# Supplementary material for: MicroRNA profiling analysis of developing berries for ‘Kyoho’ and its early-ripening mutant during berry ripening
Source: BMC Plant Biol. 2018 Nov 16;18:285. doi: 10.1186/s12870-018-1516-x (PMC6240241; doi:10.1186/s12870-018-1516-x)
Supplement: Supplementary file 4 — Table S4. The identified miRNAs in ‘Fengzao’ and ‘Kyoho’, respectively. (XLSX 115 kb) [file 12870_2018_1516_MOESM4_ESM.xlsx]

## Sheet: Table S4
	Additional file 4: Table S4: Target gene prediction results of all the miRNAs identified in this study.
geneID	miRNA	Gene name	InterPro description
VIT_00s0120g00060	vvi-miR845d	-	AAA+ ATPase domain||ATPase, AAA-type, core||P-loop containing nucleoside triphosphate hydrolase
VIT_08s0056g00910	novel_141	ZIGA4	Arf GTPase activating protein
VIT_14s0030g01740	vvi-miR3629a-5p	ZDS	Zeta-carotene desaturase||Amine oxidase
VIT_16s0039g00610	vvi-miR3630-5p	YAK1	Protein kinase-like domain||Protein kinase, ATP binding site||Serine/threonine- / dual specificity protein kinase, catalytic domain||Serine/threonine-protein kinase, active site||Protein kinase, catalytic domain
VIT_06s0009g00880	novel_141	YAB2	High mobility group (HMG) box domain||YABBY protein
VIT_07s0005g02970	vvi-miR319e,vvi-miR394b,vvi-miR159c	XIJ	IQ motif, EF-hand binding site||Myosin head, motor domain||P-loop containing nucleoside triphosphate hydrolase||Myosin, N-terminal, SH3-like
VIT_04s0008g01990	vvi-miR167c,vvi-miR167a,vvi-miR167b	XI-I	P-loop containing nucleoside triphosphate hydrolase||Myosin, N-terminal, SH3-like||Dil domain||IQ motif, EF-hand binding site||Myosin head, motor domain||Dilute
VIT_01s0011g00720	vvi-miR2111-3p	WRKY57	PWRKY transcription factor, group IIc||DNA-binding WRKY
VIT_17s0000g09380	vvi-miR159c	WNK3	Serine/threonine-protein kinase, active site||Serine/threonine- / dual specificity protein kinase, catalytic domain||Protein kinase-like domain||Protein kinase, catalytic domain
VIT_05s0020g03380	vvi-miR477a	WNK2	Protein kinase-like domain||Serine/threonine-protein kinase, active site||Serine/threonine- / dual specificity protein kinase, catalytic domain||Protein kinase, catalytic domain
VIT_13s0019g04650	vvi-miR156f	WCRKC2	Thioredoxin-like fold||Thioredoxin||Thioredoxin domain
VIT_18s0001g14680	vvi-miR3639-3p	VPS35B	Vacuolar protein sorting-associated protein 35
VIT_12s0028g02670	vvi-miR3629a-5p	VOZ2	-
VIT_15s0021g01530	vvi-miR396b,vvi-miR396a,vvi-miR2950-5p	VAD1	GRAM
VIT_08s0007g01100	vvi-miR169l,vvi-miR169b	UPP	Phosphoribosyltransferase-like||Uracil phosphoribosyl transferase
VIT_08s0007g04290	vvi-miR394b	UPL7	HECT
VIT_01s0011g01220	vvi-miR2950-5p	UFO	Galactose oxidase/kelch, beta-propeller||F-box domain, cyclin-like
VIT_05s0077g01100	vvi-miR2111-3p	UBC32	Ubiquitin-conjugating enzyme, E2||Ubiquitin-conjugating enzyme/RWD-like
VIT_14s0108g00140	vvi-miR3631a-5p	UBC3	Ubiquitin-conjugating enzyme/RWD-like||Ubiquitin-conjugating enzyme, E2
VIT_03s0038g02390	vvi-miR828a	UBC29	Ubiquitin-conjugating enzyme, active site||Ubiquitin-conjugating enzyme/RWD-like||Ubiquitin-conjugating enzyme, E2
VIT_01s0150g00590	vvi-miR319e,vvi-miR159c	U2A'	Leucine-rich repeat
VIT_13s0064g00580	vvi-miR3629a-3p	TWD1	Tetratricopeptide TPR-1||Peptidyl-prolyl cis-trans isomerase, FKBP-type||Tetratricopeptide repeat-containing domain||Peptidyl-prolyl cis-trans isomerase, FKBP-type, domain||Tetratricopeptide-like helical||Tetratricopeptide repeat
VIT_06s0061g00020	novel_141	TTN9	-
VIT_04s0069g00890	vvi-miR396b	TTN7	P-loop containing nucleoside triphosphate hydrolase||RecF/RecN/SMC||Structural maintenance of chromosomes protein||SMCs flexible hinge||Structural maintenance of chromosomes protein 3
VIT_06s0009g01060	vvi-miR3631a-3p,vvi-miR845a	TSL	Protein kinase, catalytic domain||Protein kinase-like domain||Protein kinase, ATP binding site||Serine/threonine- / dual specificity protein kinase, catalytic domain||Serine/threonine-protein kinase, active site
VIT_04s0008g06080	vvi-miR3629a-5p	TRS120	TRAPP II complex, Trs120
VIT_03s0091g01030	vvi-miR3629a-3p,vvi-miR395a	TRB1	Homeodomain-like||Histone H1/H5||Winged helix-turn-helix DNA-binding domain||Myb domain||SANT/Myb domain
VIT_06s0009g01020	vvi-miR399g	TPR7	Tetratricopeptide repeat||Tetratricopeptide-like helical||Peptidyl-prolyl cis-trans isomerase, FKBP-type||Tetratricopeptide repeat-containing domain
VIT_00s0252g00060	vvi-miR159c	TPR15	Tetratricopeptide repeat-containing domain||Tetratricopeptide TPR-1||Tetratricopeptide repeat||Tetratricopeptide-like helical||DnaJ domain||DnaJ domain, conserved site
VIT_16s0050g00490	vvi-miR159c,vvi-miR319e	TPP2	Peptidase S8, subtilisin, His-active site||Peptidase S8/S53 domain||Peptidase S8A, tripeptidyl peptidase II||Peptidase S8, subtilisin-related||Peptidase S8, subtilisin, Ser-active site
VIT_03s0088g00450	vvi-miR3629a-5p,vvi-miR845d,vvi-miR3626-3p,vvi-miR845c,novel_141,vvi-miR159c	TOR	Phosphatidylinositol 3-/4-kinase, catalytic domain||PIK-related kinase||Phosphatidylinositol 3/4-kinase, conserved site||Rapamycin-binding domain||Armadillo-like helical||PIK-related kinase, FATC||Domain of unknown function DUF3385, target of rapamycin protein||Protein kinase-like domain||PIK-related kinase, FAT||Armadillo-type fold
VIT_04s0044g01570	vvi-miR394b	TOP3A	DNA topoisomerase, type IA, core domain||Zinc finger, CCHC-type||DNA topoisomerase, type IA||DNA topoisomerase, type IA, central region, subdomain 1||DNA topoisomerase, type IA, central||Zinc finger, GRF-type||DNA topoisomerase, type IA, zn finger||DNA topoisomerase, type IA, DNA-binding||DNA topoisomerase, type IA, central region, subdomain 3
VIT_02s0012g00560	vvi-miR3629a-3p	TOM2A	Tetraspanin/Peripherin
VIT_07s0031g00220	vvi-miR172d,vvi-miR172c,vvi-miR172b,vvi-miR172a	TOE3	DNA-binding, integrase-type||AP2/ERF domain||AP2-like ethylene-responsive transcription factor
VIT_18s0001g12660	vvi-miR169d	TLP6	F-box domain, cyclin-like||Tubby, C-terminal||Tubby C-terminal-like domain||Tubby, C-terminal, conserved site
VIT_11s0118g00470	vvi-miR156a	TIP1	Ankyrin repeat-containing domain||Ankyrin repeat||Zinc finger, DHHC-type, palmitoyltransferase
VIT_03s0038g01780	vvi-miR3629a-5p	TIM	Aldolase-type TIM barrel||Triosephosphate isomerase||Triosephosphate isomerase, bacterial/eukaryotic||Triosephosphate isomerase, active site
VIT_05s0062g01080	vvi-miR156a	TIF3H1	Eukaryotic translation initiation factor 3 subunit H||JAB1/Mov34/MPN/PAD-1
VIT_17s0000g04440	vvi-miR396a,vvi-miR396b	TGH	SWAP/Surp||Domain of unknown function DUF1604
VIT_16s0098g01650	vvi-miR845a	TAP38	Protein phosphatase 2C||Protein phosphatase 2C, manganese/magnesium aspartate binding site||Protein phosphatase 2C (PP2C)-like
VIT_19s0090g01310	vvi-miR2950-5p	TAF6B4	Histone-fold||Domain of unknown function DUF1546||TATA box binding protein associated factor (TAF)||Armadillo-like helical||Armadillo-type fold
VIT_13s0019g03240	vvi-miR845d	SYP81	SNARE-complex protein Syntaxin-18 N-terminal||t-SNARE
VIT_05s0077g01930	vvi-miR845d,vvi-miR845c	SUS2	Sucrose synthase||Sucrose synthase, plant/cyanobacteria||Glycosyl transferase, family 1
VIT_10s0116g00190	vvi-miR403a	STM	Homeodomain-like||Homeobox, conserved site||Homeobox KN domain||Homeodomain||KNOX1||KNOX2||ELK
VIT_01s0010g03570	vvi-miR172a	SSP5	NLI interacting factor||HAD-like domain||Dullard phosphatase domain, eukaryotic
VIT_16s0013g00300	vvi-miR159c,vvi-miR319e	SRS2	DNA helicase, UvrD/REP type||UvrD-like Helicase, ATP-binding domain||DNA helicase, UvrD-like, C-terminal||UvrD-like helicase C-terminal domain||P-loop containing nucleoside triphosphate hydrolase
VIT_07s0129g00540	vvi-miR171a,novel_141	SRFR1	Tetratricopeptide TPR-1||Tetratricopeptide repeat-containing domain||Tetratricopeptide-like helical||Tetratricopeptide repeat
VIT_10s0003g00050	vvi-miR156f	SPL3	Transcription factor, SBP-box||Squamosa promoter-binding protein
VIT_11s0065g00170	vvi-miR156b,vvi-miR156e,vvi-miR156f,vvi-miR156a	SPL2	Transcription factor, SBP-box
VIT_11s0016g00100	vvi-miR396a,vvi-miR319e,vvi-miR159c,vvi-miR396b	SPK1	DHR-2 domain||DHR-1 domain||Dedicator of cytokinesis C-terminal||Dedicator of cytokinesis||Armadillo-type fold
VIT_14s0006g01660	vvi-miR319e,vvi-miR845c,vvi-miR159c	SOS4	Ribokinase-like||Phosphomethylpyrimidine kinase type-1||Pyridoxal phosphate (active vitamin B6) biosynthesis, pyridoxal kinase
VIT_16s0098g01870	vvi-miR3629a-3p	SOS3	EF-Hand 1, calcium-binding site||Calcium-binding EF-hand||EF-hand-like domain||Calcineurin B protein
VIT_11s0016g05420	vvi-miR159c,vvi-miR319e	SOS2	Protein kinase, ATP binding site||Protein kinase-like domain||NAF domain||Serine/threonine-protein kinase, active site||Serine/threonine- / dual specificity protein kinase, catalytic domain||Protein kinase, catalytic domain||NAF/FISL domain
VIT_01s0011g02990	vvi-miR169m	SOG1	No apical meristem (NAM) protein
VIT_06s0061g00750	vvi-miR3629a-5p	SODCP	Superoxide dismutase [Cu-Zn], chloroplastic||Superoxide dismutase, copper/zinc, binding site||Superoxide dismutase, copper/zinc binding domain
VIT_07s0031g03210	vvi-miR3629a-3p	SNRK2-9	Protein kinase, catalytic domain||Protein kinase-like domain||Protein kinase, ATP binding site||Serine/threonine- / dual specificity protein kinase, catalytic domain||Serine/threonine-protein kinase, active site
VIT_01s0011g00670	vvi-miR3629a-3p	SNAP30	Target SNARE coiled-coil domain
VIT_13s0064g01300	vvi-miR2111-5p	SMG1	Ran GTPase||Small GTP-binding protein domain||Small GTPase superfamily||Small GTPase superfamily, Rab type||Small GTPase superfamily, Ras type||P-loop containing nucleoside triphosphate hydrolase||Small GTPase superfamily, ARF type||Small GTPase superfamily, Rho type
VIT_13s0064g00180	vvi-miR159c	SMC5	RecF/RecN/SMC||Structural maintenance of chromosomes protein 5||P-loop containing nucleoside triphosphate hydrolase
VIT_02s0012g01800	vvi-miR396a,vvi-miR396b	SKL2	P-loop containing nucleoside triphosphate hydrolase||Shikimate kinase||HSP20-like chaperone||CS-like domain
VIT_06s0080g00160	vvi-miR396b,vvi-miR396a,vvi-miR2950-5p	SKD1	P-loop containing nucleoside triphosphate hydrolase||ATPase, AAA-type, core||Vps4 oligomerisation, C-terminal||ATPase, AAA-type, conserved site||MIT||AAA+ ATPase domain
VIT_17s0000g08210	vvi-miR169v	SIS3	Zinc finger, RING/FYVE/PHD-type||Zinc finger, RING-type
VIT_19s0027g01090	vvi-miR319g,vvi-miR159c,vvi-miR3633a-5p,vvi-miR319e,vvi-miR397a	SIR3	Pyridoxal phosphate-dependent transferase||Pyridoxal phosphate-dependent transferase, major region, subdomain 2||Molybdenum cofactor sulfurase||Aminotransferase, class V/Cysteine desulfurase||MOSC, N-terminal beta barrel||Pyridoxal phosphate-dependent transferase, major region, subdomain 1||Molybdenum cofactor sulfurase, C-terminal
VIT_09s0002g04380	vvi-miR156b	SGB1	Sugar/inositol transporter||General substrate transporter||Sugar transporter, conserved site||Major facilitator superfamily domain
VIT_05s0077g00550	vvi-miR3629a-3p	SFR2	Glycoside hydrolase, family 1||Glycoside hydrolase, superfamily||Glycoside hydrolase, family 1, active site||Glycoside hydrolase, catalytic domain
VIT_01s0127g00060	vvi-miR3639-3p	SEX1	ATP-grasp fold, subdomain 1||ATP-grasp fold, subdomain 2||Pyruvate phosphate dikinase, PEP/pyruvate-binding
VIT_04s0043g00760	vvi-miR159a	SEC	Tetratricopeptide repeat||Tetratricopeptide-like helical||Tetratricopeptide repeat-containing domain||O-GlcNAc transferase, C-terminal||Tetratricopeptide TPR-1||Sel1-like
VIT_11s0065g00940	vvi-miR394b	SCY1	SecY conserved site||SecY subunit domain||Protein translocase subunit SecY||SecY/SEC61-alpha family
VIT_15s0048g01290	vvi-miR3629a-5p	SAP18	Sin3 associated polypeptide p18
VIT_08s0007g02220	vvi-miR3629a-5p	RUS5	Protein of unknown function DUF647
VIT_04s0008g01330	vvi-miR394b	RTE1	Protein of unknown function DUF778
VIT_11s0016g03860	vvi-miR169r	RSY3	Lysidine-tRNA(Ile) synthetase, N-terminal||tRNA(Ile)-lysidine/2-thiocytidine synthase||Lysidine-tRNA(Ile) synthetase||Rossmann-like alpha/beta/alpha sandwich fold
VIT_06s0004g08220	vvi-miR477b-3p	RPT3	P-loop containing nucleoside triphosphate hydrolase||26S proteasome subunit P45||ATPase, AAA-type, conserved site||ATPase, AAA-type, core||AAA+ ATPase domain
VIT_18s0001g11750	vvi-miR156e	RPS9	Ribosomal protein S5 domain 2-type fold||Ribosomal protein S9, bacterial/plastid||Ribosomal protein S9, conserved site||Ribosomal protein S5 domain 2-type fold, subgroup||Ribosomal protein S9
VIT_11s0065g00450	vvi-miR3629a-5p	RPN13	26S proteasome complex ubiquitin receptor, subunit Rpn13
VIT_12s0057g01130	vvi-miR3633a-3p	RPM1	NB-ARC||P-loop containing nucleoside triphosphate hydrolase
VIT_06s0061g00770	vvi-miR3626-3p	RPL9	Ribosomal protein L9/RNase H1, N-terminal||Ribosomal protein L9, C-terminal||Ribosomal protein L9, N-terminal||Ribosomal protein L9||Ribosomal protein L9, bacteria/chloroplast
VIT_12s0035g01020	vvi-miR3629a-3p	RPL3B	Ribosomal protein L3||Translation elongation/initiation factor/Ribosomal, beta-barrel||Ribosomal protein L3, conserved site
VIT_01s0011g00420	vvi-miR390	RPK1	Protein kinase, catalytic domain||Concanavalin A-like lectin/glucanase, subgroup||Protein kinase-like domain||Leucine-rich repeat, typical subtype||Leucine-rich repeat||Leucine-rich repeat-containing N-terminal, type 2||Protein kinase, ATP binding site||Serine/threonine- / dual specificity protein kinase, catalytic domain||Serine/threonine-protein kinase, active site
VIT_12s0057g01320	vvi-miR396b	RNEE/G	Immunoglobulin-like fold||Nucleic acid-binding, OB-fold||Carbohydrate binding module family 20||Carbohydrate-binding-like fold||RNA-binding protein AU-1/Ribonuclease E/G||Ribonuclease E/G
VIT_08s0056g01420	novel_141,vvi-miR172b	RIF10	Polyribonucleotide nucleotidyltransferase||Exoribonuclease, phosphorolytic domain 2||RNA-binding domain, S1||Exoribonuclease, phosphorolytic domain 1||Nucleic acid-binding, OB-fold||Ribosomal protein S1, RNA-binding domain||Polynucleotide phosphorylase, phosphorolytic RNA-binding, bacterial/organelle-type||Ribosomal protein S5 domain 2-type fold||K Homology domain, type 1||PNPase/RNase PH domain|…
VIT_19s0085g00510	vvi-miR159c	RH36	RNA helicase, DEAD-box type, Q motif||P-loop containing nucleoside triphosphate hydrolase||DNA/RNA helicase, DEAD/DEAH box type, N-terminal||Helicase, superfamily 1/2, ATP-binding domain||Helicase, C-terminal||RNA helicase, ATP-dependent, DEAD-box, conserved site
VIT_07s0005g00420	vvi-miR319b	RFI2	Zinc finger, RING-type||Zinc finger, RING/FYVE/PHD-type
VIT_04s0044g00070	novel_141	REP	GDP dissociation inhibitor
VIT_07s0104g00390	vvi-miR167c	REF4	-
VIT_14s0060g01440	vvi-miR3629a-3p	RECQI1	Helicase, superfamily 1/2, ATP-binding domain||DNA/RNA helicase, ATP-dependent, DEAH-box type, conserved site||Helicase, C-terminal||Winged helix-turn-helix DNA-binding domain||P-loop containing nucleoside triphosphate hydrolase||DNA helicase, ATP-dependent, RecQ type||DNA/RNA helicase, DEAD/DEAH box type, N-terminal
VIT_15s0021g02140	vvi-miR159c,vvi-miR319e	RDO4	Zinc finger, RING/FYVE/PHD-type||Zinc finger, RING-type, conserved site||Zinc finger, RING-type
VIT_06s0004g07670	vvi-miR3631b-3p	RDM4	Transcription factor Iwr1
VIT_05s0020g03840	vvi-miR3629a-5p	RDM1	Protein RDM1
VIT_14s0066g00880	vvi-miR3631b-3p	RCK	Helicase, superfamily 1/2, ATP-binding domain||Sec63 domain||Helicase, C-terminal||P-loop containing nucleoside triphosphate hydrolase||DNA/RNA helicase, DEAD/DEAH box type, N-terminal
VIT_08s0032g00530	vvi-miR3629a-5p	RBL15	Peptidase S54, rhomboid domain||Ubiquitin-associated/translation elongation factor EF1B, N-terminal, eukaryote||UBA-like||Ubiquitin-associated/translation elongation factor EF1B, N-terminal
VIT_01s0011g01360	vvi-miR828a	RAN1	HAD-like domain||P-type ATPase, A domain||P-type ATPase, phosphorylation site||Cation-transporting P-type ATPase, subfamily IB||Cation-transporting P-type ATPase||Heavy metal-associated domain, HMA||Heavy metal-associated domain, copper ion-binding||P-type ATPase, cytoplasmic domain N||Heavy-metal-associated, conserved site
VIT_05s0051g00860	vvi-miR396b,vvi-miR396a	PTAC5	Heat shock protein DnaJ, cysteine-rich domain||Peptidoglycan binding-like
VIT_04s0043g00700	vvi-miR156a	PTAC3	Pentatricopeptide repeat||SAP domain
VIT_07s0005g01430	novel_141	PRL	Nucleic acid-binding, OB-fold||P-loop containing nucleoside triphosphate hydrolase||DNA replication licensing factor Mcm7||MCM N-terminal domain||Mini-chromosome maintenance, DNA-dependent ATPase||AAA+ ATPase domain||Mini-chromosome maintenance, conserved site
VIT_01s0011g01180	vvi-miR156b	POLH	DNA polymerase, Y-family, little finger domain||DNA-repair protein, UmuC-like||DNA polymerase eta||DNA-repair protein, UmuC-like, N-terminal
VIT_16s0039g00730	vvi-miR3629a-5p	POLD4	DNA polymerase delta, subunit 4
VIT_14s0066g01880	vvi-miR3629a-5p	PMZ	Zinc finger, AN1-type
VIT_03s0088g01190	vvi-miR3629a-3p	PMDH2	L-lactate/malate dehydrogenase||Malate dehydrogenase, active site||NAD(P)-binding domain||Malate dehydrogenase, type 1||Lactate/malate dehydrogenase, C-terminal||Lactate dehydrogenase/glycoside hydrolase, family 4, C-terminal||Lactate/malate dehydrogenase, N-terminal
VIT_05s0077g01830	vvi-miR3633a-5p	PLDP1	Phospholipase D/Transphosphatidylase||Pleckstrin homology domain||Pleckstrin homology-like domain||Phospholipase D family||Phospholipase D-like domain
VIT_04s0043g00740	vvi-miR3629a-5p,vvi-miR3631a-3p,vvi-miR396b,vvi-miR3631b-3p	PIR	Cytoplasmic FMR1-interacting
VIT_08s0007g04700	vvi-miR2950-5p,vvi-miR394b	PIP5K9	Phosphatidylinositol-4-phosphate 5-kinase, core||Phosphatidylinositol-4-phosphate 5-kinase, core, subgroup||Phosphatidylinositol-4-phosphate 5-kinase, N-terminal domain||Phosphatidylinositol-4-phosphate 5-kinase, C-terminal||MORN motif||Phosphatidylinositol-4-phosphate 5-kinase, plant||Phosphatidylinositol-4-phosphate 5-kinase
VIT_14s0060g00260	vvi-miR3633a-5p	PIF3	Basic helix-loop-helix (bHLH) transcription factors ALC-like, plant||Myc-type, basic helix-loop-helix (bHLH) domain
VIT_11s0118g00410	vvi-miR396b,vvi-miR845c,vvi-miR396a,vvi-miR845d,vvi-miR2950-5p,vvi-miR845a	PHT4;5	Major facilitator superfamily||Major facilitator superfamily domain
VIT_14s0036g00430	vvi-miR159c	PGSIP6	Glycosyl transferase, family 8||Nucleotide-diphospho-sugar transferases
VIT_16s0022g02320	vvi-miR482	PGM	Alpha-D-phosphohexomutase, alpha/beta/alpha I/II/III||Alpha-D-phosphohexomutase, C-terminal||Alpha-D-phosphohexomutase, conserved site||Alpha-D-phosphohexomutase, alpha/beta/alpha domain I||Alpha-D-phosphohexomutase superfamily||Alpha-D-phosphohexomutase, alpha/beta/alpha domain II||Alpha-D-phosphohexomutase, alpha/beta/alpha domain III
VIT_16s0013g01140	vvi-miR2111-3p	PFK4	Phosphofructokinase||Pyrophosphate-dependent phosphofructokinase TP0108||Phosphofructokinase domain
VIT_18s0001g05660	vvi-miR3639-5p	PFI	Ubiquitin-related domain||Leucine-rich repeat, typical subtype||Leucine-rich repeat||CAP Gly-rich domain
VIT_07s0104g01610	vvi-miR3629a-3p	PEX6	AAA+ ATPase domain||P-loop containing nucleoside triphosphate hydrolase||ATPase, AAA-type, core||ATPase, AAA-type, conserved site
VIT_19s0015g01940	vvi-miR159c	PEX5	Tetratricopeptide repeat-containing domain||Tetratricopeptide TPR2||Tetratricopeptide-like helical||Peroxisomal targeting signal 1 receptor family||Tetratricopeptide repeat
VIT_17s0000g08410	novel_141	PEX14	Peroxisome membrane anchor protein Pex14p, N-terminal||Peroxisomal membrane protein 14
VIT_18s0001g11260	vvi-miR162	PDE135	Nucleobase-ascorbate transporter 3||Xanthine/uracil/vitamin C permease
VIT_19s0015g01270	vvi-miR319e,vvi-miR159c	PA200	Armadillo-like helical||Protein of unknown function DUF3437||Armadillo-type fold
VIT_05s0020g01550	vvi-miR394b	OVA2	Aminoacyl-tRNA synthetase, class Ia||Rossmann-like alpha/beta/alpha sandwich fold||Isoleucine-tRNA ligase||Aminoacyl-tRNA synthetase, class I, conserved site||Aminoacyl-tRNA synthetase, class 1a, anticodon-binding||Zinc finger, DNA glycosylase/AP lyase/isoleucyl tRNA synthetase||Valyl/Leucyl/Isoleucyl-tRNA synthetase, class I, anticodon-binding||Valyl/Leucyl/Isoleucyl-tRNA synthetase, class Ia, e…
VIT_13s0019g00810	vvi-miR3629a-3p	OVA1	Rossmann-like alpha/beta/alpha sandwich fold||Methionyl-tRNA synthetase||Aminoacyl-tRNA synthetase, class 1a, anticodon-binding||Methionine-tRNA synthetase, type 2||Methionyl/Leucyl tRNA synthetase||Valyl/Leucyl/Isoleucyl-tRNA synthetase, class I, anticodon-binding
VIT_18s0001g04180	vvi-miR160c,vvi-miR160a	ORF164	Auxin response factor
VIT_01s0011g05730	vvi-miR2950-5p	NUP155	Nucleoporin, Nup155-like||Nucleoporin, Nup133/Nup155-like, C-terminal||Nucleoporin, Nup133/Nup155-like, N-terminal
VIT_19s0085g01090	vvi-miR156b	NUA	Tetratricopeptide, MLP1/MLP2-like
VIT_01s0010g03790	vvi-miR3639-5p	NTF2A	Nuclear transport factor 2||Nuclear transport factor 2, Eukaryote
VIT_00s0229g00020	vvi-miR395a	NS1	Aminoacyl-tRNA synthetase, class II (D/K/N)||Nucleic acid binding, OB-fold, tRNA/helicase-type||Aminoacyl-tRNA synthetase, class II||Aspartyl/Asparaginyl-tRNA synthetase, class IIb||Aminoacyl-tRNA synthetase, class II (D/K/N)-like||Asparagine-tRNA ligase, class IIb||Nucleic acid-binding, OB-fold
VIT_13s0067g03120	vvi-miR159c	NRPD1B	RNA polymerase Rpb1, domain 5||RNA polymerase Rpb1, domain 1||RNA polymerase, alpha subunit||RNA polymerase Rpb1, domain 3||RNA polymerase, N-terminal
VIT_02s0025g04530	vvi-miR156a	NRPD1A	Protein of unknown function DUF3223||RNA polymerase Rpb1, domain 5||RNA polymerase Rpb1, domain 4||RNA polymerase Rpb1, domain 3||RNA polymerase Rpb1, domain 1||Copper amine oxidase, N2/N3-terminal||RNA polymerase, alpha subunit||RNA polymerase, N-terminal
VIT_12s0028g03770	vvi-miR3629a-5p	NRPB2	RNA polymerase, beta subunit, conserved site||DNA-directed RNA polymerase, subunit 2||RNA polymerase, beta subunit, protrusion||RNA polymerase Rpb2, domain 7||RNA polymerase Rpb2, domain 3||RNA polymerase Rpb2, domain 4||RNA polymerase Rpb2, domain 2||RNA polymerase Rpb2, domain 5||RNA polymerase Rpb2, OB-fold||DNA-directed RNA polymerase, subunit 2, domain 6
VIT_13s0084g00600	novel_141	NRPA2	DNA-directed RNA polymerase, subunit 2, domain 6||RNA polymerase Rpb2, domain 2||RNA polymerase Rpb2, OB-fold||RNA polymerase, beta subunit, conserved site||RNA polymerase Rpb2, domain 7||RNA polymerase I, Rpa2 specific||RNA polymerase Rpb2, domain 3||DNA-directed RNA polymerase, subunit 2||RNA polymerase, beta subunit, protrusion
VIT_17s0000g08000	vvi-miR3629a-5p	NFD2	Ribonuclease III domain
VIT_04s0008g00860	vvi-miR3629a-5p	NDL2	Ndr||Alpha/Beta hydrolase fold
VIT_19s0014g00330	vvi-miR3629a-3p	NADK3	Inorganic polyphosphate/ATP-NAD kinase, predicted||ATP-NAD kinase, PpnK-type, all-beta||ATP-NAD kinase-like domain||Inorganic polyphosphate/ATP-NAD kinase, domain 1
VIT_15s0021g00570	vvi-miR3629a-5p	MTACP-1	Acyl carrier protein-like||Acyl carrier protein (ACP)
VIT_17s0000g04170	vvi-miR3639-5p	MSH2	P-loop containing nucleoside triphosphate hydrolase||DNA mismatch repair protein, MSH2||DNA mismatch repair protein MutS, core||DNA mismatch repair protein MutS-like, N-terminal||DNA mismatch repair protein MutS, C-terminal||DNA mismatch repair protein MutS, connector domain||DNA mismatch repair protein MutS, clamp
VIT_05s0049g02090	vvi-miR477a	MSH1	DNA mismatch repair protein MutS, N-terminal||DNA mismatch repair protein MutS-like, N-terminal||GIY-YIG nuclease superfamily||P-loop containing nucleoside triphosphate hydrolase||DNA mismatch repair protein MutS, C-terminal
VIT_17s0000g04870	vvi-miR3629a-3p	MPB2C	-
VIT_13s0067g00670	vvi-miR156a	MOS7	WD40-repeat-containing domain||Nucleoporin Nup88
VIT_06s0004g02600	vvi-miR159c,vvi-miR319e	MOM	SNF2-related||Chromo domain-like||Chromo domain/shadow||Zinc finger, PHD-type||P-loop containing nucleoside triphosphate hydrolase||Zinc finger, FYVE/PHD-type||Zinc finger, PHD-type, conserved site||Helicase, C-terminal||Zinc finger, RING/FYVE/PHD-type||Zinc finger, PHD-finger||Chromo domain
VIT_12s0035g02190	vvi-miR3631b-3p	MLO13	Mlo-related protein
VIT_10s0003g01430	vvi-miR167a	MEE62	Protein kinase-like domain||Protein kinase, catalytic domain||Concanavalin A-like lectin/glucanase, subgroup||Leucine-rich repeat, typical subtype||Leucine-rich repeat||Serine-threonine/tyrosine-protein kinase catalytic domain
VIT_02s0033g00190	vvi-miR395a	MCM9	P-loop containing nucleoside triphosphate hydrolase||AAA+ ATPase domain||Mini-chromosome maintenance, DNA-dependent ATPase
VIT_03s0063g00290	vvi-miR156b	MCCB	Acetyl-coenzyme A carboxyltransferase, C-terminal||Acetyl-coenzyme A carboxyltransferase, N-terminal||ClpP/crotonase-like domain||Carboxyl transferase
VIT_13s0084g00080	vvi-miR477b-3p,vvi-miR3629a-5p	MAP65-5	Microtubule-associated protein, MAP65/Ase1/PRC1
VIT_19s0014g00350	vvi-miR3629a-3p	LZF1	Zinc finger, B-box
VIT_14s0030g01350	vvi-miR3624-5p,vvi-miR394b	LRS1	WD40 repeat, conserved site||WD40/YVTN repeat-like-containing domain||G-protein beta WD-40 repeat||WD40-repeat-containing domain||WD40 repeat||Protein of unknown function DUF3337
VIT_09s0018g00400	vvi-miR172a	LPA3	Domain of unknown function DUF1995
VIT_13s0019g04140	vvi-miR3629a-5p	LHCA1	Chlorophyll A-B binding protein||Chlorophyll a/b binding protein domain||Chlorophyll A-B binding protein, plant
VIT_13s0067g02380	vvi-miR477b-5p	LBD15	Lateral organ boundaries, LOB
VIT_03s0038g02140	vvi-miR156a	LAX2	Amino acid transporter, transmembrane
VIT_14s0128g00720	vvi-miR166a	LACS7	AMP-dependent synthetase/ligase||AMP-binding, conserved site
VIT_08s0007g00600	vvi-miR397a	LAC2	Laccase||Multicopper oxidase, copper-binding site||Multicopper oxidase, type 3||Multicopper oxidase, type 1||Cupredoxin||Multicopper oxidase, type 2
VIT_15s0021g01180	vvi-miR156a	KIS	Tubulin binding cofactor A
VIT_07s0031g00130	vvi-miR156b	KICP-02	Kinesin, motor domain||Kinesin-like protein||P-loop containing nucleoside triphosphate hydrolase||Kinesin, motor region, conserved site
VIT_00s0282g00020	vvi-miR845d	KEA3	Cation/H+ exchanger
VIT_16s0098g01400	vvi-miR3629a-5p	ISI1	Armadillo-like helical||Armadillo-type fold||Cell division protein Cdc14
VIT_18s0001g13870	vvi-miR3629a-5p	iqd32	IQ motif, EF-hand binding site||Domain of unknown function DUF4005||P-loop containing nucleoside triphosphate hydrolase
VIT_02s0025g04120	vvi-miR159a	IQD22	Domain of unknown function DUF4005||P-loop containing nucleoside triphosphate hydrolase||IQ motif, EF-hand binding site
VIT_16s0098g01790	vvi-miR3631a-3p	iqd21	IQ motif, EF-hand binding site||Domain of unknown function DUF4005
VIT_19s0014g01630	novel_141	IPT9	tRNA delta(2)-isopentenylpyrophosphate transferase||P-loop containing nucleoside triphosphate hydrolase
VIT_05s0051g00350	vvi-miR3631a-5p	ING1	Inhibitor of growth protein, N-terminal||ING family||Zinc finger, PHD-finger||Zinc finger, PHD-type, conserved site||Zinc finger, FYVE/PHD-type||Zinc finger, RING/FYVE/PHD-type||Zinc finger, PHD-type
VIT_01s0011g02530	vvi-miR156b	ICME-LIKE1	Alpha/Beta hydrolase fold||Alpha/beta hydrolase fold-3
VIT_00s0516g00030	vvi-miR3629a-3p,vvi-miR172a,vvi-miR3629a-5p	IBR1	Glucose/ribitol dehydrogenase||Short-chain dehydrogenase/reductase, conserved site||NAD(P)-binding domain
VIT_14s0108g01210	vvi-miR845c,vvi-miR845d	HYP1	Domain of unknown function DUF221||Domain of unknown function DUF4463
VIT_04s0008g05210	vvi-miR3629a-5p	HY5	Basic-leucine zipper domain
VIT_04s0008g04700	vvi-miR3629a-5p	HTA9	Histone core||Histone-fold||Histone H2A
VIT_14s0030g01250	vvi-miR156a	HST	Armadillo-like helical||Armadillo-type fold||Exportin-1/Importin-beta-like
VIT_04s0008g05870	vvi-miR3639-3p	HSP98.7	AAA+ ATPase domain||Double Clp-N motif||Chaperonin ClpB||Clp, N-terminal||ClpA/B, conserved site 2||Chaperonin ClpA/B||ATPase, AAA-type, core||Clp ATPase, C-terminal||Chaperonin ClpA/B, conserved site||P-loop containing nucleoside triphosphate hydrolase
VIT_09s0002g02240	vvi-miR3629a-3p	HSP60-3A	GroEL-like apical domain||GroEL-like equatorial domain||Chaperonin Cpn60, conserved site||Chaperonin Cpn60||Chaperonin Cpn60/TCP-1
VIT_10s0071g00870	vvi-miR3629a-5p	HMGB6	High mobility group (HMG) box domain
VIT_17s0000g02210	vvi-miR159c,vvi-miR845d	HIP	Tetratricopeptide-like helical||Thioredoxin-like fold||Thioredoxin||Thioredoxin domain||Tetratricopeptide repeat||Thioredoxin, conserved site||Tetratricopeptide repeat-containing domain
VIT_10s0003g04990	vvi-miR2111-3p	HERK2	Protein kinase-like domain||Concanavalin A-like lectin/glucanase, subgroup||Protein kinase, catalytic domain||Malectin-like carbohydrate-binding domain||Serine-threonine/tyrosine-protein kinase catalytic domain||Protein kinase, ATP binding site||Serine/threonine-protein kinase, active site||Serine/threonine- / dual specificity protein kinase, catalytic domain
VIT_04s0044g01510	vvi-miR3629a-3p	hda14	Histone deacetylase superfamily||Histone deacetylase domain
VIT_05s0077g01010	vvi-miR156a	HCF107	RNA-processing protein, HAT helix||Tetratricopeptide repeat-containing domain||Tetratricopeptide TPR2||Tetratricopeptide-like helical||Tetratricopeptide repeat
VIT_03s0091g00290	vvi-miR156b	HAT3.1	Homeodomain||Zinc finger, PHD-finger||Homeodomain-like||Zinc finger, PHD-type, conserved site||Zinc finger, FYVE/PHD-type||Zinc finger, RING/FYVE/PHD-type||Zinc finger, PHD-type
VIT_07s0005g03640	novel_141,vvi-miR3629a-5p	HAP6	Ribophorin II
VIT_01s0011g03020	vvi-miR156a	HAK5	K+ potassium transporter
VIT_13s0047g00510	novel_141	GYRA	DNA topoisomerase, type IIA, subunit A/ C-terminal, alpha-beta||DNA gyrase, subunit A||DNA gyrase/topoisomerase IV, subunit A, C-terminal beta-pinwheel||DNA topoisomerase, type IIA, subunit A/C-terminal||Arginine repressor C-terminal-like domain||DNA topoisomerase, type IIA-like domain
VIT_14s0171g00380	vvi-miR156f	GTE8	Bromodomain||NET domain
VIT_12s0028g02510	vvi-miR3631a-3p	GTE4	NET domain||Bromodomain
VIT_13s0067g03470	novel_141	GSTL2	Glutathione S-transferase, C-terminal-like||Glutathione S-transferase, N-terminal||Thioredoxin-like fold
VIT_01s0011g01630	vvi-miR396b,vvi-miR396a	GRL	Nck-associated protein 1
VIT_03s0038g03230	vvi-miR3629a-5p,vvi-miR3629a-3p	GPAT9	Phospholipid/glycerol acyltransferase
VIT_14s0066g02390	vvi-miR3629a-5p	GMII	Glycoside hydrolase/deacetylase, beta/alpha-barrel||Glycoside hydrolase family 38, N-terminal domain||Glycosyl hydrolase, family 13, all-beta||Glycoside hydrolase 38/57, N-terminal domain||Glycoside hydrolase, families 57/38, central domain||Glycosyl hydrolase family 38, C-terminal||Galactose mutarotase-like domain||Glycoside hydrolase, family 38, central domain
VIT_04s0008g04210	vvi-miR3629a-5p	GLB3	Globin, truncated bacterial-like||Globin, structural domain||Globin-like
VIT_18s0157g00020	vvi-miR3629a-5p	GI	GIGANTEA
VIT_13s0064g01360	vvi-miR3629a-5p	GFA2	Heat shock protein DnaJ, cysteine-rich domain||DnaJ domain||DnaJ domain, conserved site||Chaperone DnaJ||HSP40/DnaJ peptide-binding||Chaperone DnaJ, C-terminal
VIT_16s0098g00540	vvi-miR845a,vvi-miR845d,vvi-miR845c	GC5	TATA element modulatory factor 1 TATA binding||TATA element modulatory factor 1 DNA binding
VIT_14s0060g00640	vvi-miR828a	G6PD4	Glucose-6-phosphate dehydrogenase, C-terminal||NAD(P)-binding domain||Glucose-6-phosphate dehydrogenase||Glucose-6-phosphate dehydrogenase, NAD-binding
VIT_13s0019g00220	vvi-miR156e,vvi-miR156b	FY	WD40 repeat, conserved site||WD40/YVTN repeat-like-containing domain||WD40-repeat-containing domain||G-protein beta WD-40 repeat||WD40 repeat
VIT_16s0039g02400	vvi-miR396b,vvi-miR396a	FU	Protein kinase, catalytic domain||Armadillo-type fold||Protein kinase-like domain||Armadillo||Armadillo-like helical||Protein kinase, ATP binding site||Serine/threonine-protein kinase, active site||Serine/threonine- / dual specificity protein kinase, catalytic domain
VIT_09s0054g01830	vvi-miR477a	FRS4	FAR1 DNA binding domain||Zinc finger, SWIM-type||Zinc finger, PMZ-type||FHY3/FAR1 family||MULE transposase domain
VIT_03s0017g01830	novel_141	FRS2	Zinc finger, PMZ-type||Zinc finger, SWIM-type||FAR1 DNA binding domain||MULE transposase domain||FHY3/FAR1 family
VIT_01s0011g00240	vvi-miR3629a-5p	FLN2	Ribokinase-like||Carbohydrate kinase PfkB
VIT_08s0007g03930	vvi-miR169o	FK	Ergosterol biosynthesis ERG4/ERG24||Sterol reductase, conserved site
VIT_08s0056g01620	vvi-miR396b,vvi-miR396a,vvi-miR3639-3p	FIP2	BTB/POZ fold||Pentapeptide repeat||BTB/POZ-like||Potassium channel tetramerisation-type BTB domain
VIT_04s0008g00800	vvi-miR3629a-5p	FC1	Ferrochelatase||Ferrochelatase, active site
VIT_08s0105g00570	vvi-miR156a	FAC1	Adenosine/AMP deaminase domain||AMP deaminase||Adenosine/AMP deaminase active site
VIT_01s0011g04790	vvi-miR399i	FAB1C	GroEL-like apical domain||Phosphatidylinositol-4-phosphate 5-kinase, N-terminal domain||Phosphatidylinositol-4-phosphate 5-kinase, core||Chaperonin Cpn60/TCP-1||Zinc finger, RING/FYVE/PHD-type||Phosphatidylinositol-4-phosphate 5-kinase, C-terminal||Zinc finger, FYVE-related||Phosphatidylinositol-4-phosphate 5-kinase, core, subgroup||Zinc finger, FYVE/PHD-type
VIT_05s0102g01110	vvi-miR3633a-5p	ETFQO	Electron transfer flavoprotein-ubiquinone oxidoreductase
VIT_04s0008g01970	vvi-miR3629a-5p	ER	Leucine-rich repeat, typical subtype||Leucine-rich repeat||Leucine-rich repeat-containing N-terminal, type 2||Protein kinase, ATP binding site||Serine/threonine- / dual specificity protein kinase, catalytic domain||Serine/threonine-protein kinase, active site||Protein kinase, catalytic domain||Protein kinase-like domain
VIT_06s0009g03810	vvi-miR3630-5p	ENS	Armadillo-type fold||MIF4-like, type 1/2/3||MIF4G-like, type 1||MIF4G-like, type 2||MIF4G-like, type 3||Nuclear cap-binding protein subunit 1
VIT_03s0038g03440	vvi-miR3629a-5p	EMB86	Threonyl/alanyl tRNA synthetase, class II-like, putative editing domain||Translation elongation/initiation factor/Ribosomal, beta-barrel||Alanine-tRNA ligase, eukaryota/bacteria||Threonyl/alanyl tRNA synthetase, SAD||Alanine-tRNA ligase, class IIc, anti-codon-binding domain||Probable alanine--tRNA ligase, plants||Alanyl-tRNA synthetase, class IIc, core domain||Phosphoesterase, DHHA1||Alanyl-tRNA …
VIT_05s0020g02030	vvi-miR845c,vvi-miR845a,vvi-miR845d	EMB3004	NAD(P)-binding domain||Aldolase-type TIM barrel||Quinate/shikimate 5-dehydrogenase/glutamyl-tRNA reductase||Dehydroquinase class I||Shikimate dehydrogenase||Shikimate, quinate/shikimate dehydrogenase||Shikimate dehydrogenase substrate binding, N-terminal
VIT_13s0067g01210	vvi-miR396a,vvi-miR396b,vvi-miR156a	EMB2771	Anaphase-promoting complex subunit 1||Proteasome/cyclosome, regulatory subunit
VIT_09s0002g05110	vvi-miR159c,vvi-miR319e	EMB2753	Tetratricopeptide repeat||Tetratricopeptide-like helical||Tetratricopeptide repeat-containing domain||GAG-pre-integrase domain||Ribonuclease H-like domain||N-terminal acetyltransferase A, auxiliary subunit||Integrase, catalytic core
VIT_19s0090g00920	vvi-miR164a,vvi-miR319e,vvi-miR3629a-3p,vvi-miR159c,vvi-miR2950-5p,vvi-miR535a	EMB2729	Glycosyl hydrolase, family 13, all-beta||Immunoglobulin E-set||Glycosyl hydrolase, family 13, subfamily, catalytic domain||Glycoside hydrolase, catalytic domain||Immunoglobulin-like fold||Glycoside hydrolase, superfamily||1,4-alpha-glucan-branching enzyme||Alpha-amylase, C-terminal all beta||Glycoside hydrolase, family 13, N-terminal||Glycosyl hydrolase, family 13, catalytic domain||Glycoside hyd…
VIT_01s0010g02570	vvi-miR394b	EMB260	Monooxygenase, FAD-binding
VIT_04s0008g04320	vvi-miR394b	emb2410	Reverse transcriptase zinc-binding domain||Protein of unknown function DUF490
VIT_07s0104g00040	vvi-miR394b	EMB2289	SecY/SEC61-alpha family||SecY subunit domain
VIT_03s0063g02590	novel_141	EMB2219	Mitochodrial transcription termination factor-related
VIT_08s0032g00090	vvi-miR3631b-3p	EMB161	P-loop containing nucleoside triphosphate hydrolase||Replication factor C, C-terminal domain||DNA polymerase III, clamp loader complex, gamma/delta/delta subunit, C-terminal||AAA+ ATPase domain
VIT_19s0014g00400	vvi-miR3629a-5p	emb1473	Ribosomal protein L13, conserved site||Ribosomal protein L13 domain||Ribosomal protein L13||Ribosomal protein L13, bacterial-type
VIT_11s0016g05060	vvi-miR156a	emb1187	Protein kinase-like domain
VIT_19s0085g01020	vvi-miR845a	EMB1135	Protein strawberry notch||Zinc finger, RING/FYVE/PHD-type||Strawberry notch, helicase C domain||Zinc finger, PHD-finger||Zinc finger, PHD-type||P-loop containing nucleoside triphosphate hydrolase||Zinc finger, PHD-type, conserved site||Zinc finger, FYVE/PHD-type
VIT_01s0011g01130	vvi-miR159c	EMB1025	Pentatricopeptide repeat||Tetratricopeptide-like helical
VIT_13s0067g03400	vvi-miR477a	ELP6	Histone acetylation protein 2||Uncharacterised protein family UPF0405||P-loop containing nucleoside triphosphate hydrolase
VIT_17s0000g10190	vvi-miR3631a-3p	ELO3	Histone acetyltransferase ELP3||Radical SAM||GNAT domain||Acyl-CoA N-acyltransferase||Elongator protein 3/MiaB/NifB||Radical SAM, alpha/beta horseshoe
VIT_13s0019g00590	vvi-miR3631b-3p,vvi-miR3631a-5p	ELO2	WD40-repeat-containing domain||IKI3||WD40/YVTN repeat-like-containing domain
VIT_13s0019g01720	vvi-miR156e,vvi-miR156b	ELD1	-
VIT_14s0030g01440	vvi-miR172c	EDR1	Serine-threonine/tyrosine-protein kinase catalytic domain||Protein kinase, catalytic domain||Serine/threonine-protein kinase, active site||Serine/threonine- / dual specificity protein kinase, catalytic domain||Protein kinase, ATP binding site||Protein kinase-like domain
VIT_19s0090g01430	vvi-miR169x,vvi-miR169f	EDM2	DNA (cytosine-5)-methyltransferase 1, replication foci domain||Zinc finger, PHD-type||Zinc finger, RING/FYVE/PHD-type
VIT_15s0021g01430	vvi-miR319e,vvi-miR159c,vvi-miR3623-5p	EDD1	Glycine-tRNA ligase, beta subunit||Glycine-tRNA synthetase, heterodimeric||Glycine-tRNA ligase, alpha subunit
VIT_08s0007g05330	vvi-miR156b	EDA7	WD40 repeat||NUC153||WD40-repeat-containing domain||WD40/YVTN repeat-like-containing domain
VIT_09s0018g02090	novel_141	EDA30	GDP-fucose protein O-fucosyltransferase
VIT_18s0001g08850	vvi-miR3631a-3p	ECA3	HAD-like domain||P-type ATPase, transmembrane domain||P-type ATPase, phosphorylation site||P-type ATPase, A domain||Cation-transporting P-type ATPase||Calcium-transporting P-type ATPase, subfamily IIA, SERCA-type||Cation-transporting P-type ATPase, C-terminal||P-type ATPase, cytoplasmic domain N
VIT_12s0034g02230	vvi-miR399i,vvi-miR396a,vvi-miR396b	EBS1	Nucleotide-diphospho-sugar transferases||UDP-glucose:Glycoprotein Glucosyltransferase||Glycosyl transferase, family 8
VIT_15s0021g02040	vvi-miR159a	DUO1	Myb domain||SANT/Myb domain||Homeodomain-like
VIT_19s0014g02500	vvi-miR3629a-3p	DRP5A	P-loop containing nucleoside triphosphate hydrolase||Dynamin, GTPase domain||Dynamin||Dynamin-type guanine nucleotide-binding (G) domain
VIT_11s0078g00440	vvi-miR408	DOT2	SART-1 protein
VIT_08s0007g03920	vvi-miR3633a-5p	DML1	Endonuclease III-like, iron-sulphur cluster loop motif||HhH-GPD domain||Helix-turn-helix, base-excision DNA repair, C-terminal||Permuted single zf-CXXC unit||DNA glycosylase||Demeter, RRM-fold domain
VIT_06s0009g02170	novel_141	DGS1	Nuclear control of ATP synthase 2
VIT_17s0000g07630	vvi-miR3629a-5p	DEL1	Winged helix-turn-helix DNA-binding domain||E2F Family||Transcription factor E2F/dimerisation partner (TDP)
VIT_14s0006g01570	vvi-miR396a,vvi-miR396b,vvi-miR171a	DegP7	PDZ-like domain||Trypsin-like cysteine/serine peptidase domain||PDZ domain||Peptidase S1C
VIT_10s0003g00070	vvi-miR169b,vvi-miR169r,vvi-miR169m	DEG15	Peptidase S1C||Trypsin-like cysteine/serine peptidase domain
VIT_06s0004g06550	vvi-miR156a	DDB2	WD40/YVTN repeat-like-containing domain||WD40 repeat, conserved site||WD40 repeat||WD40-repeat-containing domain
VIT_03s0017g01930	vvi-miR845d	CYP97B3	Cytochrome P450, conserved site||Cytochrome P450||Cytochrome P450, E-class, group I
VIT_13s0064g00370	vvi-miR159c	CYL1	Alpha-N-acetylglucosaminidase, N-terminal||Alpha-N-acetylglucosaminidase, tim-barrel domain||Alpha-N-acetylglucosaminidase||Alpha-N-acetylglucosaminidase, C-terminal
VIT_05s0077g01250	vvi-miR3629a-5p	CTL2	Lysozyme-like domain||Glycoside hydrolase, family 19||Glycoside hydrolase, family 19, catalytic
VIT_11s0065g00710	vvi-miR3633b-3p	CSTF77	Tetratricopeptide repeat||Suppressor of forked||Tetratricopeptide-like helical||Reverse transcriptase zinc-binding domain||RNA-processing protein, HAT helix
VIT_08s0056g00820	vvi-miR3631b-3p	CS26	Cysteine synthase A||Cysteine synthase/cystathionine beta-synthase P-phosphate-binding site||Cysteine synthase K/M||Tryptophan synthase beta subunit-like PLP-dependent enzymes superfamily
VIT_04s0008g02670	vvi-miR3633a-5p	CRY3	Cryptochrome/DNA photolyase, class 1||DNA photolyase, FAD-binding/Cryptochrome, C-terminal||Rossmann-like alpha/beta/alpha sandwich fold||Cryptochrome, DASH||DNA photolyase, N-terminal
VIT_18s0001g05680	vvi-miR3630-5p	CRY1	Cryptochrome/DNA photolyase, class 1||Cryptochrome/DNA photolyase, class 1 conserved site, C-terminal||DNA photolyase, FAD-binding/Cryptochrome, C-terminal||Cryptochrome C-terminal||Rossmann-like alpha/beta/alpha sandwich fold||Cryptochrome, plant||DNA photolyase, N-terminal
VIT_16s0022g01860	vvi-miR396a,vvi-miR396b,vvi-miR2950-5p	CPSF160	Cleavage/polyadenylation specificity factor, A subunit, C-terminal
VIT_12s0059g01420	vvi-miR169o,vvi-miR169m	COP1	WD40 repeat||Zinc finger, RING/FYVE/PHD-type||WD40-repeat-containing domain||Zinc finger, RING-type, conserved site||WD40/YVTN repeat-like-containing domain||WD40 repeat, conserved site||Zinc finger, RING-type
VIT_14s0083g01150	vvi-miR156a	COBL4	Glycosyl-phosphatidyl inositol-anchored, plant
VIT_06s0004g01080	vvi-miR390	CMT3	Chromo domain, conserved site||Chromo domain||Bromo adjacent homology (BAH) domain||S-adenosyl-L-methionine-dependent methyltransferase-like||C-5 cytosine methyltransferase||DNA methylase, C-5 cytosine-specific, active site||Chromo domain-like||Chromo domain/shadow
VIT_01s0010g00480	vvi-miR845c,vvi-miR845a,vvi-miR845d	CM3	Chorismate mutase, AroQ class, eukaryotic type||Chorismate mutase, type II
VIT_10s0116g00860	vvi-miR156e,novel_141	CLS	CDP-alcohol phosphatidyltransferase
VIT_03s0038g04260	vvi-miR3631a-3p,vvi-miR3631b-3p	CLC-E	Chloride channel, core||Cystathionine beta-synthase, core||Chloride channel, voltage gated
VIT_04s0044g01680	vvi-miR396b,vvi-miR3631b-3p	CHR24	P-loop containing nucleoside triphosphate hydrolase||SNF2-related||Helicase, superfamily 1/2, ATP-binding domain||Helicase, C-terminal
VIT_03s0063g02410	vvi-miR3635-5p	CHB3	Homeodomain-like||SWIRM domain||Winged helix-turn-helix DNA-binding domain||SANT domain||SANT/Myb domain||Zinc finger, ZZ-type
VIT_07s0005g01790	vvi-miR3629a-5p	CER8	AMP-binding, conserved site||AMP-dependent synthetase/ligase
VIT_09s0002g05090	vvi-miR156f	CENP-C	-
VIT_10s0003g04530	vvi-miR2950-5p,vvi-miR159c,vvi-miR396b,vvi-miR319e,vvi-miR396a	CCC1	Na/K/Cl co-transporter superfamily||Amino acid permease domain
VIT_01s0026g01040	novel_141	CCB4	Protein of unknown function DUF2930
VIT_08s0056g01700	vvi-miR396a,vvi-miR396b	CAT4	Cationic amino acid transporter, C-terminal||Amino acid/polyamine transporter I
VIT_11s0065g00640	vvi-miR167b,vvi-miR167a	CAS1	Terpenoid cyclases/protein prenyltransferase alpha-alpha toroid||Squalene cyclase||Prenyltransferase/squalene oxidase||Terpene synthase, conserved site
VIT_05s0094g00950	vvi-miR3629a-3p	BT3	Zinc finger, TAZ-type||BTB/POZ||BTB/POZ-like||BTB/POZ fold
VIT_16s0039g01860	vvi-miR3629a-5p	BPA1	Nucleotide-binding, alpha-beta plait||RNA recognition motif domain
VIT_06s0004g02580	vvi-miR169d	BLH8	Homeobox KN domain||Homeodomain-like||Homeodomain||POX
VIT_05s0102g00090	vvi-miR3629a-5p	BIO2	Radical SAM||Aldolase-type TIM barrel||Elongator protein 3/MiaB/NifB||Biotin synthase/Biotin biosynthesis bifunctional protein BioAB||Biotin/thiamin synthesis-associated protein||Biotin synthase
VIT_11s0052g01390	vvi-miR396a,vvi-miR396b	BIO1	Pyridoxal phosphate-dependent transferase, major region, subdomain 1||Aminotransferase class-III||Pyridoxal phosphate-dependent transferase||Pyridoxal phosphate-dependent transferase, major region, subdomain 2||P-loop containing nucleoside triphosphate hydrolase
VIT_14s0083g00960	vvi-miR3639-3p	BIG	Zinc finger, ZZ-type||WD40-repeat-containing domain||Zinc finger, N-recognin||Armadillo-type fold||E3 ubiquitin ligase, UBR4||Zinc finger, N-recognin, metazoa
VIT_18s0001g13230	vvi-miR156b	BGAL5	Glycoside hydrolase, catalytic domain||Glycoside hydrolase, family 35||D-galactoside/L-rhamnose binding SUEL lectin domain||Galactose-binding domain-like||Glycoside hydrolase, family 35, conserved site||Glycoside hydrolase, superfamily
VIT_03s0017g00550	vvi-miR2111-5p	BETA-UP	Carbon-nitrogen hydrolase
VIT_19s0015g00500	vvi-miR159c,vvi-miR319e	BAM4	Glycoside hydrolase, catalytic domain||Glycoside hydrolase, family 14||Glycoside hydrolase, family 14B, plant||Glycoside hydrolase, superfamily
VIT_15s0046g02620	vvi-miR845a	BAM2	Glycoside hydrolase, superfamily||Glycoside hydrolase, family 14, conserved site||Glycoside hydrolase, catalytic domain||Glycoside hydrolase, family 14||Glycoside hydrolase, family 14B, plant
VIT_15s0046g01560	vvi-miR3629a-5p	BAG6	BAG domain||IQ motif, EF-hand binding site
VIT_06s0009g01130	vvi-miR2950-5p	B73	Molybdopterin binding domain||MoeA, N-terminal and linker domain||MoeA, C-terminal, domain IV||Molybdenum cofactor biosynthesis, conserved site
VIT_17s0000g10090	vvi-miR396b,vvi-miR396a	AZG2	Adenine/guanine permease AZG2||Xanthine/uracil/vitamin C permease
VIT_16s0098g01510	vvi-miR3629a-5p	ATXR6	Zinc finger, PHD-finger||Zinc finger, PHD-type, conserved site||Zinc finger, FYVE/PHD-type||Zinc finger, RING/FYVE/PHD-type||Zinc finger, PHD-type||SET domain
VIT_07s0104g00060	vvi-miR156a	ATXPD	DNA helicase (DNA repair), Rad3 type||DEAD2||ATP-dependent helicase, C-terminal||DNA/RNA helicase, ATP-dependent, DEAH-box type, conserved site||Domain of unknown function DUF1227||P-loop containing nucleoside triphosphate hydrolase||Helicase, superfamily 1/2, ATP-binding domain, DinG/Rad3-type||Xeroderma pigmentosum group D protein||Helicase-like, DEXD box c2 type
VIT_10s0092g00350	vvi-miR3625-5p	ATVPS54	Vacuolar protein sorting-associated protein 54||Vps54-like
VIT_06s0080g00800	vvi-miR159a	ATVAMP714	Longin-like domain||Longin domain||Synaptobrevin
VIT_02s0025g04490	vvi-miR3629a-3p	ATUTR2	UAA transporter
VIT_01s0010g01210	novel_141	ATUNG	Uracil-DNA glycosylase, active site||Uracil-DNA glycosylase-like||Uracil-DNA glycosylase
VIT_10s0003g03180	vvi-miR845d,vvi-miR845c	ATTRANS11	Ribosomal protein S11||Phospho-N-acetylmuramoyl-pentapeptide transferase, conserved site||Glycosyl transferase, family 4||Ribosomal S11, conserved site||Phospho-N-acetylmuramoyl-pentapeptide transferase
VIT_12s0028g00300	vvi-miR3626-3p	ATTOC64-V	Tetratricopeptide TPR-1||Amidase signature domain||Tetratricopeptide repeat-containing domain||Tetratricopeptide-like helical||Amidase||Tetratricopeptide repeat
VIT_19s0014g01250	vvi-miR2950-5p	AtTLP7	Tubby C-terminal-like domain||Tubby, C-terminal, conserved site||F-box domain, cyclin-like||Tubby, C-terminal
VIT_15s0021g02230	vvi-miR3631b-3p,vvi-miR3631a-3p	ATTCP-1	T-complex protein 1, alpha subunit||GroEL-like equatorial domain||Chaperone, tailless complex polypeptide 1||GroEL-like apical domain||Chaperonin TCP-1, conserved site||TCP-1-like chaperonin intermediate domain||Chaperonin Cpn60/TCP-1
VIT_10s0003g02880	vvi-miR319e,novel_141,vvi-miR159c,vvi-miR845d	ATSS4	Starch synthase, catalytic domain||Glycosyl transferase, family 1||Glycogen/starch synthases, ADP-glucose type
VIT_04s0043g00270	vvi-miR3629a-3p	ATSRL1	Pre-mRNA-splicing factor 38
VIT_05s0029g01140	vvi-miR3629a-5p	ATSPS3F	Glycosyl transferase, family 1||Glycosyltransferase subfamily 4, N-terminal domain||Sucrose-phosphate synthase||Sucrose phosphate synthase, plant
VIT_02s0025g03400	vvi-miR3629a-5p	ATSPPL2	Peptidase A22B, signal peptide peptidase||Protease-associated domain, PA||Peptidase A22, presenilin signal peptide
VIT_16s0050g00580	vvi-miR3629a-5p	ATSPPL1	Peptidase A22, presenilin signal peptide||Peptidase A22B, signal peptide peptidase
VIT_14s0066g00830	vvi-miR3629a-3p	ATSIRB	Cobalamin (vitamin B12) biosynthesis CbiX
VIT_18s0001g10520	novel_141	ATSCP2	SCP2 sterol-binding domain
VIT_11s0016g03870	vvi-miR3629a-5p,vvi-miR3629a-3p	ATSBT6.1	Peptidase S8/S53 domain||Peptidase S8, subtilisin, His-active site||Peptidase S8, subtilisin, Ser-active site||Peptidase S8, subtilisin-related
VIT_14s0081g00460	vvi-miR3623-3p	ATSAC1	Phosphoinositide phosphatase SAC||Synaptojanin, N-terminal
VIT_02s0012g02160	vvi-miR3629a-5p	ATS1	Glycerol-3-phosphate O-acyltransferase, chloroplast||Phospholipid/glycerol acyltransferase||Glycerol-3-phosphate O-acyltransferase, alpha helical bundle, N-terminal
VIT_18s0166g00180	novel_141	ATRZ-1A	Nucleotide-binding, alpha-beta plait||Zinc finger, CCHC-type||RNA recognition motif domain
VIT_14s0036g01460	vvi-miR164a,vvi-miR319e,vvi-miR159c,vvi-miR169b	ATRX	Helicase, superfamily 1/2, ATP-binding domain||Helicase, C-terminal||SNF2-related||ADD domain||P-loop containing nucleoside triphosphate hydrolase
VIT_02s0087g00460	vvi-miR171a	ATROPGEF14	Plant specific Rop nucleotide exchanger, PRONE||Nucleotide-binding, alpha-beta plait||RNA recognition motif domain||Oxoglutarate/iron-dependent dioxygenase||Alpha-ketoglutarate-dependent dioxygenase AlkB-like
VIT_10s0003g04000	novel_141	ATRH1	Helicase, superfamily 1/2, ATP-binding domain||Helicase, C-terminal||P-loop containing nucleoside triphosphate hydrolase||DNA/RNA helicase, DEAD/DEAH box type, N-terminal
VIT_17s0000g05140	vvi-miR3629a-3p	ATRBL12	Peptidase S54, rhomboid domain||Peptidase S54, rhomboid
VIT_15s0048g00380	vvi-miR156a	ATRAD51C	DNA recombination and repair protein, RecA-like||DNA recombination/repair protein RecA/RadB, ATP-binding domain||DNA recombination and repair protein Rad51, C-terminal||P-loop containing nucleoside triphosphate hydrolase
VIT_07s0141g00770	vvi-miR3629a-5p	AtRABA5b	Small GTPase superfamily, Ras type||Small GTPase superfamily, Rab type||Small GTPase superfamily||Ran GTPase||P-loop containing nucleoside triphosphate hydrolase||Small GTP-binding protein domain||Small GTPase superfamily, Rho type
VIT_07s0031g01720	vvi-miR3631a-3p	ATRAB7A	Small GTPase superfamily, Rab type||Small GTPase superfamily||Small GTPase superfamily, Ras type||P-loop containing nucleoside triphosphate hydrolase||Ran GTPase||Small GTP-binding protein domain||Small GTPase superfamily, Rho type
VIT_18s0001g07630	novel_141	ATR1	Flavodoxin||NADPH-cytochrome p450 reductase, FAD-binding, alpha-helical domain-3||Flavoprotein-like||Oxidoreductase FAD/NAD(P)-binding||FAD-binding, type 1||Riboflavin synthase-like beta-barrel||Flavodoxin/nitric oxide synthase||Flavoprotein pyridine nucleotide cytochrome reductase||Ferredoxin reductase-type FAD-binding domain||NADPH-cytochrome P450 reductase
VIT_16s0050g01140	vvi-miR166a	ATQC	Glutamine cyclotransferase||WD40/YVTN repeat-like-containing domain
VIT_13s0019g04710	vvi-miR3629a-3p	ATPUB14	U box domain||Armadillo||Armadillo-like helical||Armadillo-type fold||Zinc finger, RING/FYVE/PHD-type
VIT_13s0019g05160	novel_141,vvi-miR396b	ATPU1	Glycoside hydrolase, family 13||Glycoside hydrolase, family 13, N-terminal||Alpha-1,6-glucosidases, pullulanase-type, C-terminal||Immunoglobulin-like fold||Glycoside hydrolase, superfamily||Glycoside hydrolase, catalytic domain||Immunoglobulin E-set||Alpha-1,6-glucosidases, pullulanase-type
VIT_18s0072g00830	novel_141	ATPS1	PIN domain||Forkhead-associated (FHA) domain||PIN domain-like||SMAD/FHA domain
VIT_18s0001g08680	vvi-miR3635-3p	ATPRP40A	WW domain||Pre-mRNA-processing protein PRP40||FF domain
VIT_13s0019g03860	vvi-miR3629a-5p	ATPQ	ATPase, F0 complex, subunit D, mitochondrial
VIT_14s0066g01000	vvi-miR3626-3p	ATPPT2	Drug/metabolite transporter||Domain of unknown function DUF250||Tpt phosphate/phosphoenolpyruvate translocator
VIT_06s0004g03250	vvi-miR3639-3p	ATPDIL5-1	Thioredoxin-like fold||Thioredoxin domain
VIT_06s0004g02890	vvi-miR3629a-5p	ATPDIL1-4	Protein disulphide isomerase||Thioredoxin domain||Thioredoxin-like fold||Disulphide isomerase||Thioredoxin, conserved site
VIT_05s0062g01220	vvi-miR159c,vvi-miR319e,vvi-miR3638-3p	AT-P4H-1	Oxoglutarate/iron-dependent dioxygenase||Prolyl 4-hydroxylase, alpha subunit
VIT_01s0127g00070	vvi-miR172c,vvi-miR172b,vvi-miR172a	ATNRT2.5	Major facilitator superfamily||Major facilitator superfamily domain
VIT_14s0060g00720	vvi-miR393b	ATNAP9	P-loop containing nucleoside triphosphate hydrolase||ABC transporter-like||AAA+ ATPase domain
VIT_14s0068g01730	vvi-miR159c,vvi-miR319e	ATNAP14	AAA+ ATPase domain||ABC transporter-like||P-loop containing nucleoside triphosphate hydrolase
VIT_04s0044g01320	vvi-miR845a	ATNAP13	AAA+ ATPase domain||P-loop containing nucleoside triphosphate hydrolase||ABC transporter, conserved site||ABC transporter-like
VIT_08s0007g04830	vvi-miR828a	AtMYB27	Myb domain||SANT/Myb domain||Homeodomain-like
VIT_15s0046g03190	vvi-miR3629a-3p	AtMYB17	Myb domain||SANT/Myb domain||Homeodomain-like
VIT_09s0018g00310	vvi-miR845d,vvi-miR845c,vvi-miR159c,vvi-miR396b,vvi-miR394b,vvi-miR396a,vvi-miR319e	ATMRP11	AAA+ ATPase domain||P-loop containing nucleoside triphosphate hydrolase||Reverse transcriptase, RNA-dependent DNA polymerase||ABC transporter, transmembrane domain, type 1||ABC transporter, conserved site||ABC transporter-like
VIT_01s0011g04920	vvi-miR3629a-5p	ATMPK17	Protein kinase, ATP binding site||Protein kinase-like domain||Mitogen-activated protein (MAP) kinase, conserved site||Serine/threonine- / dual specificity protein kinase, catalytic domain||Protein kinase, catalytic domain
VIT_00s0194g00260	novel_141	ATMAP70-5	Myosin II heavy chain-like
VIT_19s0014g03740	vvi-miR3629a-3p	ATMAMI	Major sperm protein||PapD-like||Vesicle-associated membrane protein
VIT_11s0052g00070	vvi-miR845c,vvi-miR845d	ATLIG4	DNA ligase 4||BRCT domain||Nucleic acid-binding, OB-fold||DNA ligase, ATP-dependent, central||DNA ligase, ATP-dependent, C-terminal||DNA ligase, ATP-dependent, conserved site||DNA ligase, ATP-dependent, N-terminal||DNA ligase, ATP-dependent
VIT_07s0130g00350	vvi-miR159c	ATLCB1	Pyridoxal phosphate-dependent transferase, major region, subdomain 2||Pyridoxal phosphate-dependent transferase||Pyridoxal phosphate-dependent transferase, major region, subdomain 1||Aminotransferase, class I/classII
VIT_04s0023g00940	vvi-miR3629a-5p	ATLCAT3	Alpha/Beta hydrolase fold||Lecithin:cholesterol/phospholipid:diacylglycerol acyltransferase
VIT_11s0016g02400	vvi-miR167a,vvi-miR167b,vvi-miR167c	ATKEA4	Cation/H+ exchanger
VIT_18s0001g06970	vvi-miR319e,vvi-miR159c,vvi-miR845c,vvi-miR845a	ATJ1	Chaperone DnaJ, C-terminal||HSP40/DnaJ peptide-binding||DnaJ domain||Heat shock protein DnaJ, cysteine-rich domain
VIT_05s0094g01410	vvi-miR845a,vvi-miR3631a-3p,vvi-miR159c	AtITPK4	Inositol-tetrakisphosphate 1-kinase||Inositol-tetrakisphosphate 1-kinase 4
VIT_18s0001g06520	vvi-miR2950-5p,vvi-miR319e,vvi-miR159c	ATISA3	Glycosyl hydrolase, family 13, catalytic domain||Glycoside hydrolase, family 13||Glycoside hydrolase, family 13, N-terminal||Immunoglobulin-like fold||Glycoside hydrolase, superfamily||Glycoside hydrolase, catalytic domain||Immunoglobulin E-set||Glycosyl hydrolase, family 13, subfamily, catalytic domain||Glycosyl hydrolase, family 13, all-beta
VIT_14s0060g01080	vvi-miR3629a-5p	ATIREG3	Ferroporti-1||Major facilitator superfamily domain
VIT_01s0010g02100	novel_141,vvi-miR156a	AtIDD5	Zinc finger, C2H2-like||C2H2 zinc finger protein, plant||Zinc finger C2H2-type/integrase DNA-binding domain||Zinc finger, C2H2
VIT_03s0063g00280	vvi-miR3629a-5p	ATHM3	Thioredoxin-like fold||Thioredoxin||Thioredoxin domain||Thioredoxin, conserved site
VIT_06s0004g01270	vvi-miR394b	ATGSL12	1,3-beta-glucan synthase subunit FKS1-like, domain-1||Callose synthase||Glycosyl transferase, family 48||Vacuolar protein sorting-associate protein Vta1/Callose synthase, N-terminal domain
VIT_05s0051g00870	vvi-miR156e,vvi-miR156b	ATGR1	Pyridine nucleotide-disulphide oxidoreductase, NAD-binding domain||Pyridine nucleotide-disulphide oxidoreductase, FAD/NAD(P)-binding domain||Glutathione-disulphide reductase||FAD/NAD-linked reductase, dimerisation||Pyridine nucleotide-disulphide oxidoreductase, dimerisation||Pyridine nucleotide-disulphide oxidoreductase, class I, active site
VIT_13s0019g02720	vvi-miR169r,vvi-miR3629a-5p	ATGC1	Guanylyl cyclase
VIT_08s0105g00590	vvi-miR845c	ATG4	Bacteriochlorophyll/chlorophyll synthetase||UbiA prenyltransferase family||Chlorophyll synthase, ChlG
VIT_18s0001g02630	novel_141	ATFBP7	F-box domain, cyclin-like
VIT_02s0012g01000	vvi-miR3631b-3p	ATEYA	HAD-like domain||Eyes absent family||EYA
VIT_13s0073g00170	vvi-miR3629a-3p	ATEXO70A1	Cullin repeat-like-containing domain||Exocyst complex protein Exo70
VIT_19s0027g01660	vvi-miR3629a-5p	ATCYP59	Cyclophilin-type peptidyl-prolyl cis-trans isomerase||Cyclophilin-like domain||Cyclophilin-like peptidyl-prolyl cis-trans isomerase domain||Zinc finger, CCHC-type||Nucleotide-binding, alpha-beta plait||RNA recognition motif domain
VIT_01s0146g00110	vvi-miR394b	ATCYP20-2	Cyclophilin-like domain||Cyclophilin-type peptidyl-prolyl cis-trans isomerase||Cyclophilin-type peptidyl-prolyl cis-trans isomerase, conserved site||Cyclophilin-like peptidyl-prolyl cis-trans isomerase domain
VIT_11s0065g00930	vvi-miR845d	ATCNGC17	RmlC-like jelly roll fold||Cyclic nucleotide-binding domain||Cyclic nucleotide-binding-like
VIT_04s0008g06570	vvi-miR3629a-5p	ATCM2	Chorismate mutase, type II||Chorismate mutase, AroQ class, eukaryotic type
VIT_00s0252g00040	novel_141	ATCKX1	FAD linked oxidase, N-terminal||FAD-linked oxidase-like, C-terminal||Oxygen oxidoreductase covalent FAD-binding site||Cytokinin dehydrogenase 1, FAD/cytokinin binding domain||CO dehydrogenase flavoprotein-like, FAD-binding, subdomain 2||FAD-binding, type 2, subdomain 1||FAD-binding, type 2||Vanillyl-alcohol oxidase/Cytokinin dehydrogenase C-terminal domain
VIT_05s0029g01210	vvi-miR477b-3p	ATCES1	Ceramidase
VIT_14s0036g00510	vvi-miR396a,vvi-miR396b	ATCDC5	Domain of unknown function DUF3351||Homeodomain-like||Myb domain||SANT/Myb domain
VIT_03s0063g00600	vvi-miR3634-5p	ATATG2	Vacuolar protein sorting-associated protein 13A N-terminal domain||Autophagy-related, C-terminal||Autophagy-related protein 2
VIT_17s0000g04010	vvi-miR169b	ATARP4	Actin-related protein||Actin-related protein 4 (Arp4)
VIT_04s0023g01300	vvi-miR394b	ATAPP1	Peptidase M24B, X-Pro dipeptidase/aminopeptidase P, conserved site||Creatinase/Aminopeptidase P/Spt16, N-terminal||Peptidase M24, structural domain||Creatinase||Creatinase/Aminopeptidase P, N-terminal
VIT_01s0011g01290	vvi-miR3629a-3p	ATAAH	ArgE/DapE/ACY1/CPG2/YscS, conserved site||Peptidase M20||Peptidase M20, dimerisation domain||Amidase, hydantoinase/carbamoylase
VIT_10s0003g02700	vvi-miR845a	AT PRP39-2	RNA-processing protein, HAT helix
VIT_07s0031g00940	vvi-miR395a	AST68	Sulphate anion transporter, conserved site||Sulfate transporter N-terminal domain with GLY motif||STAS domain||Sulphate anion transporter||Plant low affinity sulfate transporter||Sulphate transporter
VIT_18s0001g04890	vvi-miR395a	AST56	Sulphate transporter||Sulphate anion transporter||Plant low affinity sulfate transporter||Sulfate transporter N-terminal domain with GLY motif||STAS domain||Sulphate anion transporter, conserved site
VIT_07s0005g06460	vvi-miR408	ARPN	Cupredoxin||Plastocyanin-like
VIT_10s0003g04100	vvi-miR167c	ARF6	Phox/Bem1p||AUX/IAA protein||DNA-binding pseudobarrel domain||Auxin response factor||B3 DNA binding domain
VIT_04s0008g07360	vvi-miR482	ARF3	Small GTPase superfamily, ARF/SAR type||Small GTPase superfamily, ARF type||P-loop containing nucleoside triphosphate hydrolase||Small GTPase superfamily, SAR1-type||Small GTP-binding protein domain
VIT_13s0019g04380	vvi-miR160a,vvi-miR160c,vvi-miR3629a-3p	ARF16	AUX/IAA protein||Phox/Bem1p||DNA-binding pseudobarrel domain||B3 DNA binding domain||Auxin response factor
VIT_06s0004g02750	vvi-miR160a,vvi-miR160c	ARF10	Auxin response factor||DNA-binding pseudobarrel domain||B3 DNA binding domain||Phox/Bem1p||AUX/IAA protein
VIT_12s0055g00490	vvi-miR845d	ARC5	P-loop containing nucleoside triphosphate hydrolase||Dynamin-type guanine nucleotide-binding (G) domain||Dynamin, GTPase domain||Dynamin
VIT_18s0001g13460	vvi-miR3629a-5p	AP3	Transcription factor, K-box||Transcription factor, MADS-box
VIT_12s0142g00430	vvi-miR319e,vvi-miR159c	AOX2	Alternative oxidase
VIT_14s0066g01240	vvi-miR3629a-3p	AO	Fumarate reductase/succinate dehydrogenase flavoprotein-like, C-terminal||L-aspartate oxidase||FAD binding domain||Succinate dehydrogenase/fumarate reductase flavoprotein, catalytic domain
VIT_14s0081g00200	vvi-miR3629a-3p	AN3	SSXT
VIT_14s0068g00210	vvi-miR845d,vvi-miR169r,vvi-miR845a,vvi-miR845c	ALS1	AAA+ ATPase domain||P-loop containing nucleoside triphosphate hydrolase||ABC transporter-like||ABC transporter, transmembrane domain, type 1||ABC transporter, conserved site
VIT_00s0189g00030	vvi-miR319e,vvi-miR159c	ALA3	P-type ATPase, phosphorylation site||P-type ATPase, A domain||Cation-transporting P-type ATPase||Phospholipid-transporting P-type ATPase, subfamily IV||HAD-like domain||P-type ATPase, cytoplasmic domain N
VIT_10s0003g04560	vvi-miR319e,vvi-miR159c	AIR9	Leucine-rich repeat
VIT_19s0014g03380	vvi-miR3629a-5p	AHL	Inositol monophosphatase||Inositol monophosphatase, metal-binding site||Inositol monophosphatase, conserved site||3(2),5 -bisphosphate nucleotidase HAL2
VIT_12s0057g00690	vvi-miR3631b-3p	AHK2	Signal transduction histidine kinase, core||Signal transduction histidine kinase, homodimeric domain||Histidine kinase-like ATPase, ATP-binding domain||Signal transduction histidine kinase, subgroup 1, dimerisation/phosphoacceptor domain||Signal transduction response regulator, receiver domain||CheY-like superfamily||CHASE||Signal transduction histidine kinase-related protein, C-terminal
VIT_09s0002g02260	vvi-miR3629a-3p	AHA9	Cation-transporting P-type ATPase, N-terminal||Cation-transporting P-type ATPase||P-type ATPase, transmembrane domain||P-type ATPase, phosphorylation site||P-type ATPase, A domain||HAD-like domain||P-type ATPase, cytoplasmic domain N||H+ transporting P-type ATPase, subfamily IIIA
VIT_18s0041g02140	novel_141	AGL12	Transcription factor, MADS-box||Transcription factor, K-box
VIT_05s0020g02880	vvi-miR159c	ADG2	Glucose-1-phosphate adenylyltransferase||ADP-glucose pyrophosphorylase, conserved site||Nucleotide-diphospho-sugar transferases||Trimeric LpxA-like||Nucleotidyl transferase
VIT_07s0005g03310	vvi-miR3629a-3p	ADF6	ADF-H/Gelsolin-like domain||Actin-binding, cofilin/tropomyosin type||ADF/Cofilin/Destrin
VIT_01s0244g00030	vvi-miR3626-3p	ACP4	Acyl carrier protein (ACP)||Polyketide synthase, phosphopantetheine-binding domain||Phosphopantetheine attachment site||Acyl carrier protein-like
VIT_09s0018g02130	vvi-miR3633a-5p	ACA9	Cation-transporting P-type ATPase, C-terminal||Cation-transporting P-type ATPase, N-terminal||P-type ATPase, phosphorylation site||P-type ATPase, transmembrane domain||P-type ATPase, A domain||Cation-transporting P-type ATPase||Calcium-transporting P-type ATPase, N-terminal autoinhibitory domain||HAD-like domain||P-type ATPase, cytoplasmic domain N||Calcium-transporting P-type ATPase, subfamily I…
VIT_08s0007g03420	vvi-miR166a	ABI5	Basic-leucine zipper domain||Protein ABSCISIC ACID-INSENSITIVE 5
VIT_00s0125g00210	vvi-miR3633a-5p	-	Protein kinase, ATP binding site||Serine/threonine- / dual specificity protein kinase, catalytic domain||Serine/threonine-protein kinase, active site||Protein kinase-like domain||Concanavalin A-like lectin/glucanase, subgroup||Protein kinase, catalytic domain||Serine-threonine/tyrosine-protein kinase catalytic domain||Malectin
VIT_00s0125g00260	vvi-miR169o	-	Vacuolar sorting protein 39/Transforming growth factor beta receptor-associated domain 2||Citron-like||Vacuolar sorting protein 39/Transforming growth factor beta receptor-associated domain 1||Clathrin, heavy chain/VPS, 7-fold repeat
VIT_00s0125g00430	vvi-miR159a	-	GB1/RHD3-type guanine nucleotide-binding (G) domain||P-loop containing nucleoside triphosphate hydrolase||Root hair defective 3 GTP-binding
VIT_00s0131g00210	vvi-miR159a	-	Annexin repeat
VIT_00s0144g00080	vvi-miR845c,vvi-miR845d	-	Zinc finger, CCHC-type
VIT_00s0144g00210	vvi-miR3639-3p	-	CCR4-Not complex component, Not1, C-terminal||Glycosyl transferase, family 35
VIT_00s0144g00260	vvi-miR845a,vvi-miR845d,vvi-miR845c	-	Ribosomal protein, zinc-binding domain||Ribosomal protein S27a
VIT_00s0179g00140	vvi-miR3633a-5p	-	Protein phosphatase 2C||Protein phosphatase 2C (PP2C)-like
VIT_00s0179g00190	vvi-miR3626-5p	-	JmjC domain
VIT_00s0179g00260	vvi-miR396b	-	P-type ATPase, transmembrane domain||P-type ATPase, phosphorylation site||P-type ATPase, A domain||Cation-transporting P-type ATPase||HAD-like domain||Cation-transporting P-type ATPase, C-terminal||Cation-transporting P-type ATPase, N-terminal||Calcium-transporting P-type ATPase, subfamily IIB||P-type ATPase, cytoplasmic domain N
VIT_00s0179g00280	novel_141	-	EF-hand-like domain||Calcium-binding EF-hand||EF-Hand 1, calcium-binding site
VIT_00s0179g00340	vvi-miR3629a-3p	-	Histone core||Histone H2A||Histone-fold
VIT_00s0181g00250	vvi-miR3629a-3p	-	Diacylglycerol kinase, catalytic domain||ATP-NAD kinase-like domain
VIT_00s0198g00170	vvi-miR159c,vvi-miR319g,vvi-miR319e,vvi-miR319b,vvi-miR845d,vvi-miR395a	-	ATPase, AAA-type, core||P-loop containing nucleoside triphosphate hydrolase||AAA+ ATPase domain
VIT_00s0202g00050	vvi-miR845d,vvi-miR845a	-	PGG domain
VIT_00s0203g00160	vvi-miR172b	-	Cyclin, C-terminal domain||Cyclin-like||Cyclin, N-terminal||Cyclin D, plant
VIT_00s0204g00210	vvi-miR2950-5p	-	PGG domain||Ankyrin repeat-containing domain||Ankyrin repeat
VIT_00s0204g00220	vvi-miR396b,vvi-miR396a	-	ClpP||ClpP/TepA||ClpP/crotonase-like domain
VIT_00s0211g00020	vvi-miR3624-5p	-	ABC transporter-like||P-loop containing nucleoside triphosphate hydrolase
VIT_00s0213g00020	vvi-miR845d	-	P-loop containing nucleoside triphosphate hydrolase
VIT_00s0214g00110	vvi-miR156f	-	F-box domain, cyclin-like
VIT_00s0218g00050	vvi-miR3629a-5p	-	Kinesin, motor region, conserved site||P-loop containing nucleoside triphosphate hydrolase||Kinesin-like protein||Malectin||Kinesin, motor domain
VIT_00s0220g00090	vvi-miR3631b-3p,vvi-miR3631a-3p,vvi-miR845d	-	Calcium-binding EF-hand||LETM1-like||EF-hand-like domain
VIT_00s0222g00100	vvi-miR319b,vvi-miR319e	-	Leucine-rich repeat||Leucine rich repeat 4
VIT_00s0225g00110	vvi-miR172b,vvi-miR172a	-	Sel1-like||F-box domain, cyclin-like||Tetratricopeptide repeat-containing domain||Tetratricopeptide-like helical
VIT_00s0226g00040	novel_141	-	Homeodomain-like||Protein of unknown function DUF3755||SANT/Myb domain
VIT_00s0226g00070	vvi-miR159a	-	Transcription factor GRAS||Protein short-root
VIT_00s0229g00100	vvi-miR3623-5p	-	GDP-fucose protein O-fucosyltransferase||O-fucosyltransferase, plant
VIT_00s0231g00050	vvi-miR845d,vvi-miR845a	-	P-loop containing nucleoside triphosphate hydrolase
VIT_00s0238g00130	vvi-miR172d	-	P-loop containing nucleoside triphosphate hydrolase||Toll/interleukin-1 receptor homology (TIR) domain||Leucine-rich repeat, typical subtype||Leucine-rich repeat||NB-ARC
VIT_00s0256g00030	vvi-miR3631b-3p	-	Ankyrin repeat-containing domain||Caskin/Ankyrin repeat-containing protein||Ankyrin repeat||PGG domain
VIT_00s0259g00070	vvi-miR3624-3p	-	Heavy metal-associated domain, HMA
VIT_00s0259g00100	vvi-miR3624-3p	-	Heavy metal-associated domain, HMA
VIT_00s0262g00130	vvi-miR156b	-	Gnk2-homologous domain
VIT_00s0265g00020	vvi-miR394b,vvi-miR845d	-	Cysteinyl-tRNA synthetase/mycothiol ligase||Cysteine-tRNA ligase||Aminoacyl-tRNA synthetase, class 1a, anticodon-binding||Rossmann-like alpha/beta/alpha sandwich fold
VIT_00s0266g00030	vvi-miR3633a-5p	-	Serine/threonine-protein kinase, active site||Serine/threonine- / dual specificity protein kinase, catalytic domain||Protein kinase, ATP binding site||Protein kinase-like domain||Serine-threonine/tyrosine-protein kinase catalytic domain||Protein kinase, catalytic domain||Concanavalin A-like lectin/glucanase, subgroup
VIT_00s0266g00090	vvi-miR3633a-5p	-	Concanavalin A-like lectin/glucanase, subgroup||Protein kinase, catalytic domain||Serine-threonine/tyrosine-protein kinase catalytic domain||Protein kinase, ATP binding site||Protein kinase-like domain||Serine/threonine-protein kinase, active site||Serine/threonine- / dual specificity protein kinase, catalytic domain
VIT_00s0270g00090	novel_141	-	Pentatricopeptide repeat
VIT_00s0271g00020	vvi-miR3633a-5p	-	Protein kinase, catalytic domain||Protein kinase-like domain||Serine/threonine-protein kinase, active site
VIT_00s0274g00080	vvi-miR399d	-	Flavoprotein WrbA||Flavodoxin/nitric oxide synthase||NADPH-dependent FMN reductase||Flavoprotein-like
VIT_00s0282g00040	vvi-miR3639-3p	-	Major facilitator superfamily domain||Major facilitator superfamily
VIT_00s0286g00140	vvi-miR3633a-5p	-	PAN-2 domain||Serine/threonine- / dual specificity protein kinase, catalytic domain||Serine/threonine-protein kinase, active site||Bulb-type lectin domain||S-locus glycoprotein||Protein kinase, ATP binding site||Epidermal growth factor-like domain||Protein kinase-like domain||EGF-type aspartate/asparagine hydroxylation site||Serine-threonine/tyrosine-protein kinase catalytic domain||Apple-like||C…
VIT_00s0288g00010	vvi-miR3623-5p	-	AAA+ ATPase domain||NB-ARC||Toll/interleukin-1 receptor homology (TIR) domain||P-loop containing nucleoside triphosphate hydrolase
VIT_00s0288g00040	vvi-miR3623-5p	-	Toll/interleukin-1 receptor homology (TIR) domain
VIT_00s0301g00110	vvi-miR3629a-5p	-	S1/P1 nuclease||Phospholipase C/P1 nuclease domain
VIT_00s0304g00060	vvi-miR396b,vvi-miR3631a-3p	-	Tetratricopeptide repeat-containing domain||Tetratricopeptide TPR-1||Thioredoxin domain||Tetratricopeptide repeat||Tetratricopeptide-like helical||Tetratricopeptide TPR2||Thioredoxin-like fold
VIT_00s0324g00010	vvi-miR535a	-	Leucine-rich repeat-containing N-terminal, type 2||Leucine-rich repeat, typical subtype||Leucine-rich repeat
VIT_00s0333g00060	novel_141	-	Pathogenic type III effector avirulence factor Avr cleavage site
VIT_00s0337g00010	vvi-miR156f	-	Stm1, N-terminal
VIT_00s0341g00030	vvi-miR3639-3p	-	Mitochondrial biogenesis protein AIM24||Tryptophan RNA-binding attenuator protein-like domain
VIT_00s0341g00050	vvi-miR828a	-	Homeodomain-like||Myb domain||SANT/Myb domain
VIT_00s0346g00090	vvi-miR3631a-5p	-	Alcohol dehydrogenase superfamily, zinc-type||Alcohol dehydrogenase GroES-like||NAD(P)-binding domain||GroES-like||Polyketide synthase, enoylreductase||Alcohol dehydrogenase, C-terminal
VIT_00s0357g00120	vvi-miR396a,vvi-miR396b	-	Ethylene insensitive 3-like protein, DNA-binding domain
VIT_00s0404g00040	vvi-miR159c,vvi-miR319e	-	Arf GTPase activating protein
VIT_00s0404g00060	vvi-miR156a	-	RNA-processing protein, HAT helix||Tetratricopeptide-like helical
VIT_00s0414g00030	vvi-miR845c,vvi-miR845d	-	Nucleotide-diphospho-sugar transferases||Cellulose synthase
VIT_00s0494g00020	vvi-miR845d	-	Thioredoxin-like fold
VIT_00s0590g00020	vvi-miR156f	-	Stm1, N-terminal
VIT_00s0595g00010	vvi-miR3633a-5p	-	Serine/threonine-protein kinase, active site||PAN-2 domain||Serine/threonine- / dual specificity protein kinase, catalytic domain||S-locus glycoprotein||Protein kinase, ATP binding site||Protein kinase-like domain||Epidermal growth factor-like domain||Apple-like||Concanavalin A-like lectin/glucanase, subgroup||Protein kinase, catalytic domain
VIT_00s0601g00030	novel_141	-	Small GTP-binding protein domain||Small GTPase superfamily, ARF type||Small GTPase superfamily, ARF/SAR type||P-loop containing nucleoside triphosphate hydrolase||Small GTPase superfamily, SAR1-type||Small GTPase superfamily, Rab type
VIT_00s0630g00010	vvi-miR3629a-5p	-	Alpha/Beta hydrolase fold||Lipase, class 3
VIT_00s0655g00020	vvi-miR845d,vvi-miR845c	-	Domain of unknown function DUF4219
VIT_00s0659g00010	vvi-miR3638-5p	-	HAUS augmin-like complex subunit 3
VIT_00s0698g00010	novel_141	-	Catalase core domain||Catalase, mono-functional, haem-containing||Catalase immune-responsive domain||Catalase-like domain||Catalase haem-binding site||Catalase active site||Catalase, mono-functional, haem-containing, clades 1 and 3
VIT_00s0746g00010	vvi-miR845d,vvi-miR845c	-	Zinc finger, CCHC-type
VIT_00s0753g00010	vvi-miR3624-3p	-	Heavy metal-associated domain, HMA
VIT_00s0776g00020	vvi-miR3629a-5p	-	WD40 repeat||WD40-repeat-containing domain||Katanin p80 subunit B1||G-protein beta WD-40 repeat||WD40/YVTN repeat-like-containing domain||WD40 repeat, conserved site
VIT_00s0871g00010	vvi-miR845c,vvi-miR845d	-	Gag-polypeptide of LTR copia-type
VIT_00s0897g00010	vvi-miR535a	-	Leucine-rich repeat||Leucine rich repeat 4
VIT_00s0960g00010	vvi-miR3629a-5p	-	Aldolase-type TIM barrel
VIT_00s1220g00010	vvi-miR845d	-	Calcium-binding EF-hand||EF-hand-like domain
VIT_00s1247g00020	vvi-miR156e	-	Ribosomal protein L25, beta domain||Ribosomal protein L25/Gln-tRNA synthetase, beta-barrel domain||Ribosomal protein L25/Gln-tRNA synthetase, anti-codon-binding domain
VIT_00s1291g00010	vvi-miR3629a-5p	-	AP2-like ethylene-responsive transcription factor||AP2/ERF domain||DNA-binding, integrase-type
VIT_00s1309g00010	vvi-miR166a	-	Cupredoxin||Multicopper oxidase, type 1||Multicopper oxidase, type 3||Multicopper oxidase, type 2
VIT_00s1643g00010	vvi-miR166a	-	Multicopper oxidase, type 2||Multicopper oxidase, type 3||Multicopper oxidase, type 1||Cupredoxin
VIT_00s2255g00010	vvi-miR3623-5p	-	Domain of unknown function DUF1084
VIT_00s2364g00010	vvi-miR477a	-	Armadillo||U box domain||Zinc finger, RING/FYVE/PHD-type||Armadillo-type fold||Armadillo-like helical
VIT_00s2419g00010	vvi-miR3624-3p	-	Heavy metal-associated domain, HMA
VIT_01s0010g00380	vvi-miR477b-3p	-	Leucine-rich repeat||Leucine rich repeat 4||Leucine-rich repeat, typical subtype||Serine/threonine- / dual specificity protein kinase, catalytic domain||Serine/threonine-protein kinase, active site||Leucine-rich repeat-containing N-terminal, type 2||Protein kinase, ATP binding site||Concanavalin A-like lectin/glucanase, subgroup||Protein kinase, catalytic domain||Protein kinase-like domain
VIT_01s0010g00400	vvi-miR3629a-3p	-	WD40-repeat-containing domain||WD40 repeat||WD40/YVTN repeat-like-containing domain
VIT_01s0010g00530	vvi-miR3631b-3p,vvi-miR3631a-3p,vvi-miR3631a-5p	-	UDP-glucuronosyl/UDP-glucosyltransferase
VIT_01s0010g00550	vvi-miR156e	-	Peptidase S9, prolyl oligopeptidase, catalytic domain||Alpha/Beta hydrolase fold||Peptidase S9A, prolyl oligopeptidase||Peptidase S9A, N-terminal domain
VIT_01s0010g00600	vvi-miR477a	-	Phosphatidylinositol 3-/4-kinase, catalytic domain
VIT_01s0010g01200	vvi-miR3629a-5p	-	FAD linked oxidase, N-terminal||FAD-binding, type 2||CO dehydrogenase flavoprotein-like, FAD-binding, subdomain 2
VIT_01s0010g01480	vvi-miR159c,vvi-miR319e	-	BAR domain||Arfaptin homology (AH) domain/BAR domain||Arf GTPase activating protein||Pleckstrin homology-like domain||Pleckstrin homology domain
VIT_01s0010g01740	novel_141	-	Domain of unknown function DUF1084
VIT_01s0010g01830	vvi-miR171h	-	P-loop containing nucleoside triphosphate hydrolase||UvrD-like Helicase, ATP-binding domain||DNA helicase, UvrD-like, C-terminal
VIT_01s0010g01850	vvi-miR845c,vvi-miR845d	-	Tetratricopeptide-like helical||DNA helicase, UvrD-like, C-terminal||UvrD-like Helicase, ATP-binding domain||P-loop containing nucleoside triphosphate hydrolase
VIT_01s0010g02770	vvi-miR159c,vvi-miR319e	-	P-loop containing nucleoside triphosphate hydrolase||Adenylate kinase, subfamily||Adenylate kinase, active site lid domain||Adenylate kinase
VIT_01s0010g02780	vvi-miR156b	-	Helicase, superfamily 1/2, ATP-binding domain||DNA/RNA helicase, ATP-dependent, DEAH-box type, conserved site||Helicase, C-terminal||Helicase-associated domain||P-loop containing nucleoside triphosphate hydrolase||Domain of unknown function DUF1605
VIT_01s0010g03210	vvi-miR159a	-	Leucine-rich repeat
VIT_01s0010g03310	vvi-miR3629a-3p	-	Nucleoporin Nup54/Nup57/Nup44||Nucleoporin Nup54, alpha-helical domain
VIT_01s0010g03380	vvi-miR3629a-5p	-	Ribosomal protein L22/L17||Ribosomal protein L22/L17, eukaryotic/archaeal||Ribosomal protein L22/L17, conserved site
VIT_01s0010g03390	vvi-miR3631a-3p,vvi-miR3629a-5p	-	Peptidase M28
VIT_01s0010g03460	vvi-miR167b,vvi-miR167c	-	S-adenosyl-L-methionine-dependent methyltransferase-like||O-methyltransferase, family 3||EF-Hand 1, calcium-binding site
VIT_01s0010g03660	vvi-miR156e	-	YbeD-like domain||Uncharacterised protein family UPF0250
VIT_01s0010g03710	vvi-miR156a,vvi-miR156e,vvi-miR156f,vvi-miR156b	-	Transcription factor, SBP-box
VIT_01s0010g03730	vvi-miR394b,vvi-miR394a	-	Galactose oxidase, beta-propeller||F-box domain, cyclin-like||Galactose oxidase/kelch, beta-propeller
VIT_01s0010g03820	vvi-miR477b-3p	-	Protein kinase-like domain||Protein kinase, ATP binding site||Serine/threonine- / dual specificity protein kinase, catalytic domain||Serine/threonine-protein kinase, active site||Protein kinase, catalytic domain
VIT_01s0010g03910	vvi-miR156b,vvi-miR156e,vvi-miR156f,vvi-miR156a	-	Transcription factor, SBP-box
VIT_01s0011g00130	vvi-miR395a,vvi-miR156a,vvi-miR156b,vvi-miR156f,vvi-miR156e	-	Transcription factor, SBP-box
VIT_01s0011g00600	vvi-miR3629a-3p	-	Tpt phosphate/phosphoenolpyruvate translocator||Drug/metabolite transporter||Domain of unknown function DUF250
VIT_01s0011g01190	vvi-miR828a	-	Homeodomain-like||SANT/Myb domain||Myb domain
VIT_01s0011g01230	vvi-miR2111-5p	-	GTP-binding protein Era||Era-type guanine nucleotide-binding (G) domain||GTP binding domain||Small GTP-binding protein domain||P-loop containing nucleoside triphosphate hydrolase||K Homology domain, type 2||K homology domain-like, alpha/beta||K homology domain, prokaryotic type
VIT_01s0011g01660	vvi-miR3629a-5p	-	Longin-like domain||Longin domain||Synaptobrevin
VIT_01s0011g01910	vvi-miR408	-	Tetratricopeptide-like helical||Pentatricopeptide repeat
VIT_01s0011g02080	vvi-miR3631b-3p	-	Ribosomal protein, zinc-binding domain||Ribosomal protein L44e
VIT_01s0011g02090	vvi-miR3629a-5p	-	Ribosomal protein L44e||Ribosomal protein, zinc-binding domain
VIT_01s0011g02110	vvi-miR3631a-3p	-	Protein of unknown function DUF597
VIT_01s0011g02160	vvi-miR396b,vvi-miR3631b-3p	-	Zinc finger, RING/FYVE/PHD-type||Zinc finger, RING-type||Histidine kinase-like ATPase, ATP-binding domain
VIT_01s0011g02300	vvi-miR3629a-3p	-	Protein of unknown function DUF2232, membrane
VIT_01s0011g02840	vvi-miR3629a-5p	-	Cytochrome b561, eukaryote||Cytochrome b561/ferric reductase transmembrane
VIT_01s0011g03060	vvi-miR164a,vvi-miR319e,vvi-miR159c	-	Malectin-like carbohydrate-binding domain||Leucine-rich repeat
VIT_01s0011g03160	vvi-miR319e,vvi-miR159c	-	Mediator complex, subunit Med25, von Willebrand factor type A
VIT_01s0011g03190	vvi-miR845a	-	Adaptor protein ClpS, core||Ribosomal protein L7/L12, C-terminal/adaptor protein ClpS-like
VIT_01s0011g03450	vvi-miR156a	-	Glycoside hydrolase, superfamily||Glycoside hydrolase, family 31||Glycosyl hydrolases family 31, active site||Galactose mutarotase-like domain
VIT_01s0011g03560	vvi-miR845d,vvi-miR845a,vvi-miR845c	-	Protein of unknown function DUF1218
VIT_01s0011g03820	vvi-miR845d	-	Zinc finger, RING-type||Zinc finger, CTCHY-type||Haemerythrin/HHE cation-binding motif||Zinc finger, CHY-type||Rubredoxin-type fold||Zinc finger, RING/FYVE/PHD-type
VIT_01s0011g04360	vvi-miR3631b-3p	-	Domain of unknown function DUF1605||P-loop containing nucleoside triphosphate hydrolase||DNA/RNA helicase, DEAD/DEAH box type, N-terminal||Helicase, superfamily 1/2, ATP-binding domain||Helicase, C-terminal||Helicase-associated domain||Double-stranded RNA-binding domain
VIT_01s0011g05350	vvi-miR3629a-5p,vvi-miR3629a-3p	-	Protein kinase-like domain||Serine/threonine-protein kinase, active site||Serine/threonine- / dual specificity protein kinase, catalytic domain||Concanavalin A-like lectin/glucanase, subgroup||Protein kinase, catalytic domain||Serine-threonine/tyrosine-protein kinase catalytic domain
VIT_01s0011g05540	vvi-miR396a,vvi-miR396b	-	Mediator complex, subunit Med23
VIT_01s0011g05630	vvi-miR394b	-	Ubiquitin-conjugating enzyme, E2||Ubiquitin-conjugating enzyme/RWD-like
VIT_01s0011g05910	vvi-miR482	-	S-adenosyl-L-methionine-dependent methyltransferase-like||SAM dependent carboxyl methyltransferase
VIT_01s0011g06050	vvi-miR3629a-5p	-	RNA recognition motif domain||Nucleotide-binding, alpha-beta plait
VIT_01s0011g06070	vvi-miR3631b-3p	-	Membrane protein,Tapt1/CMV receptor
VIT_01s0011g06120	vvi-miR396b,vvi-miR396a	-	THO complex, subunitTHOC2, N-terminal
VIT_01s0011g06240	vvi-miR156b	-	Cytochrome b561, eukaryote||Cytochrome b561/ferric reductase transmembrane
VIT_01s0011g06540	vvi-miR3629a-3p,vvi-miR3629a-5p	-	Major facilitator superfamily domain||Nonaspanin (TM9SF)
VIT_01s0011g06550	vvi-miR319e,vvi-miR159c,vvi-miR394b	-	Cation/H+ exchanger, CPA1 family||Cation/H+ exchanger||Cyclic nucleotide-binding domain||Cyclic nucleotide-binding-like||RmlC-like jelly roll fold
VIT_01s0026g00310	vvi-miR845d,vvi-miR845a	-	Adaptor protein complex AP-1, gamma subunit||Armadillo-like helical||Armadillo-type fold||Coatomer/clathrin adaptor appendage, Ig-like subdomain||Clathrin/coatomer adaptor, adaptin-like, N-terminal||Clathrin adaptor, alpha/beta/gamma-adaptin, appendage, Ig-like subdomain||Clathrin adaptor, gamma-adaptin, appendage
VIT_01s0026g00340	vvi-miR319e,vvi-miR159c	-	Beta-grasp domain||Threonyl/alanyl tRNA synthetase, class II-like, putative editing domain||TGS-like||Threonyl/alanyl tRNA synthetase, SAD||Aminoacyl-tRNA synthetase, class II (G/ H/ P/ S), conserved domain||TGS||Aminoacyl-tRNA synthetase, class II||Threonine-tRNA ligase, class IIa||Anticodon-binding
VIT_01s0026g00990	novel_141,vvi-miR394b	-	Thiamin diphosphate-binding fold||Dehydrogenase, E1 component||Pyruvate dehydrogenase (acetyl-transferring) E1 component, alpha subunit, subgroup y
VIT_01s0026g02230	vvi-miR2950-3p	-	Cullin repeat-like-containing domain||Winged helix-turn-helix DNA-binding domain||Cullin homology||Cullin protein, neddylation domain||Cullin, N-terminal
VIT_01s0026g02490	vvi-miR535a	-	Nucleoside phosphatase GDA1/CD39
VIT_01s0127g00150	vvi-miR399g	-	UbiE/COQ5 methyltransferase, conserved site||UbiE/COQ5 methyltransferase||S-adenosyl-L-methionine-dependent methyltransferase-like
VIT_01s0127g00210	vvi-miR845a	-	Homeodomain-like||Homeobox, conserved site||Homeobox KN domain||Homeodomain||KNOX1||KNOX2||ELK
VIT_01s0127g00520	vvi-miR398a	-	Thioredoxin-like fold||Thioredoxin, conserved site||C1-like
VIT_01s0127g00540	vvi-miR398a	-	C1-like||Thioredoxin-like fold
VIT_01s0127g00910	vvi-miR845d,vvi-miR845c	-	Myc-type, basic helix-loop-helix (bHLH) domain
VIT_01s0127g00920	vvi-miR3629a-3p	-	Small GTPase superfamily, ARF/SAR type||P-loop containing nucleoside triphosphate hydrolase
VIT_01s0137g00250	vvi-miR159c,novel_141,vvi-miR319e	-	GroEL-like equatorial domain||GroEL-like apical domain||Chaperone, tailless complex polypeptide 1||TCP-1-like chaperonin intermediate domain||Ribonuclease H-like domain||Chaperonin Cpn60/TCP-1||Chaperonin TCP-1, conserved site||GAG-pre-integrase domain
VIT_01s0137g00770	vvi-miR3629a-5p	-	Protein of unknown function DUF707
VIT_01s0137g00810	vvi-miR3629a-5p	-	Glycosyl transferase, family 17
VIT_01s0146g00490	vvi-miR396b	-	Tetratricopeptide-like helical||Pentatricopeptide repeat
VIT_01s0150g00070	vvi-miR394b	-	Pre-SET domain||Post-SET domain||Histone H3-K9 methyltransferase, plant||PUA-like domain||Pre-SET zinc-binding sub-group||SET domain||SRA-YDG
VIT_01s0150g00090	vvi-miR845c	-	RNA recognition motif 2||RNA recognition motif domain||Nucleotide-binding, alpha-beta plait
VIT_01s0150g00180	vvi-miR3631a-3p	-	Exostosin-like
VIT_01s0150g00630	vvi-miR319e,vvi-miR159c	-	Exostosin-like
VIT_01s0244g00160	vvi-miR156b,vvi-miR156e	-	P-loop containing nucleoside triphosphate hydrolase
VIT_02s0012g00090	vvi-miR477a	-	MORN motif
VIT_02s0012g00190	novel_141	-	Vacuolar protein sorting-associated protein 13 domain||Vacuolar protein sorting-associated protein 13||Peroxin/Dysferlin domain
VIT_02s0012g00270	vvi-miR396b,novel_141,vvi-miR394b,vvi-miR394a,vvi-miR396a	-	Vacuolar protein sorting-associated protein 13||Pleckstrin homology-like domain||Vacuolar protein sorting-associated protein 13A N-terminal domain||Pleckstrin homology domain
VIT_02s0012g01400	vvi-miR3629a-3p	-	Protein of unknown function DUF597
VIT_02s0012g01770	vvi-miR3629a-5p	-	Rad1/Rec1/Rad17
VIT_02s0012g02070	novel_141	-	Dolichol phosphate-mannose biosynthesis regulatory
VIT_02s0012g02240	vvi-miR399d,novel_141	-	Protein of unknown function DUF760
VIT_02s0012g02250	vvi-miR396a,vvi-miR396b	-	Basic-leucine zipper domain||G-box binding, MFMR
VIT_02s0012g02420	vvi-miR3631a-3p,vvi-miR3631b-3p	-	Pseudouridine synthase I, TruA, alpha/beta domain||Pseudouridine synthase I, TruA||Pseudouridine synthase I, TruA, N-terminal||Pseudouridine synthase, catalytic domain||Pseudouridine synthase I, TruA, C-terminal
VIT_02s0012g02520	vvi-miR156a	-	ESCRT-II complex, vps25 subunit||Winged helix-turn-helix DNA-binding domain||ESCRT-II complex, Vps25 subunit, N-terminal winged helix
VIT_02s0012g02660	vvi-miR399d	-	Proteasome component (PCI) domain
VIT_02s0012g02720	vvi-miR482	-	NB-ARC||Leucine rich repeat 4||P-loop containing nucleoside triphosphate hydrolase
VIT_02s0012g02760	vvi-miR160a	-	Methionyl-tRNA synthetase, Zn-domain||Methionyl/Leucyl tRNA synthetase
VIT_02s0012g02790	vvi-miR319e,novel_141,vvi-miR159c	-	SCAMP
VIT_02s0025g00120	vvi-miR395a	-	CCT domain
VIT_02s0025g00280	vvi-miR396b,vvi-miR3629a-5p	-	Ribosomal protein S5 domain 2-type fold||Histidine kinase-like ATPase, ATP-binding domain||Heat shock protein Hsp90, conserved site||Heat shock protein Hsp90||Heat shock protein Hsp90, N-terminal
VIT_02s0025g00640	vvi-miR3629a-3p	-	Reticulon
VIT_02s0025g00930	vvi-miR3633a-5p	-	AAA+ ATPase domain||ABC transporter, conserved site||ABC transporter, transmembrane domain, type 1||ABC transporter-like||P-loop containing nucleoside triphosphate hydrolase
VIT_02s0025g00950	vvi-miR3633a-5p	-	AAA+ ATPase domain||ABC transporter, transmembrane domain, type 1||ABC transporter, conserved site||ABC transporter-like||P-loop containing nucleoside triphosphate hydrolase
VIT_02s0025g00980	vvi-miR3633a-5p	-	ABC transporter, conserved site||ABC transporter, transmembrane domain, type 1||ABC transporter-like||P-loop containing nucleoside triphosphate hydrolase||AAA+ ATPase domain
VIT_02s0025g00990	vvi-miR3633a-5p	-	P-loop containing nucleoside triphosphate hydrolase||ABC transporter, conserved site||ABC transporter, transmembrane domain, type 1||ABC transporter-like||AAA+ ATPase domain
VIT_02s0025g01160	vvi-miR156a	-	Tetratricopeptide repeat||Tetratricopeptide-like helical||Tetratricopeptide repeat-containing domain||RNA-processing protein, HAT helix
VIT_02s0025g01620	vvi-miR3629a-3p	-	Lipase, GDSL||SGNH hydrolase-type esterase domain
VIT_02s0025g01760	vvi-miR3629a-5p	-	Cellulose synthase
VIT_02s0025g01840	vvi-miR845d	-	Cellulose synthase
VIT_02s0025g02000	vvi-miR3629a-3p	-	Ribosomal protein S6||Translation elongation factor EF1B/ribosomal protein S6
VIT_02s0025g02070	vvi-miR3623-5p	-	Plant regulator RWP-RK||Phox/Bem1p
VIT_02s0025g02330	vvi-miR3639-3p	-	Zinc finger, HIT-type
VIT_02s0025g02340	vvi-miR395a	-	UAS||Thioredoxin-like fold||UBX||Ubiquitin-related domain
VIT_02s0025g02750	vvi-miR3631b-3p,vvi-miR3631a-3p	-	Zinc finger, PHD-type||Zinc finger, RING/FYVE/PHD-type||Zinc finger, PHD-type, conserved site||Zinc finger, FYVE/PHD-type
VIT_02s0025g02780	vvi-miR319e	-	Ribosomal protein L12 family
VIT_02s0025g03200	vvi-miR394b	-	S-adenosyl-L-methionine-dependent methyltransferase-like||Putative S-adenosyl-L-methionine-dependent methyltransferase
VIT_02s0025g03700	vvi-miR3629a-3p	-	Leucine-rich repeat-containing N-terminal, type 2||Protein kinase-like domain||Protein kinase, catalytic domain||Leucine-rich repeat, typical subtype||Leucine-rich repeat||Serine-threonine/tyrosine-protein kinase catalytic domain
VIT_02s0025g03760	vvi-miR3631a-3p	-	EEIG1/EHBP1 N-terminal domain
VIT_02s0025g04160	vvi-miR845d	-	Munc13 homology 1||Mammalian uncoordinated homology 13, domain 2||Protein of unknown function DUF810
VIT_02s0025g04210	vvi-miR3629a-5p	-	UDP-glucose 4-epimerase||NAD(P)-binding domain||NAD-dependent epimerase/dehydratase||UDP-glucose 4-epimerase C-terminal domain
VIT_02s0025g04500	vvi-miR159c,vvi-miR319e	-	Ran binding domain||Pleckstrin homology-like domain
VIT_02s0025g04760	vvi-miR396b	-	YTH domain
VIT_02s0025g05060	vvi-miR169a,vvi-miR169v,vvi-miR169e	-	Armadillo||Kinesin, motor region, conserved site||Kinesin, motor domain||Armadillo-type fold||Kinesin-like protein||P-loop containing nucleoside triphosphate hydrolase||Armadillo-like helical
VIT_02s0025g05090	vvi-miR169v,vvi-miR169a,vvi-miR169e	-	Kinesin, motor region, conserved site||Kinesin, motor domain||Kinesin-like protein||P-loop containing nucleoside triphosphate hydrolase||Armadillo-like helical||Armadillo-type fold
VIT_02s0033g00080	vvi-miR156f	-	Domain of unknown function DUF1336||Pleckstrin homology domain||START-like domain||START domain||Pleckstrin homology-like domain
VIT_02s0033g00120	vvi-miR845a,vvi-miR396a,vvi-miR396b	-	START domain||Pleckstrin homology-like domain||START-like domain||Pleckstrin homology domain||Domain of unknown function DUF1336
VIT_02s0033g00930	vvi-miR3629a-5p	-	Single-strand DNA-binding||Nucleic acid-binding, OB-fold||Primosome PriB/single-strand DNA-binding
VIT_02s0087g00030	vvi-miR156b	-	Glycoside hydrolase, family 31
VIT_02s0087g00100	vvi-miR156f	-	Ankyrin repeat-containing domain||Ankyrin repeat
VIT_02s0087g00170	vvi-miR156b	-	Protein kinase, catalytic domain||LRR receptor-like serine/threonine-protein kinase FEI1/2||Protein kinase-like domain||Leucine-rich repeat||Leucine-rich repeat-containing N-terminal, type 2||Protein kinase, ATP binding site||Serine/threonine-protein kinase, active site||Serine/threonine- / dual specificity protein kinase, catalytic domain
VIT_02s0087g00230	vvi-miR3631a-3p	-	Aspartic peptidase||Peptidase A1||Peptidase aspartic, active site
VIT_02s0087g00390	vvi-miR845c,vvi-miR159c,vvi-miR319e,vvi-miR156a	-	Endonuclease/exonuclease/phosphatase
VIT_02s0087g00400	vvi-miR3626-3p,vvi-miR3629a-5p	-	Alpha/Beta hydrolase fold||Pectinacetylesterase
VIT_02s0087g00430	vvi-miR3629a-5p	-	BZR1, transcriptional repressor
VIT_02s0087g00880	vvi-miR3639-3p	-	Drug/metabolite transporter||WAT1-related protein
VIT_02s0154g00070	novel_141	-	YABBY protein||High mobility group (HMG) box domain
VIT_02s0154g00400	vvi-miR171b,vvi-miR171a,vvi-miR171h,vvi-miR171e,vvi-miR171f	-	Transcription factor GRAS
VIT_02s0234g00120	vvi-miR3629a-5p	-	Proteasome component (PCI) domain
VIT_02s0241g00120	vvi-miR3629a-3p	-	Leucine-rich repeat-containing N-terminal, type 2||Protein kinase-like domain||Serine-threonine/tyrosine-protein kinase catalytic domain||Leucine-rich repeat||Concanavalin A-like lectin/glucanase, subgroup||Protein kinase, catalytic domain
VIT_03s0017g00620	vvi-miR3637-3p	-	Oxoglutarate/iron-dependent dioxygenase||Isopenicillin N synthase-like||Non-haem dioxygenase N-terminal domain||Isopenicillin N synthase
VIT_03s0017g00940	vvi-miR159a	-	Cytochrome b6-f complex Fe-S subunit||Rieske [2Fe-2S] iron-sulphur domain||Rieske iron-sulphur protein||Cytochrome b6-f complex iron-sulfur subunit||Rieske iron-sulphur protein, C-terminal
VIT_03s0017g01170	vvi-miR845c,vvi-miR845a,vvi-miR845d	-	Gag-polypeptide of LTR copia-type
VIT_03s0017g01470	vvi-miR845c,vvi-miR845d	-	CO dehydrogenase flavoprotein-like, FAD-binding, subdomain 2||FAD-binding, type 2, subdomain 1||FAD-binding, type 2||FAD linked oxidase, N-terminal
VIT_03s0017g01490	vvi-miR3624-5p	-	Berberine/berberine-like||CO dehydrogenase flavoprotein-like, FAD-binding, subdomain 2||FAD-binding, type 2, subdomain 1||FAD-binding, type 2||FAD linked oxidase, N-terminal
VIT_03s0017g01720	vvi-miR3633a-5p	-	Aminotransferase class-III||Pyridoxal phosphate-dependent transferase, major region, subdomain 1||Pyridoxal phosphate-dependent transferase||Pyridoxal phosphate-dependent transferase, major region, subdomain 2
VIT_03s0017g01800	vvi-miR159c,vvi-miR477a	-	Pentatricopeptide repeat||Tetratricopeptide-like helical
VIT_03s0017g02140	vvi-miR319b	-	UDP-glucuronosyl/UDP-glucosyltransferase
VIT_03s0017g02160	novel_141	-	Zinc finger, C2H2-like||Zinc finger, C2H2||Zinc finger, BED-type predicted
VIT_03s0038g00470	vvi-miR3629a-3p	-	Protease-associated domain, PA||Proteinase inhibitor I9||Peptidase S8/S53 domain||Peptidase S8, subtilisin-related||Peptidase S8, subtilisin, Ser-active site
VIT_03s0038g00570	vvi-miR3630-5p	-	Protein of unknown function DUF1640
VIT_03s0038g00680	vvi-miR845d,vvi-miR845c	-	Exostosin-like
VIT_03s0038g00850	vvi-miR396b,vvi-miR845c,vvi-miR396a,vvi-miR845d,vvi-miR845a	-	Domain of unknown function DUF4463||Domain of unknown function DUF221
VIT_03s0038g01150	vvi-miR159a	-	Auxin responsive SAUR protein
VIT_03s0038g01240	novel_141,vvi-miR845d	-	Ubiquinone biosynthesis hydroxylase, UbiH/UbiF/VisC/COQ6, conserved site||Ubiquinone biosynthesis hydroxylase, UbiH/UbiF/VisC/COQ6||Monooxygenase, FAD-binding||Ubiquinone biosynthesis monooxygenase, COQ6-type
VIT_03s0038g01350	vvi-miR3631a-3p,vvi-miR3631a-5p,vvi-miR3631b-3p	-	Class I glutamine amidotransferase-like||Glutamine amidotransferase type 1
VIT_03s0038g01540	vvi-miR3633a-3p	-	P-loop containing nucleoside triphosphate hydrolase||NB-ARC
VIT_03s0038g02020	vvi-miR3631b-3p	-	Amidase signature domain||Amidase
VIT_03s0038g02760	vvi-miR3629a-3p	-	ATPase, V1 complex, subunit B||V-type ATP synthase regulatory subunit B/beta||ATPase, F1/V1/A1 complex, alpha/beta subunit, nucleotide-binding domain||ATPase, alpha/beta subunit, nucleotide-binding domain, active site||P-loop containing nucleoside triphosphate hydrolase||ATPase, F1/V1/A1 complex, alpha/beta subunit, C-terminal||ATPase, alpha/beta subunit, N-terminal
VIT_03s0038g02840	novel_141	-	Protein translocase complex, SecE/Sec61-gamma subunit||Preprotein translocase subunit SecE
VIT_03s0038g02940	vvi-miR845d,vvi-miR845a	-	WD40/YVTN repeat-like-containing domain||WD40 repeat||WD40-repeat-containing domain
VIT_03s0038g02960	vvi-miR3629a-3p	-	Pentatricopeptide repeat||Smr protein/MutS2 C-terminal
VIT_03s0038g03030	vvi-miR3631b-3p,vvi-miR3631a-3p	-	Like-Sm (LSM) domain||Mechanosensitive ion channel MscS
VIT_03s0038g03990	novel_141	-	Nucleotide-sugar transporter||UDP-galactose transporter
VIT_03s0063g00100	vvi-miR828a	-	Protein of unknown function DUF869, plant
VIT_03s0063g00680	vvi-miR2950-5p	-	Peptidase M16C associated||Peptidase M16, C-terminal domain||Peptidase M16, N-terminal||Metalloenzyme, LuxS/M16 peptidase-like||Peptidase M16 domain
VIT_03s0063g00940	vvi-miR169o	-	Protein kinase, ATP binding site||Protein kinase-like domain||Serine/threonine-protein kinase, active site||Calcium-binding EF-hand||Serine/threonine- / dual specificity protein kinase, catalytic domain||Protein kinase, catalytic domain||EF-hand-like domain
VIT_03s0063g01460	vvi-miR3629a-3p	-	PetM of cytochrome b6/f complex subunit 7||DNA-binding pseudobarrel domain||B3 DNA binding domain
VIT_03s0063g01730	vvi-miR482,vvi-miR156f	-	Protein of unknown function DUF716, TMEM45
VIT_03s0063g02560	novel_141	-	Phenylalanyl-tRNA synthetase, class IIc, alpha subunit||Phenylalanyl-tRNA synthetase||Aminoacyl-tRNA synthetase, class II
VIT_03s0063g02660	vvi-miR159c	-	HhH-GPD domain||Helix-turn-helix, base-excision DNA repair, C-terminal||DNA glycosylase
VIT_03s0063g02680	vvi-miR156a	-	SANT domain||SANT/Myb domain||Homeodomain-like
VIT_03s0088g00280	vvi-miR3633a-5p	-	Alpha/beta knot methyltransferases||EVE domain||tRNA (guanine-N1-)-methyltransferase, N-terminal||Ribosomal RNA small subunit methyltransferase E||PUA-like domain
VIT_03s0088g00690	vvi-miR845d	-	Allergen V5/Tpx-1-related||Allergen V5/Tpx-1-related, conserved site||Ves allergen||CAP domain
VIT_03s0088g00900	vvi-miR845d,vvi-miR845c	-	CAP domain
VIT_03s0088g00950	novel_141	-	PC-Esterase||Protein trichome birefringence-like 13||Trichome birefringence-like family||PMR5 N-terminal domain
VIT_03s0088g00970	vvi-miR396a,vvi-miR396b	-	Glycosyl transferase, family 35
VIT_03s0088g01060	vvi-miR845c,vvi-miR845d	-	Pyridoxal phosphate-dependent transferase, major region, subdomain 1||Aminotransferase, class I/classII||Pyridoxal phosphate-dependent transferase, major region, subdomain 2||Diaminopimelate aminotransferase, DapL, plant/Chlamydia-type||Pyridoxal phosphate-dependent transferase
VIT_03s0088g01260	vvi-miR166a	-	Ankyrin repeat-containing domain||Zinc finger, DHHC-type, palmitoyltransferase||Ankyrin repeat
VIT_03s0091g00320	vvi-miR845d	-	K Homology domain, type 1||Ribosomal RNA assembly KRR1
VIT_03s0091g00360	vvi-miR828a	-	Protein of unknown function DUF760
VIT_03s0091g00530	vvi-miR3629a-5p	-	N-acetyltransferase ESCO, acetyl-transferase domain||N-acetyltransferase ESCO, zinc-finger
VIT_03s0091g00710	novel_141	-	WD40 repeat||WD40-repeat-containing domain||WD40/YVTN repeat-like-containing domain
VIT_03s0091g01110	vvi-miR3629a-3p	-	MATH||TRAF-like
VIT_03s0097g00660	vvi-miR159c	-	Rmd5||Zinc finger, RING/FYVE/PHD-type||CTLH/CRA C-terminal to LisH motif domain||Zinc finger, RING-type||CTLH, C-terminal LisH motif||LisH dimerisation motif||RING-type zinc-finger, LisH dimerisation motif||CRA domain
VIT_03s0097g00670	vvi-miR396a,vvi-miR396b,vvi-miR2950-5p	-	Exocyst complex component Sec6
VIT_03s0132g00230	novel_141	-	Aldehyde/histidinol dehydrogenase||Aldehyde dehydrogenase domain||Aldehyde dehydrogenase, C-terminal||Aldehyde dehydrogenase, N-terminal||Methylmalonate-semialdehyde dehydrogenase
VIT_03s0167g00070	vvi-miR477b-5p	-	Transcription factor, K-box
VIT_03s0180g00080	vvi-miR3630-3p	-	Putative cyclase
VIT_03s0180g00120	vvi-miR167c,vvi-miR167b,vvi-miR3629a-5p	-	Citrate transporter-like domain
VIT_03s0180g00280	vvi-miR3633b-5p	-	UDP-glucuronosyl/UDP-glucosyltransferase
VIT_04s0008g00270	vvi-miR845c,vvi-miR845d,vvi-miR845a	-	Translation elongation/initiation factor/Ribosomal, beta-barrel||START-like domain
VIT_04s0008g00310	vvi-miR3631b-3p	-	Protein kinase, catalytic domain||Protein kinase-like domain||Leucine-rich repeat, typical subtype||Leucine-rich repeat||Protein kinase, ATP binding site||Leucine-rich repeat-containing N-terminal, type 2||Serine/threonine- / dual specificity protein kinase, catalytic domain||Serine/threonine-protein kinase, active site
VIT_04s0008g00470	vvi-miR3629a-5p	-	Early nodulin 93 ENOD93 protein
VIT_04s0008g00710	vvi-miR3629a-3p	-	Protein of unknown function DUF1639
VIT_04s0008g00790	vvi-miR156f	-	Ribosomal L28e/Mak16||Ribosomal protein L28e
VIT_04s0008g00920	vvi-miR396b	-	Serine/threonine- / dual specificity protein kinase, catalytic domain||Serine/threonine-protein kinase, active site||Protein kinase-like domain||Protein kinase, ATP binding site||Leucine-rich repeat||Protein kinase, catalytic domain||Leucine-rich repeat, typical subtype
VIT_04s0008g00950	vvi-miR156f	-	EF-hand-like domain||Calcium-binding EF-hand||EF-Hand 1, calcium-binding site
VIT_04s0008g00960	vvi-miR3631a-5p	-	EF-hand-like domain||Calcium-binding EF-hand||EF-Hand 1, calcium-binding site
VIT_04s0008g01200	vvi-miR3629a-3p	-	Translation initiation factor SUI1||Density-regulated protein DRP1
VIT_04s0008g01220	vvi-miR156e	-	Protein kinase, catalytic domain||Serine-threonine/tyrosine-protein kinase catalytic domain||Leucine rich repeat 4||Leucine-rich repeat||Leucine-rich repeat-containing N-terminal, type 2||Protein kinase-like domain
VIT_04s0008g01450	novel_141	-	S-adenosyl-L-methionine-dependent methyltransferase-like||Mycolic acid cyclopropane synthase
VIT_04s0008g01670	vvi-miR3629a-5p	-	Zinc finger, PHD-finger||Zinc finger, FYVE/PHD-type||Zinc finger, PHD-type, conserved site||Zinc finger, RING/FYVE/PHD-type||Zinc finger, PHD-type||Protein of unknown function DUF3594
VIT_04s0008g01820	vvi-miR395a	-	Myb domain||SANT/Myb domain||Homeodomain-like
VIT_04s0008g01870	vvi-miR828a	-	Homeodomain-like||SANT/Myb domain||Myb domain
VIT_04s0008g02530	vvi-miR845c,vvi-miR845d	-	Protein kinase, catalytic domain||Serine-threonine/tyrosine-protein kinase catalytic domain||Protein kinase-like domain
VIT_04s0008g03190	vvi-miR2950-5p	-	F-box domain, cyclin-like||Galactose oxidase/kelch, beta-propeller||Quinonprotein alcohol dehydrogenase-like domain
VIT_04s0008g03580	vvi-miR3629a-3p	-	Proton-dependent oligopeptide transporter family||Major facilitator superfamily domain
VIT_04s0008g03610	vvi-miR845d	-	Nucleotide-diphospho-sugar transferases||Glycosyl transferase, family 43
VIT_04s0008g03720	vvi-miR3629a-3p	-	VHS subgroup||ENTH/VHS||VHS||GAT
VIT_04s0008g03730	vvi-miR3629a-5p,vvi-miR3629a-3p	-	Aminotransferase, class IV
VIT_04s0008g03770	vvi-miR845d	-	Pyridoxal phosphate-dependent transferase||Aminotransferase, class I/classII||Aminotransferases, class-I, pyridoxal-phosphate-binding site||Aspartate/other aminotransferase||Pyridoxal phosphate-dependent transferase, major region, subdomain 1
VIT_04s0008g04120	vvi-miR845d,vvi-miR845a,vvi-miR845c	-	BURP domain
VIT_04s0008g04230	vvi-miR3629a-5p	-	ABC transporter-like||ABC-2 type transporter||P-loop containing nucleoside triphosphate hydrolase||Plant PDR ABC transporter associated||AAA+ ATPase domain||ABC-transporter extracellular N-terminal domain
VIT_04s0008g04350	vvi-miR3629a-5p	-	Syntaxin, N-terminal||Target SNARE coiled-coil domain||t-SNARE||Syntaxin/epimorphin, conserved site
VIT_04s0008g04490	vvi-miR3629a-3p	-	Protein of unknown function DUF581
VIT_04s0008g04520	vvi-miR396a,vvi-miR396b,vvi-miR2950-5p	-	GAG-pre-integrase domain
VIT_04s0008g04720	vvi-miR3629a-3p	-	Endonuclease/exonuclease/phosphatase
VIT_04s0008g05030	vvi-miR3629a-3p	-	P-loop containing nucleoside triphosphate hydrolase||Ran GTPase||Small GTPase superfamily||Small GTPase superfamily, Rab type||Small GTPase superfamily, Ras type||Small GTP-binding protein domain||Small GTPase superfamily, Rho type
VIT_04s0008g05520	novel_141,vvi-miR3629a-3p	-	Coactivator CBP, KIX domain
VIT_04s0008g05550	vvi-miR156a	-	Leucine-rich repeat||Malectin
VIT_04s0008g05580	vvi-miR3629a-5p	-	Ubiquitin-related domain
VIT_04s0008g05830	vvi-miR3629a-3p	-	Armadillo||Armadillo-like helical||Armadillo-type fold
VIT_04s0008g05880	vvi-miR319e,vvi-miR159c	-	Zinc finger, PHD-type, conserved site||Zinc finger, PHD-type||P-loop containing nucleoside triphosphate hydrolase||Domain of unknown function DUF1086||Chromo domain-like||Chromo domain/shadow||Rubredoxin-like domain||Helicase, superfamily 1/2, ATP-binding domain||Domain of unknown function DUF1087||SNF2-related||Zinc finger, PHD-finger||Chromo domain||Homeodomain-like||Zinc finger, RING/FYVE/PHD-…
VIT_04s0008g06180	vvi-miR156b,vvi-miR156e	-	SET domain||Zinc finger, FYVE/PHD-type||Zinc finger, PHD-finger||Zinc finger, PHD-type||Protein kinase C-like, phorbol ester/diacylglycerol binding||Post-SET domain||Zinc finger, RING/FYVE/PHD-type
VIT_04s0008g06190	vvi-miR319e,vvi-miR159c	-	Reverse transcriptase, RNA-dependent DNA polymerase
VIT_04s0008g06230	vvi-miR156a	-	Ubiquitin subgroup||Ubiquitin||Ubiquitin-related domain
VIT_04s0008g06260	vvi-miR477b-5p	-	Exoribonuclease, phosphorolytic domain 1||PNPase/RNase PH domain||Exoribonuclease, phosphorolytic domain 2||Ribosomal protein S5 domain 2-type fold
VIT_04s0008g06280	vvi-miR159c,vvi-miR319e	-	EF-Hand 1, calcium-binding site||Calcium-binding EF-hand||EF-hand-like domain
VIT_04s0008g06480	vvi-miR3629a-3p,vvi-miR3629a-5p	-	Domain of unknown function DUF4094||Glycosyl transferase, family 31
VIT_04s0008g06610	vvi-miR172a,vvi-miR172c,vvi-miR172b	-	ClpP/crotonase-like domain||Crotonase superfamily
VIT_04s0008g06620	vvi-miR3629a-5p	-	Phospholipase D-like domain||Phospholipase D/Transphosphatidylase
VIT_04s0008g06710	vvi-miR845a,vvi-miR845d	-	Zinc finger, U1-type||Zinc finger, C2H2-like
VIT_04s0008g07000	vvi-miR3629a-5p,vvi-miR3631b-3p	-	G-patch domain||Zinc finger, CCCH-type
VIT_04s0008g07400	vvi-miR319e,vvi-miR159c,vvi-miR3629a-5p	-	NAD(P)-binding domain
VIT_04s0023g00050	vvi-miR319e,vvi-miR159c	-	UDP-glucuronosyl/UDP-glucosyltransferase||Glycosyl transferase, family 28
VIT_04s0023g00150	vvi-miR3626-3p,vvi-miR169x	-	Tetratricopeptide repeat-containing domain||Tetratricopeptide-like helical||Tetratricopeptide TPR2||Membrane insertase OXA1/ALB3/YidC||Tetratricopeptide repeat
VIT_04s0023g00430	vvi-miR3629a-3p	-	Protein-tyrosine phosphatase, active site||Protein-tyrosine phosphatase-like||Protein-tyrosine phosphatase, SIW14-like||Protein-tyrosine phosphatase, dual specificity phosphatase, eukaryotic
VIT_04s0023g00780	vvi-miR394b	-	PspA/IM30
VIT_04s0023g00830	vvi-miR3631a-3p,vvi-miR3631a-5p,vvi-miR3629a-5p	-	Calreticulin||Calreticulin/calnexin, conserved site||Calreticulin/calnexin||Concanavalin A-like lectin/glucanase, subgroup||Calreticulin/calnexin, P domain
VIT_04s0023g01380	vvi-miR171e,vvi-miR171f,vvi-miR171h,vvi-miR171b,vvi-miR171a	-	Transcription factor GRAS
VIT_04s0023g01400	vvi-miR159c	-	Protein phosphatase 2C (PP2C)-like
VIT_04s0023g01440	vvi-miR3629a-5p	-	DNA-directed RNA polymerase III subunit Rpc5
VIT_04s0023g01900	vvi-miR396a,vvi-miR396b	-	AAA+ ATPase domain||P-loop containing nucleoside triphosphate hydrolase||ATPase, AAA-type, conserved site||ATPase, AAA-type, core||ATPase family AAA domain-containing protein 3, domain of unknown function DUF3523
VIT_04s0023g01930	vvi-miR395a	-	Myc-type, basic helix-loop-helix (bHLH) domain||Basic helix-loop-helix (bHLH) transcription factors BEE-like, plant
VIT_04s0023g01960	vvi-miR397a	-	Laccase||Multicopper oxidase, copper-binding site||Multicopper oxidase, type 1||Multicopper oxidase, type 3||Cupredoxin||Multicopper oxidase, type 2
VIT_04s0023g02440	vvi-miR3629a-3p,vvi-miR394b,vvi-miR319e	-	Ubiquitin-conjugating enzyme E2C-binding protein
VIT_04s0023g03010	novel_141	-	Aldolase-type TIM barrel||Fructose-bisphosphate aldolase class-I active site||Fructose-bisphosphate aldolase class-I, eukaryotic-type||Fructose-bisphosphate aldolase, class-I
VIT_04s0023g03350	vvi-miR159c	-	Phosphatidylinositol 3-/4-kinase, catalytic domain||PIK-related kinase, FATC||Protein kinase-like domain||PIK-related kinase||PIK-related kinase, FAT||Armadillo-like helical||Armadillo-type fold
VIT_04s0023g03570	vvi-miR3625-3p	-	RNA (C5-cytosine) methyltransferase, subfamily 9||RNA (C5-cytosine) methyltransferase||S-adenosyl-L-methionine-dependent methyltransferase-like||Tetrapeptide transporter, OPT1/isp4||Oligopeptide transporter OPT superfamily||Bacterial Fmu (Sun)/eukaryotic nucleolar NOL1/Nop2p
VIT_04s0023g03620	vvi-miR396b	-	Proteasome subunit Rpn10||von Willebrand factor, type A||Ubiquitin interacting motif
VIT_04s0023g03650	vvi-miR319e,vvi-miR159c	-	Glycoside hydrolase, families 57/38, central domain||Glycoside hydrolase, family 38, central domain||Glycosyl hydrolase family 38, C-terminal||Galactose mutarotase-like domain||Glycoside hydrolase 38/57, N-terminal domain||Glycosyl hydrolase, family 13, all-beta||Glycoside hydrolase family 38, N-terminal domain||Glycoside hydrolase/deacetylase, beta/alpha-barrel
VIT_04s0023g03730	vvi-miR845c,vvi-miR845d,vvi-miR845a	-	Haem peroxidase, plant/fungal/bacterial||Haem peroxidase||Plant ascorbate peroxidase||Peroxidases heam-ligand binding site
VIT_04s0023g03810	vvi-miR3639-5p	-	SAM dependent carboxyl methyltransferase||S-adenosyl-L-methionine-dependent methyltransferase-like
VIT_04s0023g03820	vvi-miR3629a-5p	-	3-dehydroquinate synthase AroB||3-dehydroquinate synthase domain
VIT_04s0043g00130	vvi-miR319e,vvi-miR159c	-	Mob1/phocein
VIT_04s0043g00400	vvi-miR3629a-5p,vvi-miR159c,vvi-miR319e	-	Exosome complex component CSL4||Exosome complex component, N-terminal domain||Nucleic acid-binding, OB-fold
VIT_04s0043g00570	vvi-miR396b,vvi-miR396a	-	Armadillo-type fold||Armadillo-like helical||HEAT||HEAT, type 2||Proteasome component ECM29/Translational activator GCN1
VIT_04s0043g00600	vvi-miR3629a-5p	-	Armadillo-like helical||Armadillo-type fold||Domain of unknown function DUF3554||Proteasome component ECM29/Translational activator GCN1
VIT_04s0043g01030	vvi-miR3633b-3p	-	Protein kinase, catalytic domain||Concanavalin A-like lectin/glucanase, subgroup||Serine/threonine- / dual specificity protein kinase, catalytic domain||Serine/threonine-protein kinase, active site||Protein kinase-like domain||Protein kinase, ATP binding site
VIT_04s0044g00030	vvi-miR3629a-3p,vvi-miR3633a-5p	-	Synaptojanin, N-terminal||Phosphoinositide phosphatase SAC6/7/8
VIT_04s0044g00310	vvi-miR3629a-5p	-	Drug/metabolite transporter||WAT1-related protein
VIT_04s0044g00580	vvi-miR3629a-5p	-	Actin/actin-like conserved site||Actin, conserved site||Actin-related protein
VIT_04s0044g00710	vvi-miR482	-	UTP--glucose-1-phosphate uridylyltransferase, subgroup||Nucleotide-diphospho-sugar transferases||UTP--glucose-1-phosphate uridylyltransferase
VIT_04s0044g00740	vvi-miR3629a-5p	-	Protein of unknown function DUF167
VIT_04s0044g00890	vvi-miR3638-5p	-	Aspartate/glutamate/uridylate kinase||Uridylate kinase, bacteria||Uridylate kinase
VIT_04s0044g00920	novel_141	-	Ankyrin repeat||Ankyrin repeat-containing domain||Caskin/Ankyrin repeat-containing protein||Domain of unknown function DUF4219||PGG domain
VIT_04s0044g01000	vvi-miR3631a-3p	-	Pectin lyase fold/virulence factor||Pectinesterase inhibitor||Pectinesterase, catalytic||Pectin lyase fold
VIT_04s0044g01210	vvi-miR159c,vvi-miR319e	-	Armadillo-type fold||Phosphatidylinositol 3/4-kinase, conserved site||Phosphatidylinositol Kinase||Protein kinase-like domain||Phosphoinositide 3-kinase, accessory (PIK) domain||Phosphatidylinositol 4-kinase||Phosphatidylinositol 3-/4-kinase, catalytic domain
VIT_04s0044g01610	vvi-miR3629a-3p	-	Cytochrome P450||Cytochrome P450, conserved site||Cytochrome P450, E-class, group I
VIT_04s0044g01620	vvi-miR3629a-3p	-	von Willebrand factor, type A||Zinc finger, RING/FYVE/PHD-type||Zinc finger, RING-type||Copine
VIT_04s0069g00620	vvi-miR3631b-3p	-	Periplasmic binding protein-like I||Ionotropic glutamate receptor, plant||Ionotropic glutamate receptor||Extracellular ligand-binding receptor
VIT_04s0069g00760	vvi-miR394b	-	Peptidase C19, ubiquitin carboxyl-terminal hydrolase 2, conserved site||Ubiquitin carboxyl-terminal hydrolase-like domain||Peptidase C19, ubiquitin carboxyl-terminal hydrolase 2||Zinc finger, MYND-type
VIT_04s0069g00950	vvi-miR397a	-	Multicopper oxidase, type 1||Cupredoxin||Multicopper oxidase, type 2
VIT_04s0079g00200	vvi-miR167c	-	AUX/IAA protein||Phox/Bem1p||Auxin response factor||DNA-binding pseudobarrel domain||B3 DNA binding domain
VIT_04s0079g00440	vvi-miR156f	-	PC-Esterase
VIT_04s0079g00480	vvi-miR159a,vvi-miR3637-5p	-	Homeodomain-like||START-like domain||Homeodomain||START domain
VIT_04s0079g00520	vvi-miR3631a-3p,vvi-miR3631a-5p	-	Armadillo-like helical||Armadillo-type fold||Armadillo
VIT_04s0079g00790	vvi-miR3631a-3p	-	AMP-dependent synthetase/ligase||AMP-binding, conserved site||Domain of unknown function DUF4009
VIT_05s0020g00020	vvi-miR845c,vvi-miR845d,vvi-miR845a	-	Signal recognition particle, SRP19 subunit
VIT_05s0020g00050	vvi-miR3629a-5p	-	Nucleic acid-binding, OB-fold
VIT_05s0020g00170	vvi-miR845d	-	Domain of unknown function DUF814
VIT_05s0020g00410	vvi-miR2950-5p,vvi-miR3635-5p	-	Pleckstrin homology domain||Vacuolar protein sorting-associated protein 13A N-terminal domain||C2 calcium-dependent membrane targeting||Pleckstrin homology-like domain||Vacuolar protein sorting-associated protein 13 domain||Vacuolar protein sorting-associated protein 62||Vacuolar protein sorting-associated protein 13
VIT_05s0020g00570	vvi-miR845a,vvi-miR845d,vvi-miR845c	-	Signal recognition particle, SRP19 subunit
VIT_05s0020g01130	vvi-miR319e,vvi-miR159c	-	DNA/RNA helicase, DEAD/DEAH box type, N-terminal||RNA helicase, DEAD-box type, Q motif||P-loop containing nucleoside triphosphate hydrolase||Helicase, superfamily 1/2, ATP-binding domain||Helicase, C-terminal
VIT_05s0020g01320	vvi-miR395a	-	Cullin repeat-like-containing domain||Cullin, conserved site||Cullin, N-terminal||Cullin protein, neddylation domain||Winged helix-turn-helix DNA-binding domain||Cullin homology
VIT_05s0020g01340	vvi-miR159a	-	Cullin repeat-like-containing domain||Cullin, N-terminal
VIT_05s0020g01500	vvi-miR3629a-5p	-	Heat shock factor binding 1
VIT_05s0020g01540	vvi-miR3638-3p	-	S-adenosyl-L-methionine-dependent methyltransferase-like||Protein arginine N-methyltransferase
VIT_05s0020g01610	novel_141	-	Homeodomain-like||DIRP||SANT/Myb domain||SANT domain
VIT_05s0020g01850	vvi-miR3629a-3p	-	F-box domain, cyclin-like||Double-stranded RNA-binding domain||Double-stranded RNA-binding protein
VIT_05s0020g02110	vvi-miR156e	-	Peroxidases heam-ligand binding site||Plant peroxidase||Haem peroxidase||Haem peroxidase, plant/fungal/bacterial
VIT_05s0020g02220	vvi-miR2950-5p	-	Prolyl 4-hydroxylase, alpha subunit||Oxoglutarate/iron-dependent dioxygenase||Metridin-like ShK toxin
VIT_05s0020g02290	vvi-miR156b	-	Endonuclease/exonuclease/phosphatase
VIT_05s0020g02350	vvi-miR159c	-	SAC3/GANP/Nin1/mts3/eIF-3 p25
VIT_05s0020g02490	vvi-miR319e,vvi-miR159c,vvi-miR156a	-	Alpha/beta hydrolase fold-5||Alpha/Beta hydrolase fold
VIT_05s0020g02900	vvi-miR166a,vvi-miR3624-3p	-	Mitochondrial substrate/solute carrier||Mitochondrial carrier protein||Mitochondrial carrier domain
VIT_05s0020g04020	novel_141	-	Domain of unknown function DUF828||Pleckstrin-like, plant
VIT_05s0020g04060	novel_141	-	Tify||CO/COL/TOC1, conserved site
VIT_05s0020g04210	vvi-miR395a	-	Sulphate adenylyltransferase catalytic domain||ATP-sulfurylase PUA-like domain||Sulphate adenylyltransferase||PUA-like domain||Rossmann-like alpha/beta/alpha sandwich fold
VIT_05s0020g04270	novel_141	-	Cation-transporting P-type ATPase, N-terminal||Cation-transporting P-type ATPase, C-terminal||P-type ATPase, transmembrane domain||P-type ATPase, A domain||P-type ATPase, phosphorylation site||Cation-transporting P-type ATPase||HAD-like domain||P-type ATPase, cytoplasmic domain N||Calcium-transporting P-type ATPase, subfamily IIB
VIT_05s0020g04610	vvi-miR3631a-3p,vvi-miR3631a-5p,vvi-miR3631b-3p	-	Serine/threonine- / dual specificity protein kinase, catalytic domain||Serine/threonine-protein kinase, active site||Protein kinase-like domain||Peptidoglycan-binding lysin domain||Concanavalin A-like lectin/glucanase, subgroup||Protein kinase, catalytic domain
VIT_05s0020g04630	novel_141	-	Regulator of K+ conductance, C-terminal||NAD(P)-binding domain||CASTOR/POLLUX/SYM8 ion channels
VIT_05s0020g04760	vvi-miR396b	-	RNA polymerase Rpb7, N-terminal||Nucleic acid-binding, OB-fold
VIT_05s0020g04950	vvi-miR156b	-	HIT-like domain||Cwf19-like, C-terminal domain-1||Cwf19-like protein, C-terminal domain-2
VIT_05s0020g04980	vvi-miR156a	-	MATH||TRAF-like
VIT_05s0029g00060	vvi-miR845d,vvi-miR845a,vvi-miR845c	-	Myb domain||Myb domain, plants||SANT/Myb domain||MYB-CC type transcription factor, LHEQLE-containing domain||Homeodomain-like
VIT_05s0029g00260	vvi-miR156a	-	DNA repair protein Rad50, eukaryotes||P-loop containing nucleoside triphosphate hydrolase
VIT_05s0029g00290	novel_141,vvi-miR156b	-	DNA repair protein Rad50, eukaryotes
VIT_05s0029g01070	novel_141	-	Ribosome biogenesis protein BMS1/TSR1, C-terminal
VIT_05s0029g01090	vvi-miR156a	-	Glycosyl hydrolases family 31, conserved site||Glycosyl hydrolases family 31, active site||Galactose mutarotase-like domain||Glycoside hydrolase, family 31||Glycoside hydrolase, superfamily||Glycoside hydrolase family 31, N-terminal domain
VIT_05s0029g01200	vvi-miR3629a-3p	-	Rossmann-like alpha/beta/alpha sandwich fold||Methionine-tRNA ligase, type 1||Nucleic acid-binding, OB-fold||Methionyl/Leucyl tRNA synthetase||Aminoacyl-tRNA synthetase, class I, conserved site||Aminoacyl-tRNA synthetase, class 1a, anticodon-binding||Methionyl-tRNA synthetase, Zn-domain||Methionyl-tRNA synthetase||tRNA-binding domain
VIT_05s0029g01370	vvi-miR396b,vvi-miR396a	-	Ubiquitin-associated/translation elongation factor EF1B, N-terminal||Ubiquitin-associated/translation elongation factor EF1B, N-terminal, eukaryote||UBA-like||PUB domain||Zinc finger, C2H2||PUG domain
VIT_05s0029g01380	vvi-miR2950-5p	-	Reverse transcriptase zinc-binding domain
VIT_05s0049g00010	novel_141	-	Cellulose synthase||Nucleotide-diphospho-sugar transferases
VIT_05s0049g00850	vvi-miR394b	-	PUA-like domain
VIT_05s0049g01380	novel_141	-	MIF4-like, type 1/2/3||Armadillo-type fold||Initiation factor eIF-4 gamma, MA3||MIF4G-like, type 3
VIT_05s0049g01460	vvi-miR396b	-	Tetratricopeptide repeat||Tetratricopeptide-like helical||Tetratricopeptide repeat-containing domain||Tetratricopeptide TPR-1
VIT_05s0049g01620	vvi-miR171b	-	S-adenosyl-L-methionine-dependent methyltransferase-like||Mycolic acid cyclopropane synthase
VIT_05s0049g02320	vvi-miR845d	-	HAD-superfamily hydrolase, subfamily IA, variant 1||HAD-like domain
VIT_05s0049g02350	vvi-miR3629a-5p	-	HAD-like domain
VIT_05s0051g00050	vvi-miR396a,vvi-miR159c,vvi-miR396b	-	Dilute||Myosin head, motor domain||IQ motif, EF-hand binding site||Myosin, N-terminal, SH3-like||Dil domain||P-loop containing nucleoside triphosphate hydrolase
VIT_05s0051g00460	vvi-miR3625-3p	-	Leucine-rich repeat||Leucine-rich repeat, typical subtype||Serine/threonine- / dual specificity protein kinase, catalytic domain||Serine/threonine-protein kinase, active site||Leucine-rich repeat-containing N-terminal, type 2||Concanavalin A-like lectin/glucanase, subgroup||Protein kinase, catalytic domain||Protein kinase-like domain
VIT_05s0051g00590	vvi-miR3633a-5p	-	Pectin lyase fold||Pectin lyase fold/virulence factor||Pectate lyase/Amb allergen||AmbAllergen
VIT_05s0051g00910	vvi-miR3629a-3p	-	Beta-glucosidase, GBA2 type, N-terminal||Six-hairpin glycosidase||Six-hairpin glycosidase-like||Glucosylceramidase
VIT_05s0051g00930	vvi-miR535a,vvi-miR156a	-	DNA primase, large subunit, eukaryotic||DNA primase, large subunit, eukaryotic/archaeal
VIT_05s0062g00120	vvi-miR3629a-3p	-	Ribosomal protein S8e/ribosomal biogenesis NSA2||Ribosomal protein S8e, conserved site||Ribosomal protein S8e
VIT_05s0062g00130	vvi-miR3631a-5p	-	Zinc finger, Sec23/Sec24-type||ADF-H/Gelsolin-like domain||Sec23/Sec24, helical domain||Sec23/Sec24 beta-sandwich||Sec23/Sec24, trunk domain||von Willebrand factor, type A||Gelsolin domain
VIT_05s0062g00860	vvi-miR171b	-	DNA topoisomerase, type IA||DNA topoisomerase, type IA, central region, subdomain 1||DNA topoisomerase, type IA, domain 2||DNA topoisomerase, type IA, active site||DNA topoisomerase, type IA, core domain||DNA topoisomerase, type IA, DNA-binding||Toprim domain||DNA topoisomerase, type IA, central||DNA topoisomerase, type IA, central region, subdomain 2
VIT_05s0062g00900	vvi-miR3629a-3p	-	Immunoglobulin-like fold||Carbohydrate binding module family 20||Carbohydrate-binding-like fold
VIT_05s0077g00490	vvi-miR319b,vvi-miR319e,vvi-miR159c	-	Alpha/Beta hydrolase fold
VIT_05s0077g00580	vvi-miR3629a-5p	-	DnaJ domain||DnaJ domain, conserved site
VIT_05s0077g00620	vvi-miR3629a-5p	-	Cas1p 10 TM acyl transferase domain
VIT_05s0077g01230	vvi-miR845a	-	Small GTP-binding protein domain||P-loop containing nucleoside triphosphate hydrolase||Small GTPase superfamily, SAR1-type||Small GTPase superfamily, ARF type||Small GTPase superfamily, ARF/SAR type
VIT_05s0077g01510	vvi-miR156e,vvi-miR156b	-	Protein of unknown function DUF789
VIT_05s0077g01710	novel_141	-	WD40 repeat||WD40-repeat-containing domain||Small-subunit processome, Utp12||WD40/YVTN repeat-like-containing domain||Quinonprotein alcohol dehydrogenase-like-superfamily
VIT_05s0094g00080	vvi-miR156b,vvi-miR156e	-	Pentatricopeptide repeat
VIT_05s0094g00370	vvi-miR3629a-3p	-	Diphthamide synthesis, eukaryotic DPH1/archaeal DPH2||Diphthamide synthesis DHP2, eukaryotic
VIT_05s0094g00800	vvi-miR3629a-5p	-	G-protein beta WD-40 repeat||WD40-repeat-containing domain||WD40 repeat||WD40 repeat, conserved site||WD40/YVTN repeat-like-containing domain
VIT_05s0094g00870	vvi-miR162	-	Ribosomal protein L18/L5||Ribosomal protein L5 eukaryotic/L18 archaeal, C-terminal||Ribosomal protein L5 eukaryotic/L18 archaeal
VIT_05s0094g01300	vvi-miR3629a-5p	-	Glycoside hydrolase, family 28||Parallel beta-helix repeat||Pectin lyase fold/virulence factor||Pectin lyase fold
VIT_05s0094g01370	vvi-miR845c	-	Translation initiation factor 1A (eIF-1A)||Nucleic acid-binding, OB-fold||Transcription factor IIIC, subunit 5||RNA-binding domain, S1, IF1 type
VIT_05s0102g00400	vvi-miR3625-5p	-	FAR1 DNA binding domain||FHY3/FAR1 family
VIT_05s0102g00470	vvi-miR3629a-5p	-	FAR1 DNA binding domain||FHY3/FAR1 family
VIT_05s0102g00770	vvi-miR3629a-5p	-	Domain of unknown function DUF1336
VIT_05s0124g00010	vvi-miR482	-	Galactose oxidase/kelch, beta-propeller||F-box domain, cyclin-like||F-box associated interaction domain
VIT_05s0124g00200	vvi-miR394b	-	Lipase, class 3||Alpha/Beta hydrolase fold
VIT_05s0124g00250	vvi-miR396a,vvi-miR396b	-	FY-rich, N-terminal||Zinc finger, PHD-type, conserved site||Zinc finger, FYVE/PHD-type||Zinc finger, PHD-type||SET domain||Tudor domain||FY-rich, C-terminal||Zinc finger, PHD-finger||Zinc finger, RING/FYVE/PHD-type||Post-SET domain||PWWP
VIT_05s0136g00140	vvi-miR156f	-	Protein kinase, catalytic domain||UbiB domain||Protein kinase-like domain||Aminoglycoside phosphotransferase
VIT_05s0136g00380	vvi-miR3631a-3p	-	Putative S-adenosyl-L-methionine-dependent methyltransferase MidA
VIT_05s0165g00160	vvi-miR3631a-3p,vvi-miR3631b-3p	-	Ankyrin repeat||Ankyrin repeat-containing domain||Caskin/Ankyrin repeat-containing protein||PGG domain
VIT_06s0004g00080	vvi-miR396b	-	WD40/YVTN repeat-like-containing domain
VIT_06s0004g00190	vvi-miR845c,vvi-miR845d	-	Transketolase-like, pyrimidine-binding domain||Transketolase, C-terminal||Transketolase, C-terminal/Pyruvate-ferredoxin oxidoreductase, domain II||Thiamin diphosphate-binding fold
VIT_06s0004g00250	vvi-miR3637-5p	-	Pumilio RNA-binding repeat||Armadillo-like helical||Armadillo-type fold
VIT_06s0004g00310	vvi-miR845a	-	Leucine rich repeat 4||Leucine-rich repeat||Leucine-rich repeat, typical subtype||Leucine-rich repeat-containing N-terminal, type 2
VIT_06s0004g00860	vvi-miR2950-5p	-	Kelch repeat type 1||Galactose oxidase, beta-propeller||F-box domain, cyclin-like
VIT_06s0004g01190	vvi-miR845d,vvi-miR845a,vvi-miR845c	-	Haem peroxidase, plant/fungal/bacterial||Haem peroxidase||Peroxidases heam-ligand binding site||Plant peroxidase
VIT_06s0004g01400	vvi-miR845c,vvi-miR845d	-	Concanavalin A-like lectin/glucanase, subgroup||Protein kinase, catalytic domain||Protein kinase-like domain||Bulb-type lectin domain||Protein kinase, ATP binding site||Serine/threonine- / dual specificity protein kinase, catalytic domain||Serine/threonine-protein kinase, active site
VIT_06s0004g01410	vvi-miR399a	-	Protein kinase, ATP binding site||Bulb-type lectin domain||Protein kinase-like domain||Serine/threonine-protein kinase, active site||Serine/threonine- / dual specificity protein kinase, catalytic domain||Concanavalin A-like lectin/glucanase, subgroup||Protein kinase, catalytic domain
VIT_06s0004g01480	vvi-miR845c,vvi-miR845d,vvi-miR845a	-	Lipoxygenase||Lipoxygenase, plant||Lipase/lipooxygenase, PLAT/LH2||Lipoxygenase, iron binding site||Lipoxygenase, conserved site||Lipoxygenase, C-terminal||Lipoxygenase, domain 3||Lipoxygenase, LH2
VIT_06s0004g01520	vvi-miR3636-5p	-	Pentatricopeptide repeat||Tetratricopeptide-like helical
VIT_06s0004g01540	vvi-miR3629a-5p	-	Oxidoreductase, C-terminal||Oxidoreductase, N-terminal||NAD(P)-binding domain
VIT_06s0004g01890	vvi-miR169l,vvi-miR169x	-	Heavy metal-associated domain, copper ion-binding||P-type ATPase, cytoplasmic domain N||Heavy-metal-associated, conserved site||HAD-like domain||Cation-transporting P-type ATPase||Cation-transporting P-type ATPase, subfamily IB||P-type ATPase, phosphorylation site||P-type ATPase, A domain||Heavy metal-associated domain, HMA
VIT_06s0004g02080	vvi-miR3629a-5p	-	Rossmann-like alpha/beta/alpha sandwich fold||tRNA-specific 2-thiouridylase||Adenine nucleotide alpha hydrolase-like domains
VIT_06s0004g02180	vvi-miR394b	-	Pyridoxal phosphate-dependent transferase, major region, subdomain 2||Pyridoxal phosphate-dependent transferase||Pyridoxal phosphate-dependent transferase, major region, subdomain 1||Aminotransferase, class I/classII
VIT_06s0004g02190	vvi-miR3629a-5p	-	Armadillo-type fold||Armadillo-like helical||Armadillo
VIT_06s0004g02200	vvi-miR3629a-5p	-	Chaperonin-like RbcX
VIT_06s0004g02270	vvi-miR169f,vvi-miR169l,vvi-miR169e,vvi-miR169m,vvi-miR169v,vvi-miR169a,vvi-miR169d,vvi-miR169o	-	CCAAT-binding transcription factor, subunit B
VIT_06s0004g02380	vvi-miR396b	-	NAD(P)-binding domain||NAD-dependent epimerase/dehydratase
VIT_06s0004g02480	vvi-miR408	-	Ovarian tumour, otubain
VIT_06s0004g02490	vvi-miR156b	-	AAA+ ATPase domain||ABC transporter, conserved site||ABC transporter-like||P-loop containing nucleoside triphosphate hydrolase
VIT_06s0004g02970	vvi-miR3629a-5p	-	Zinc finger, RING/FYVE/PHD-type||Zinc finger, RING-type
VIT_06s0004g03040	novel_141	-	WD40/YVTN repeat-like-containing domain||WD40 repeat||WD40-repeat-containing domain
VIT_06s0004g03150	vvi-miR394b	-	Cytochrome B561-related
VIT_06s0004g03590	vvi-miR172d,vvi-miR172c,vvi-miR172b,vvi-miR172a	-	DNA-binding, integrase-type||AP2/ERF domain||AP2-like ethylene-responsive transcription factor
VIT_06s0004g03640	vvi-miR156a	-	NAD(P)-binding domain||GroES-like||Alcohol dehydrogenase superfamily, zinc-type||Alcohol dehydrogenase GroES-like||Polyketide synthase, enoylreductase||Alcohol dehydrogenase, C-terminal
VIT_06s0004g03760	vvi-miR397a	-	Multicopper oxidase, type 2||Laccase||Multicopper oxidase, copper-binding site||Multicopper oxidase, type 1||Multicopper oxidase, type 3||Cupredoxin
VIT_06s0004g03870	vvi-miR156a	-	CCT domain
VIT_06s0004g04030	vvi-miR3631a-3p	-	Heavy metal-associated domain, HMA
VIT_06s0004g04040	vvi-miR3629a-5p	-	P-loop containing nucleoside triphosphate hydrolase||Plant disease resistance response protein||Pentatricopeptide repeat||DNA recombination and repair protein Rad51, C-terminal||AAA+ ATPase domain||Tetratricopeptide-like helical||DNA recombination/repair protein RecA/RadB, ATP-binding domain
VIT_06s0004g04050	vvi-miR397a	-	Multicopper oxidase, type 3||Multicopper oxidase, type 1||Cupredoxin||Laccase||Multicopper oxidase, copper-binding site||Multicopper oxidase, type 2
VIT_06s0004g04070	vvi-miR477a	-	UAA transporter
VIT_06s0004g04430	vvi-miR399b,vvi-miR399a,vvi-miR399d	-	Ubiquitin-conjugating enzyme, active site||Ubiquitin-conjugating enzyme/RWD-like||Ubiquitin-conjugating enzyme, E2
VIT_06s0004g04820	vvi-miR477b-5p	-	Protein kinase, ATP binding site||Protein kinase-like domain||Protein kinase, catalytic domain||Concanavalin A-like lectin/glucanase, subgroup||Serine-threonine/tyrosine-protein kinase catalytic domain
VIT_06s0004g04960	vvi-miR845c,vvi-miR845d	-	Transcription factor GRAS
VIT_06s0004g05020	vvi-miR3629a-5p	-	HAD-like domain||Pyrimidine 5-nucleotidase||HAD-superfamily hydrolase, subfamily IA, variant 1
VIT_06s0004g05320	vvi-miR156a	-	Short-chain dehydrogenase/reductase, conserved site||Glucose/ribitol dehydrogenase||Short-chain dehydrogenase/reductase SDR||NAD(P)-binding domain
VIT_06s0004g05330	vvi-miR156a	-	NAD(P)-binding domain||Short-chain dehydrogenase/reductase SDR||Glucose/ribitol dehydrogenase||Short-chain dehydrogenase/reductase, conserved site
VIT_06s0004g05380	vvi-miR156a	-	Short-chain dehydrogenase/reductase SDR||Short-chain dehydrogenase/reductase, conserved site||Glucose/ribitol dehydrogenase||NAD(P)-binding domain
VIT_06s0004g05450	vvi-miR156a	-	Glucose/ribitol dehydrogenase||NAD(P)-binding domain
VIT_06s0004g05670	vvi-miR3631a-5p,vvi-miR3631a-3p,vvi-miR3631b-3p	-	Glutathione S-transferase, C-terminal||Thioredoxin-like fold||Glutathione S-transferase, C-terminal-like||Glutathione S-transferase, N-terminal
VIT_06s0004g06090	vvi-miR397a	-	Multicopper oxidase, type 3||Multicopper oxidase, type 1||Cupredoxin||Laccase||Multicopper oxidase, copper-binding site||Multicopper oxidase, type 2
VIT_06s0004g06540	vvi-miR3629a-3p	-	Di-trans-poly-cis-decaprenylcistransferase-like||Di-trans-poly-cis-decaprenylcistransferase-like, conserved site
VIT_06s0004g06620	vvi-miR3629a-3p	-	Zinc finger, RING/FYVE/PHD-type||Zinc finger, RING-type
VIT_06s0004g07080	vvi-miR845a	-	Rab3 GTPase-activating protein catalytic subunit
VIT_06s0004g07100	vvi-miR169v,vvi-miR169o	-	RNA-binding domain, S1||Translation initiation factor 2, alpha subunit||Translation initiation factor 2, alpha subunit, C-terminal||Translation initiation factor 2, alpha subunit, middle domain||Ribosomal protein S1, RNA-binding domain||Nucleic acid-binding, OB-fold
VIT_06s0004g07230	vvi-miR162	-	UDP-glucuronosyl/UDP-glucosyltransferase
VIT_06s0004g07420	vvi-miR3639-3p,vvi-miR408	-	Laccase||Multicopper oxidase, copper-binding site||Tetratricopeptide-like helical||Cupredoxin||Multicopper oxidase, type 2||Tetratricopeptide repeat||Multicopper oxidase, type 3||Multicopper oxidase, type 1||Tetratricopeptide repeat-containing domain||N-acetyltransferase B complex, non-catalytic subunit
VIT_06s0004g07520	vvi-miR3629a-3p,vvi-miR3629a-5p	-	Leucine-rich repeat, cysteine-containing subtype
VIT_06s0004g07530	novel_141	-	Nucleotide-binding, alpha-beta plait||U1 small nuclear ribonucleoprotein A/U2 small nuclear ribonucleoprotein B''||RNA recognition motif domain
VIT_06s0004g07570	vvi-miR156e	-	Zinc finger, RING/FYVE/PHD-type||Zinc finger, RING-H2-type||Armadillo-type fold||Armadillo-like helical||Zinc finger, RING-CH-type||Zinc finger, RING-type
VIT_06s0004g07990	vvi-miR845d,vvi-miR319e,vvi-miR845c,vvi-miR159c	-	Peptidase M16, zinc-binding site||Peptidase M16, C-terminal domain||Metalloenzyme, LuxS/M16 peptidase-like||Peptidase M16, N-terminal||Peptidase M16 domain
VIT_06s0004g08160	vvi-miR394b,novel_141	-	RNA helicase, ATP-dependent, DEAD-box, conserved site||Helicase, C-terminal||Helicase, superfamily 1/2, ATP-binding domain||DNA/RNA helicase, DEAD/DEAH box type, N-terminal||RNA helicase, DEAD-box type, Q motif||P-loop containing nucleoside triphosphate hydrolase
VIT_06s0004g08350	vvi-miR159c,vvi-miR319e	-	AAA+ ATPase domain||ABC transporter-like||ABC transporter, conserved site||GAG-pre-integrase domain||ABC transporter, transmembrane domain, type 1||Ribonuclease H-like domain||P-loop containing nucleoside triphosphate hydrolase
VIT_06s0009g00770	vvi-miR3629a-5p	-	Beta-grasp domain||2Fe-2S ferredoxin, iron-sulphur binding site||Aldehyde oxidase/xanthine dehydrogenase, a/b hammerhead||[2Fe-2S]-binding||2Fe-2S ferredoxin-type domain||Aldehyde oxidase/xanthine dehydrogenase, molybdopterin binding||CO dehydrogenase flavoprotein-like, FAD-binding, subdomain 2||Aldehyde oxidase/xanthine dehydrogenase||FAD-binding, type 2||CO dehydrogenase flavoprotein, C-termina…
VIT_06s0009g00960	vvi-miR156e,vvi-miR845d	-	Peptidase C19 domain||Ubiquitin carboxyl-terminal hydrolase-like domain||Peptidase C19, ubiquitin carboxyl-terminal hydrolase 2, conserved site||Peptidase C19, ubiquitin carboxyl-terminal hydrolase 2||TRAF-like||MATH||Ubiquitin carboxyl-terminal hydrolase, C-terminal
VIT_06s0009g01150	vvi-miR3638-5p	-	RNA-binding protein Lupus La||Protein of unknown function DM15||Winged helix-turn-helix DNA-binding domain
VIT_06s0009g01210	vvi-miR390	-	Leucine-rich repeat-containing N-terminal, type 2||Leucine-rich repeat||Leucine rich repeat 4
VIT_06s0009g01890	vvi-miR845d	-	Ribonuclease H-like domain||Exonuclease, RNase T/DNA polymerase III||Exonuclease
VIT_06s0009g02380	vvi-miR399e	-	Pseudouridine-5'-phosphate glycosidase
VIT_06s0009g02480	vvi-miR319g,vvi-miR159a	-	SANT/Myb domain||Myb domain||Homeodomain-like
VIT_06s0009g02510	vvi-miR396a,vvi-miR845c,vvi-miR396b,vvi-miR2950-5p,vvi-miR845a,vvi-miR845d	-	Proteasome stabiliser ECM29||Armadillo-type fold||Armadillo-like helical||Proteasome component ECM29/Translational activator GCN1
VIT_06s0009g02740	vvi-miR396b	-	Tetratricopeptide-like helical||Pentatricopeptide repeat
VIT_06s0009g03140	vvi-miR3633a-5p	-	Cytochrome P450||Cytochrome P450, E-class, group I
VIT_06s0009g03240	vvi-miR3623-5p	-	Pleckstrin homology domain||Rho GTPase-activating protein domain||Ternary complex factor MIP1, leucine-zipper||Pleckstrin homology-like domain||Rho GTPase activation protein
VIT_06s0009g03530	vvi-miR3629a-3p	-	Homeodomain-like||Homeodomain
VIT_06s0009g03630	vvi-miR395a	-	Cytochrome P450, conserved site||Cytochrome P450, E-class, group I||Cytochrome P450
VIT_06s0061g00080	vvi-miR3629a-5p	-	NAD(P)-binding domain||Saccharopine dehydrogenase / Homospermidine synthase
VIT_06s0061g00690	vvi-miR396b	-	Nucleic acid-binding, OB-fold||DNA ligase, ATP-dependent||DNA ligase, ATP-dependent, N-terminal||DNA ligase, ATP-dependent, conserved site||DNA ligase, ATP-dependent, C-terminal||DNA ligase, ATP-dependent, central
VIT_06s0061g00700	vvi-miR3629a-5p	-	Uncharacterised conserved protein UCP031043||Protein of unknown function DUF966
VIT_06s0061g00820	novel_141	-	Acyl-CoA N-acyltransferase
VIT_06s0061g01050	vvi-miR477b-5p	-	Serine/threonine-protein kinase, active site||Serine/threonine- / dual specificity protein kinase, catalytic domain||Protein kinase, ATP binding site||Protein kinase-like domain||Protein kinase, catalytic domain
VIT_06s0061g01170	vvi-miR396b	-	Armadillo-like helical||Coatomer/calthrin adaptor appendage, C-terminal subdomain||Clathrin adaptor, alpha-adaptin, appendage, Ig-like subdomain||Coatomer/clathrin adaptor appendage, Ig-like subdomain||Clathrin alpha-adaptin/coatomer adaptor, appendage, C-terminal subdomain||Clathrin/coatomer adaptor, adaptin-like, N-terminal||Armadillo-type fold||Adaptor protein complex AP-2, alpha subunit||Clat…
VIT_06s0061g01360	novel_141	-	Protein of unknown function DUF868, plant
VIT_06s0061g01610	vvi-miR2950-5p,vvi-miR396a,vvi-miR396b	-	DNA polymerase epsilon catalytic subunit||DNA-directed DNA polymerase, family B||Reverse transcriptase zinc-binding domain||DNA-directed DNA polymerase, family B, exonuclease domain||Ribonuclease H-like domain||DNA polymerase epsilon, catalytic subunit A, C-terminal||DNA-directed DNA polymerase, family B, multifunctional domain
VIT_06s0080g00060	vvi-miR3623-3p	-	Signal transduction histidine kinase, phosphotransfer (Hpt) domain
VIT_06s0080g00470	vvi-miR3629a-5p	-	RNA recognition motif domain, eukaryote||RNA recognition motif domain||Nucleotide-binding, alpha-beta plait
VIT_06s0080g00970	vvi-miR3629a-5p	-	No apical meristem (NAM) protein
VIT_06s0080g01120	vvi-miR3629a-5p,vvi-miR167b	-	Tubulin/FtsZ, GTPase domain
VIT_07s0005g00210	novel_141	-	Thiamin pyrophosphokinase, eukaryotic||Thiamin pyrophosphokinase, catalytic domain||Thiamin pyrophosphokinase||Thiamin pyrophosphokinase, vitamin B1-binding domain
VIT_07s0005g00740	vvi-miR156e	-	Glycoside hydrolase, family 9||Glycoside hydrolase, family 9, active site||Six-hairpin glycosidase-like||Six-hairpin glycosidase
VIT_07s0005g01160	vvi-miR3629a-5p	-	Plant specific eukaryotic initiation factor 4B
VIT_07s0005g01420	vvi-miR3629a-5p	-	WD40 repeat||WD40-repeat-containing domain||WD40/YVTN repeat-like-containing domain||WD40 repeat, conserved site||Bromodomain
VIT_07s0005g01730	vvi-miR3639-3p	-	Flowering time control protein FCA||Nucleotide-binding, alpha-beta plait||WW domain||Collagen triple helix repeat||RNA recognition motif domain
VIT_07s0005g01910	vvi-miR172a,vvi-miR172b,vvi-miR172c,vvi-miR172d	-	Homeodomain-like||SWR1-complex protein 4/DNA methyltransferase 1-associated protein 1||DNA methyltransferase 1-associated 1||SANT/Myb domain
VIT_07s0005g02360	vvi-miR482	-	Hepatocellular carcinoma-associated antigen 59
VIT_07s0005g02640	vvi-miR3634-5p	-	Pyridoxal phosphate-dependent transferase||Aminotransferase, class V/Cysteine desulfurase||Pyridoxal phosphate-dependent transferase, major region, subdomain 1
VIT_07s0005g02810	vvi-miR396a,vvi-miR396b,vvi-miR2950-5p	-	Protein-tyrosine phosphatase-like
VIT_07s0005g03380	vvi-miR169o,vvi-miR169r,vvi-miR169x,vvi-miR169m,vvi-miR169a,vvi-miR169l,vvi-miR169b,vvi-miR169e,vvi-miR169t,vvi-miR169f,vvi-miR169i	-	Membrane transporter, Tim44-related/Ribosomal protein L45
VIT_07s0005g03490	vvi-miR169b	-	GAT||VHS||VHS subgroup||ENTH/VHS
VIT_07s0005g03690	vvi-miR156e	-	Serine/threonine- / dual specificity protein kinase, catalytic domain||Serine/threonine-protein kinase, active site||Protein kinase-like domain||Protein kinase, ATP binding site||AGC-kinase, C-terminal||Protein kinase, C-terminal||Protein kinase, catalytic domain
VIT_07s0005g03860	vvi-miR396b	-	Mitochodrial transcription termination factor-related
VIT_07s0005g03870	vvi-miR396b	-	Mitochodrial transcription termination factor-related
VIT_07s0005g04370	vvi-miR3629a-3p	-	Cytochrome oxidase assembly protein 1
VIT_07s0005g04510	novel_141	-	uDENN domain||DENN domain
VIT_07s0005g04650	vvi-miR396b,vvi-miR396a	-	WD40 repeat||WD40-repeat-containing domain||LisH dimerisation motif||WD40/YVTN repeat-like-containing domain||CTLH, C-terminal LisH motif
VIT_07s0005g04670	vvi-miR3633a-5p,vvi-miR3632-3p,vvi-miR845c,vvi-miR845a,vvi-miR845d	-	ABC transporter-like||P-loop containing nucleoside triphosphate hydrolase
VIT_07s0005g04900	novel_141	-	Protein of unknown function DUF3493
VIT_07s0005g04950	vvi-miR159c	-	Tetraspanin/Peripherin
VIT_07s0005g05160	vvi-miR394b	-	AAA+ ATPase domain||ATPase, AAA-type, core||ATPase, AAA-type, conserved site||P-loop containing nucleoside triphosphate hydrolase||26S proteasome subunit P45
VIT_07s0005g05420	vvi-miR3630-3p	-	Leucine-rich repeat-containing N-terminal, type 2||Protein kinase, ATP binding site||Serine/threonine-protein kinase, active site||Serine/threonine- / dual specificity protein kinase, catalytic domain||Leucine-rich repeat, typical subtype||Leucine-rich repeat||Protein kinase-like domain||Protein kinase, catalytic domain||Serine-threonine/tyrosine-protein kinase catalytic domain
VIT_07s0005g05600	vvi-miR159c,vvi-miR319e	-	UDP-glucuronosyl/UDP-glucosyltransferase||Glycosyl transferase, family 28
VIT_07s0005g05620	vvi-miR162	-	Thioredoxin-like fold||mRNA splicing factor, thioredoxin-like U5 snRNP
VIT_07s0005g05720	vvi-miR845c,vvi-miR845d,vvi-miR845a	-	Tetratricopeptide repeat||Tetratricopeptide-like helical||Tetratricopeptide TPR-1
VIT_07s0005g05770	vvi-miR3640-5p	-	Tetratricopeptide repeat-containing domain||Tetratricopeptide-like helical||Tetratricopeptide repeat
VIT_07s0005g06640	vvi-miR3631a-3p,vvi-miR3631b-3p	-	CRAL-TRIO domain||CRAL/TRIO, N-terminal domain||Cellular retinaldehyde binding/alpha-tocopherol transport
VIT_07s0031g00600	vvi-miR394b,novel_141	-	Nucleotide-binding, alpha-beta plait||RNA recognition motif domain
VIT_07s0031g00840	vvi-miR3629a-5p,novel_141	-	CTLH/CRA C-terminal to LisH motif domain||CTLH, C-terminal LisH motif
VIT_07s0031g01230	vvi-miR3629a-3p	-	Ribosomal protein L30e, conserved site||50S ribosomal protein L30e-like||Ribosomal protein L30e||Ribosomal protein L7Ae/L30e/S12e/Gadd45
VIT_07s0031g01860	vvi-miR3629a-5p	-	Bi-functional UDP-rhamnose/UDP-galactose transporter||Domain of unknown function DUF250
VIT_07s0031g01910	vvi-miR3633a-5p	-	Protein of unknown function DUF3511
VIT_07s0031g01970	novel_141	-	Winged helix-turn-helix DNA-binding domain||Proteasome component (PCI) domain
VIT_07s0031g02090	novel_141,vvi-miR396b	-	Armadillo-type fold||Armadillo-like helical||Src homology-3 domain
VIT_07s0031g02270	vvi-miR3630-3p	-	General substrate transporter||Sugar/inositol transporter||Sugar transporter, conserved site||Major facilitator superfamily domain
VIT_07s0031g02350	vvi-miR3631a-3p,vvi-miR3631a-5p	-	DnaJ domain
VIT_07s0031g02500	vvi-miR396b,vvi-miR396a	-	Transcriptional coactivator p15||ssDNA-binding transcriptional regulator
VIT_07s0031g02640	vvi-miR3629a-5p	-	Zinc finger, RING/FYVE/PHD-type||Zinc finger, RING-CH-type
VIT_07s0031g02660	vvi-miR3631a-5p	-	Thioredoxin, conserved site||Thioredoxin domain||Protein disulphide isomerase||Thioredoxin-like fold
VIT_07s0031g02850	vvi-miR319e,vvi-miR159c	-	Regulator of chromosome condensation 1/beta-lactamase-inhibitor protein II||Regulator of chromosome condensation, RCC1
VIT_07s0031g03130	vvi-miR3638-3p	-	DDT domain, subgroup||WSTF/Acf1/Cbp146||WHIM2 domain||DDT domain superfamily||DDT domain
VIT_07s0095g00380	vvi-miR159a	-	PAN-2 domain
VIT_07s0095g00710	vvi-miR3629a-5p,vvi-miR3629a-3p	-	Bystin
VIT_07s0095g00730	vvi-miR3629a-3p	-	Sterile alpha motif, type 1||Sterile alpha motif/pointed domain||Sterile alpha motif domain
VIT_07s0095g00740	vvi-miR396a,vvi-miR396b	-	Phosphatidylinositol-glycan biosynthesis class S protein
VIT_07s0095g00750	novel_141	-	GDP-fucose protein O-fucosyltransferase||O-fucosyltransferase, plant
VIT_07s0104g00220	vvi-miR845a,vvi-miR845d	-	Phenazine biosynthesis PhzF protein
VIT_07s0104g00300	vvi-miR3629a-5p	-	Domain of unknown function DUF21||Cystathionine beta-synthase, core
VIT_07s0104g00810	vvi-miR477b-3p	-	Biotin/lipoate A/B protein ligase||Octanoyltransferase||Octanoyltransferase, conserved site
VIT_07s0104g00820	vvi-miR3629a-3p	-	Bystin
VIT_07s0104g00880	vvi-miR3629a-5p	-	Signal transduction histidine kinase, phosphotransfer (Hpt) domain
VIT_07s0104g00910	vvi-miR3629a-5p	-	Pentatricopeptide repeat
VIT_07s0104g00980	vvi-miR482	-	Histone core||Histone H2A||Histone-fold
VIT_07s0104g01230	vvi-miR159a	-	Phox/Bem1p||AUX/IAA protein||DNA-binding pseudobarrel domain||Auxin response factor||B3 DNA binding domain
VIT_07s0104g01320	vvi-miR393b	-	F-box domain, cyclin-like||Leucine-rich repeat, cysteine-containing subtype
VIT_07s0104g01480	vvi-miR156a	-	Six-hairpin glycosidase-like||Domain of unknown function DUF255||Thioredoxin-like fold||Spermatogenesis-associated protein 20||Six-hairpin glycosidase
VIT_07s0104g01500	vvi-miR399b,vvi-miR399a,vvi-miR399d	-	Mitochodrial transcription termination factor-related
VIT_07s0104g01570	vvi-miR3631a-3p,vvi-miR3631b-3p	-	Cation efflux protein||Cation efflux protein transmembrane domain||Cation efflux protein cytoplasmic domain
VIT_07s0104g01590	vvi-miR845a,vvi-miR845d	-	Cullin repeat-like-containing domain||Cullin homology||Winged helix-turn-helix DNA-binding domain||Cullin, N-terminal||Cullin protein, neddylation domain
VIT_07s0104g01810	vvi-miR156b	-	Glutathione S-transferase, C-terminal-like||Glutathione S-transferase, N-terminal||Thioredoxin-like fold||Glutathione S-transferase, C-terminal
VIT_07s0129g00280	vvi-miR396b	-	Protein of unknown function DUF2419
VIT_07s0129g00570	vvi-miR156a	-	WD40/YVTN repeat-like-containing domain||WD40 repeat||WD40-repeat-containing domain
VIT_07s0129g01000	vvi-miR156e	-	F-box domain, cyclin-like
VIT_07s0130g00370	vvi-miR172d	-	Smr protein/MutS2 C-terminal||Domain of unknown function DUF1771
VIT_07s0130g00510	vvi-miR482	-	Enhancer of polycomb-like, N-terminal||Enhancer of polycomb protein
VIT_07s0141g00220	vvi-miR3629a-5p	-	Myc-type, basic helix-loop-helix (bHLH) domain
VIT_07s0141g00740	vvi-miR3629a-5p	-	Calponin homology domain||EF-hand-like domain
VIT_07s0151g01030	vvi-miR159c,vvi-miR319e,vvi-miR164a	-	GNAT domain||Acyl-CoA N-acyltransferase
VIT_07s0191g00190	vvi-miR169d	-	DHBP synthase RibB-like alpha/beta domain||GTP cyclohydrolase II, RibA||3,4-dihydroxy-2-butanone 4-phosphate synthase, RibB||Riboflavin biosynthesis protein RibBA
VIT_07s0197g00010	vvi-miR156e	-	Ribosomal protein L25/Gln-tRNA synthetase, anti-codon-binding domain||Ribosomal protein L25, beta domain||Ribosomal protein L25/Gln-tRNA synthetase, beta-barrel domain
VIT_07s0197g00050	vvi-miR394b,vvi-miR394a	-	Misato Segment II, myosin-like||DML1/Misato, tubulin domain||Tubulin/FtsZ, GTPase domain||Beta tubulin, autoregulation binding site
VIT_07s0205g00120	vvi-miR396b	-	Major facilitator superfamily||Major facilitator superfamily domain
VIT_07s0255g00120	vvi-miR393b	-	Vacuolar protein sorting-associated protein 13||Vacuolar protein sorting-associated protein 13 domain
VIT_07s0289g00010	vvi-miR3631b-3p	-	Lipoxygenase||Lipoxygenase, domain 3||Lipoxygenase, plant||Lipoxygenase, C-terminal||Lipoxygenase, conserved site||Lipoxygenase, LH2||Lipase/lipooxygenase, PLAT/LH2
VIT_08s0007g00120	vvi-miR156e	-	Ubiquitin-conjugating enzyme, E2||Ubiquitin-conjugating enzyme/RWD-like||Ubiquitin-conjugating enzyme, active site
VIT_08s0007g00620	vvi-miR3633a-5p	-	Zinc finger, DHHC-type, palmitoyltransferase
VIT_08s0007g00670	vvi-miR397a	-	Multicopper oxidase, type 2||Laccase||Multicopper oxidase, copper-binding site||Multicopper oxidase, type 3||Multicopper oxidase, type 1||Cupredoxin
VIT_08s0007g00680	vvi-miR397a	-	Cupredoxin||Multicopper oxidase, type 3||Multicopper oxidase, type 1||Multicopper oxidase, copper-binding site||Laccase||Multicopper oxidase, type 2
VIT_08s0007g01510	vvi-miR156a	-	Sphingomyelin synthase-like domain
VIT_08s0007g01550	vvi-miR397a	-	Multicopper oxidase, type 2||Multicopper oxidase, copper-binding site||Laccase||Cupredoxin||Multicopper oxidase, type 3||Multicopper oxidase, type 1
VIT_08s0007g01580	vvi-miR3629a-5p	-	Domain of unknown function DUF59
VIT_08s0007g01790	novel_141	-	FG-GAP repeat
VIT_08s0007g01910	vvi-miR397a	-	Multicopper oxidase, type 2||Laccase||Multicopper oxidase, copper-binding site||Multicopper oxidase, type 3||Multicopper oxidase, type 1||Cupredoxin
VIT_08s0007g01980	vvi-miR3629a-5p	-	JAB1/Mov34/MPN/PAD-1||Rpn11/EIF3F C-terminal domain
VIT_08s0007g02240	vvi-miR845d	-	Calcium/proton exchanger||Calcium/proton exchanger CAX||Sodium/calcium exchanger membrane region
VIT_08s0007g02340	vvi-miR845c,vvi-miR845d	-	Exocyst complex protein Exo70||Cullin repeat-like-containing domain
VIT_08s0007g02480	vvi-miR156a	-	Cytokinin riboside 5'-monophosphate phosphoribohydrolase LOG||LOG family
VIT_08s0007g02840	vvi-miR399g,vvi-miR399d,vvi-miR399a,vvi-miR399b,vvi-miR399e	-	LETM1-like
VIT_08s0007g02900	vvi-miR3629a-3p	-	Cyclophilin-like domain||Cyclophilin-type peptidyl-prolyl cis-trans isomerase||Cyclophilin-type peptidyl-prolyl cis-trans isomerase, conserved site||Cyclophilin-like peptidyl-prolyl cis-trans isomerase domain
VIT_08s0007g03090	vvi-miR3629a-3p,vvi-miR3631a-3p	-	Kinesin, motor region, conserved site||Kinesin-like protein||P-loop containing nucleoside triphosphate hydrolase||Kinesin, motor domain
VIT_08s0007g03580	vvi-miR399d	-	Leucine-rich repeat, cysteine-containing subtype
VIT_08s0007g04090	vvi-miR845a,vvi-miR845d,vvi-miR845c	-	Cytochrome P450
VIT_08s0007g04350	vvi-miR156a	-	Protein kinase-like domain||Protein kinase, ATP binding site||Wall-associated receptor kinase galacturonan-binding domain||Serine/threonine- / dual specificity protein kinase, catalytic domain||Serine/threonine-protein kinase, active site||Concanavalin A-like lectin/glucanase, subgroup||Protein kinase, catalytic domain
VIT_08s0007g04400	vvi-miR3626-5p,vvi-miR156a	-	P-loop containing nucleoside triphosphate hydrolase||RNA helicase, DEAD-box type, Q motif||DNA/RNA helicase, DEAD/DEAH box type, N-terminal||Helicase, superfamily 1/2, ATP-binding domain||Helicase, C-terminal
VIT_08s0007g04430	vvi-miR156a	-	P-loop containing nucleoside triphosphate hydrolase||Helicase, C-terminal
VIT_08s0007g04630	novel_141	-	Armadillo-type fold||Armadillo-like helical||PWWP
VIT_08s0007g04980	vvi-miR156f	-	Rossmann-like alpha/beta/alpha sandwich fold||Molybdopterin binding domain||Phosphoadenosine phosphosulphate reductase
VIT_08s0007g05340	vvi-miR159c	-	Kinesin, motor region, conserved site||Kinesin, motor domain||Kinesin-like protein||P-loop containing nucleoside triphosphate hydrolase
VIT_08s0007g05700	vvi-miR845c,vvi-miR845d	-	CRAL-TRIO domain
VIT_08s0007g05750	vvi-miR3633a-5p	-	S-adenosyl-L-methionine-dependent methyltransferase-like||Putative S-adenosyl-L-methionine-dependent methyltransferase
VIT_08s0007g06270	vvi-miR156a,vvi-miR156f,vvi-miR156e,vvi-miR156b	-	Transcription factor, SBP-box
VIT_08s0007g06460	vvi-miR397a	-	Multicopper oxidase, type 2||Multicopper oxidase, type 1||Multicopper oxidase, type 3||Cupredoxin||Laccase||Multicopper oxidase, copper-binding site
VIT_08s0007g06530	vvi-miR3629a-5p	-	DnaJ domain
VIT_08s0007g06950	vvi-miR845c,vvi-miR845a,vvi-miR845d	-	Plant disease resistance response protein
VIT_08s0007g07850	vvi-miR156b	-	Mur ligase, C-terminal||NAD(P)-binding domain||UDP-N-acetylmuramoylalanine-D-glutamate ligase||Mur ligase, central||Folylpolyglutamate synthetase, conserved site
VIT_08s0007g08180	vvi-miR3629a-3p	-	Armadillo-type fold||Armadillo-like helical
VIT_08s0007g08250	vvi-miR169e,vvi-miR169l,vvi-miR3629a-3p,vvi-miR169f,vvi-miR169a,vvi-miR169v,vvi-miR169m,vvi-miR169d,vvi-miR169x	-	CCAAT-binding factor, conserved site||CCAAT-binding transcription factor, subunit B
VIT_08s0007g08290	vvi-miR159c,vvi-miR319e	-	Translation elongation factor EFTu/EF1A, domain 2||P-loop containing nucleoside triphosphate hydrolase||Translation elongation/initiation factor/Ribosomal, beta-barrel||GTP-binding protein TypA||Tr-type G domain, conserved site||Elongation factor G, III-V domain||Small GTP-binding protein domain||Elongation factor, GTP-binding domain||Translation elongation factor EFG, V domain
VIT_08s0007g08480	vvi-miR845d,vvi-miR159c	-	Peptidase M16, zinc-binding site||Peptidase M16, C-terminal domain||Peptidase M16, N-terminal||Metalloenzyme, LuxS/M16 peptidase-like||Peptidase M16 domain
VIT_08s0032g00050	vvi-miR845d	-	AMP-binding, conserved site||AMP-dependent synthetase/ligase
VIT_08s0032g00470	vvi-miR3629a-3p	-	Glycoside hydrolase, superfamily||Glycoside hydrolase family 3 C-terminal domain||Glycoside hydrolase family 3||Glycoside hydrolase, family 3, N-terminal
VIT_08s0032g00590	vvi-miR3629a-5p	-	Universal stress protein A||UspA||Rossmann-like alpha/beta/alpha sandwich fold
VIT_08s0032g00690	vvi-miR3629a-3p,vvi-miR394b,vvi-miR171f	-	FAD-binding, type 2||FAD-binding, type 2, subdomain 1||FAD linked oxidase, N-terminal||FAD-linked oxidase-like, C-terminal||Vanillyl-alcohol oxidase, C-terminal subdomain 2||FAD-linked oxidase, C-terminal||CO dehydrogenase flavoprotein-like, FAD-binding, subdomain 2
VIT_08s0032g00740	vvi-miR396b	-	Pentatricopeptide repeat
VIT_08s0032g00960	vvi-miR3629a-5p	-	Co-chaperone Hsc20||DnaJ domain||Co-chaperone HscB, C-terminal oligomerisation domain
VIT_08s0032g01140	vvi-miR159c,vvi-miR396b,vvi-miR319e,vvi-miR396a	-	TRAPP II complex, Trs120||Tetratricopeptide-like helical||TRAPP III complex, Trs85
VIT_08s0032g01230	vvi-miR396a,vvi-miR396b,novel_141,vvi-miR2950-5p,vvi-miR3639-3p	-	Helicase-associated domain||Helicase, superfamily 1/2, ATP-binding domain||DNA/RNA helicase, ATP-dependent, DEAH-box type, conserved site||Helicase, C-terminal||DNA/RNA helicase, DEAD/DEAH box type, N-terminal||P-loop containing nucleoside triphosphate hydrolase||Domain of unknown function DUF1605
VIT_08s0040g00070	vvi-miR394b	-	Stem cell self-renewal protein Piwi||Domain of unknown function DUF1785||Ribonuclease H-like domain||Argonaute/Dicer protein, PAZ
VIT_08s0040g00230	vvi-miR3633a-5p	-	Armadillo-type fold
VIT_08s0040g00790	vvi-miR3629a-3p	-	Peptidyl-prolyl cis-trans isomerase, FKBP-type||Tetratricopeptide repeat-containing domain||Peptidyl-prolyl cis-trans isomerase, FKBP-type, domain||Elongated TPR repeat-containing domain||Tetratricopeptide repeat||Tetratricopeptide-like helical
VIT_08s0040g00850	vvi-miR159c	-	Photosystem II PsbP, oxygen evolving complex||Mog1/PsbP, alpha/beta/alpha sandwich
VIT_08s0040g00990	vvi-miR3630-3p	-	Transcription elongation factor, TFIIS/CRSP70, N-terminal, sub-type||Transcription factor IIS, N-terminal
VIT_08s0040g01780	novel_141	-	Cytokinin riboside 5'-monophosphate phosphoribohydrolase LOG||LOG family
VIT_08s0040g01790	vvi-miR156a,vvi-miR397a	-	Multicopper oxidase, type 2||Cupredoxin||Multicopper oxidase, type 1||Multicopper oxidase, type 3||Multicopper oxidase, copper-binding site||Laccase
VIT_08s0040g01810	vvi-miR160a,vvi-miR160c	-	AUX/IAA protein||Phox/Bem1p||DNA-binding pseudobarrel domain||Auxin response factor||B3 DNA binding domain
VIT_08s0040g02670	novel_141	-	Tetratricopeptide repeat-containing domain||Tetratricopeptide repeat||Tetratricopeptide-like helical
VIT_08s0040g02750	vvi-miR3629a-3p	-	PGG domain||Caskin/Ankyrin repeat-containing protein||Ankyrin repeat-containing domain||Ankyrin repeat
VIT_08s0040g02930	vvi-miR3629a-3p	-	Nuclear factor related to kappa-B-binding protein
VIT_08s0040g03180	vvi-miR172a,vvi-miR172b,vvi-miR172c,vvi-miR172d	-	AP2-like ethylene-responsive transcription factor||DNA-binding, integrase-type||AP2/ERF domain
VIT_08s0040g03330	vvi-miR3629a-3p	-	Nucleotide-binding, alpha-beta plait||RNA recognition motif domain
VIT_08s0056g00040	novel_141,vvi-miR159c,vvi-miR319e,vvi-miR156a	-	WD40 repeat||WD40-repeat-containing domain||Reverse transcriptase, RNA-dependent DNA polymerase||WD40/YVTN repeat-like-containing domain||WD40 repeat, conserved site
VIT_08s0056g00110	vvi-miR3633a-5p	-	GOLD
VIT_08s0056g00440	vvi-miR845d	-	Zinc finger, RING-type||Zinc finger, RING-type, conserved site||Zinc finger, RING/FYVE/PHD-type
VIT_08s0056g00550	vvi-miR3629a-3p	-	Zinc/iron permease
VIT_08s0056g00660	vvi-miR156a	-	Tetratricopeptide-like helical||Pentatricopeptide repeat
VIT_08s0056g00700	vvi-miR3629a-5p	-	RNA-binding protein Lupus La||Winged helix-turn-helix DNA-binding domain||Protein of unknown function DM15
VIT_08s0056g00730	vvi-miR3637-3p	-	Cellular retinaldehyde binding/alpha-tocopherol transport||CRAL-TRIO domain||CRAL/TRIO, N-terminal domain
VIT_08s0056g00770	vvi-miR159c,vvi-miR319e	-	RNA polymerase II-binding domain||ENTH/VHS||CID domain
VIT_08s0056g01070	vvi-miR845a	-	Multi antimicrobial extrusion protein
VIT_08s0056g01110	vvi-miR396b,vvi-miR396a,vvi-miR3629a-5p	-	P-loop containing nucleoside triphosphate hydrolase||CWF11 family
VIT_08s0056g01120	vvi-miR159a,vvi-miR3629a-3p	-	Multi antimicrobial extrusion protein
VIT_08s0056g01680	vvi-miR3640-3p	-	Lipoxygenase, LH2||Lipase/lipooxygenase, PLAT/LH2
VIT_08s0058g00070	vvi-miR845c,vvi-miR845d,vvi-miR845a	-	Leucine-rich repeat
VIT_08s0058g00620	novel_141	-	Kelch-type beta propeller||Galactose oxidase, beta-propeller||Kelch repeat type 1||Development/cell death domain
VIT_08s0058g00810	vvi-miR159c,vvi-miR319e	-	Integrase, catalytic core||ATP-grasp fold, subdomain 2||ATP-grasp fold, subdomain 1||ATP-grasp fold||D-alanine--D-alanine ligase, C-terminal||Reverse transcriptase, RNA-dependent DNA polymerase||D-alanine--D-alanine ligase, N-terminal||Ribonuclease H-like domain||D-alanine--D-alanine ligase/VANA/B/C, conserved site||D-alanine--D-alanine ligase||Pre-ATP-grasp domain
VIT_08s0058g00970	vvi-miR169r	-	Haem peroxidase, plant/fungal/bacterial||Peroxidase, active site||Haem peroxidase||Peroxidases heam-ligand binding site||Plant peroxidase
VIT_08s0058g01250	vvi-miR156b	-	Aminotransferase-like, plant mobile domain
VIT_08s0058g01430	vvi-miR3631a-3p	-	PRC-barrel-like
VIT_08s0058g01440	novel_141	-	Protein kinase, catalytic domain||Protein kinase, C-terminal||AGC-kinase, C-terminal||Protein kinase, ATP binding site||Protein kinase-like domain||Serine/threonine-protein kinase, active site||Serine/threonine- / dual specificity protein kinase, catalytic domain
VIT_08s0217g00040	vvi-miR397a	-	Armadillo-like helical||Armadillo-type fold
VIT_09s0002g00320	vvi-miR393b	-	Pectin lyase fold/virulence factor||Pectin lyase fold||Pectinesterase, catalytic||Pectinesterase inhibitor||Pectinesterase, active site
VIT_09s0002g01380	vvi-miR828a	-	Homeodomain-like||Myb domain||SANT/Myb domain
VIT_09s0002g01390	novel_141	-	Ubiquitin-like protein Atg12||Ubiquitin-related domain
VIT_09s0002g01530	vvi-miR3629a-5p	-	Protein of unknown function DUF1296||UBA-like
VIT_09s0002g01540	vvi-miR3629a-3p	-	Brevis radix-like domain||Transcription factor BREVIS RADIX, N-terminal domain
VIT_09s0002g01560	novel_141	-	SM domain found in ataxin-2||LsmAD domain
VIT_09s0002g01590	vvi-miR169a,vvi-miR169m,vvi-miR169x,vvi-miR169f,vvi-miR169o,vvi-miR169l,vvi-miR169e	-	CCAAT-binding transcription factor, subunit B
VIT_09s0002g01600	vvi-miR2950-5p	-	Protein of unknown function DUF3594||Zinc finger, PHD-type||Zinc finger, RING/FYVE/PHD-type||Zinc finger, FYVE/PHD-type||Zinc finger, PHD-type, conserved site||Zinc finger, PHD-finger
VIT_09s0002g01610	vvi-miR156a	-	AAA+ ATPase domain||Mitochondrial carrier domain||ATPase, dynein-related, AAA domain||P-loop containing nucleoside triphosphate hydrolase||Sigma-54 interaction domain, ATP-binding site 1||von Willebrand factor, type A||Mitochondrial substrate/solute carrier
VIT_09s0002g01800	vvi-miR159c	-	Single hybrid motif||Chloramphenicol acetyltransferase-like domain||2-oxo acid dehydrogenase, lipoyl-binding site||E3 binding||Biotin/lipoyl attachment||2-oxoacid dehydrogenase acyltransferase, catalytic domain||Dihydrolipoyllysine-residue acetyltransferase component of pyruvate dehydrogenase complex
VIT_09s0002g01860	vvi-miR3629a-5p	-	RNA polymerase I associated factor, A49-like
VIT_09s0002g02100	vvi-miR3633a-5p	-	Helicase, C-terminal||Helicase, superfamily 1/2, ATP-binding domain||RNA helicase, ATP-dependent, DEAD-box, conserved site||RNA helicase, DEAD-box type, Q motif||P-loop containing nucleoside triphosphate hydrolase||DNA/RNA helicase, DEAD/DEAH box type, N-terminal
VIT_09s0002g02110	vvi-miR845a	-	Mini-ribonuclease 3 family||Ribonuclease III domain
VIT_09s0002g02360	vvi-miR3629a-5p	-	SMAD/FHA domain
VIT_09s0002g02500	vvi-miR394b	-	Ubiquitin-related domain||Ubiquitin conserved site||Peptidase C19, ubiquitin carboxyl-terminal hydrolase 2, conserved site||Ubiquitin carboxyl-terminal hydrolase-like domain||Peptidase C19, ubiquitin carboxyl-terminal hydrolase 2||Ubiquitin
VIT_09s0002g02540	vvi-miR535a	-	RWD domain||Ubiquitin-conjugating enzyme/RWD-like
VIT_09s0002g02550	vvi-miR2111-3p,novel_141	-	PWWP
VIT_09s0002g02670	vvi-miR477b-3p	-	RNA methyltransferase TrmA, conserved site||23S rRNA (uracil(1939)-C(5))-methyltransferase RlmD||Nucleic acid-binding, OB-fold||S-adenosyl-L-methionine-dependent methyltransferase-like||TRAM domain||(Uracil-5)-methyltransferase
VIT_09s0002g02770	vvi-miR159c	-	Malectin-like carbohydrate-binding domain||Protein kinase, catalytic domain||Concanavalin A-like lectin/glucanase, subgroup||Serine/threonine- / dual specificity protein kinase, catalytic domain||Serine/threonine-protein kinase, active site||Protein kinase-like domain||Protein kinase, ATP binding site
VIT_09s0002g03460	vvi-miR477b-3p	-	Taurine catabolism dioxygenase TauD/TfdA
VIT_09s0002g03740	vvi-miR3629a-5p	-	START domain||Homeodomain||MEKHLA||START-like domain||Homeodomain-like
VIT_09s0002g04670	vvi-miR159c,vvi-miR319e	-	Helicase-like, DEXD box c2 type||ATP-dependent helicase, C-terminal||DEAD2||Helicase, superfamily 1/2, ATP-binding domain, DinG/Rad3-type||P-loop containing nucleoside triphosphate hydrolase||DNA helicase (DNA repair), Rad3 type
VIT_09s0002g04860	vvi-miR3629a-5p	-	Arf GTPase activating protein
VIT_09s0002g05170	vvi-miR156e	-	Nucleotide-diphospho-sugar transferases
VIT_09s0002g05340	vvi-miR156b	-	Isopenicillin N synthase-like||Oxoglutarate/iron-dependent dioxygenase||Non-haem dioxygenase N-terminal domain
VIT_09s0002g05370	vvi-miR3629a-3p	-	AAA+ ATPase domain||ABC-transporter extracellular N-terminal domain||ABC-2 type transporter||P-loop containing nucleoside triphosphate hydrolase||Plant PDR ABC transporter associated||ABC transporter-like
VIT_09s0002g05400	vvi-miR3629a-3p	-	P-loop containing nucleoside triphosphate hydrolase||ABC-2 type transporter||Plant PDR ABC transporter associated||ABC transporter-like||AAA+ ATPase domain||ABC-transporter extracellular N-terminal domain
VIT_09s0002g05490	vvi-miR3629a-3p	-	AAA+ ATPase domain||ABC-transporter extracellular N-terminal domain||ABC transporter-like||ABC-2 type transporter||P-loop containing nucleoside triphosphate hydrolase||Plant PDR ABC transporter associated
VIT_09s0002g05550	vvi-miR482	-	ABC-2 type transporter||P-loop containing nucleoside triphosphate hydrolase
VIT_09s0002g05560	vvi-miR3629a-3p	-	ABC transporter-like||Plant PDR ABC transporter associated||P-loop containing nucleoside triphosphate hydrolase||ABC-2 type transporter||ABC-transporter extracellular N-terminal domain||AAA+ ATPase domain
VIT_09s0002g05740	vvi-miR3629a-5p	-	Epoxide hydrolase-like||Alpha/Beta hydrolase fold||Alpha/beta hydrolase fold-1
VIT_09s0002g06090	vvi-miR3629a-3p	-	JAB1/Mov34/MPN/PAD-1
VIT_09s0002g06380	vvi-miR3639-5p	-	Glycoside hydrolase, family 28||Pectin lyase fold||Pectin lyase fold/virulence factor
VIT_09s0002g06780	vvi-miR3629a-5p	-	Domain of unknown function DUF4050
VIT_09s0002g07110	vvi-miR3629a-5p	-	DOG1 domain||Protein kinase-like domain||Protein kinase, ATP binding site||Protein kinase, catalytic domain
VIT_09s0002g07510	vvi-miR2111-3p	-	Pentatricopeptide repeat||Tetratricopeptide-like helical
VIT_09s0002g08100	vvi-miR3629a-3p	-	EF-hand-like domain||EF-Hand 1, calcium-binding site||Calcium-binding EF-hand
VIT_09s0002g08230	vvi-miR159c,vvi-miR319e	-	Cobalamin (vitamin B12) biosynthesis CobW-like, C-terminal
VIT_09s0002g08320	vvi-miR845c,vvi-miR845d,vvi-miR845a	-	Gag-polypeptide of LTR copia-type
VIT_09s0002g08470	vvi-miR3629a-5p	-	Alcohol dehydrogenase GroES-like||Alcohol dehydrogenase superfamily, zinc-type||GroES-like||NAD(P)-binding domain||Polyketide synthase, enoylreductase||Alcohol dehydrogenase, C-terminal
VIT_09s0002g08830	vvi-miR156b	-	DNA-binding, integrase-type||AP2/ERF domain
VIT_09s0002g09150	novel_141	-	WD40 repeat||G-protein beta WD-40 repeat||WD40-repeat-containing domain||WD40/YVTN repeat-like-containing domain
VIT_09s0002g09280	novel_141	-	Ovarian tumour, otubain
VIT_09s0018g00550	vvi-miR3629a-3p	-	Pentatricopeptide repeat
VIT_09s0018g00630	vvi-miR845a	-	Terpenoid cyclases/protein prenyltransferase alpha-alpha toroid||Terpene synthase, conserved site||Prenyltransferase/squalene oxidase||Squalene cyclase
VIT_09s0018g01620	vvi-miR159c,vvi-miR3631a-3p	-	Vps53-like, N-terminal
VIT_09s0018g01760	vvi-miR3629a-5p	-	GPI biosynthesis protein Pig-F
VIT_09s0018g01820	vvi-miR169v	-	Serine/threonine- / dual specificity protein kinase, catalytic domain||Serine/threonine-protein kinase, active site||Protein kinase-like domain||Protein kinase, ATP binding site||Protein kinase, catalytic domain
VIT_09s0018g01840	vvi-miR3626-5p	-	Sodium/calcium exchanger membrane region||Calcium/proton exchanger CAX||Calcium/proton exchanger
VIT_09s0018g02110	vvi-miR3629a-3p	-	GDP-fucose protein O-fucosyltransferase
VIT_09s0054g00440	vvi-miR3629a-3p	-	Zinc finger, NHR/GATA-type||CCT domain||Tify||Zinc finger, GATA-type
VIT_09s0054g00640	vvi-miR3629a-5p	-	N-acetyltransferase ESCO, zinc-finger||N-acetyltransferase ESCO, acetyl-transferase domain
VIT_09s0054g00720	vvi-miR3639-3p	-	Tetratricopeptide repeat||Tetratricopeptide-like helical||Tetratricopeptide repeat-containing domain
VIT_09s0054g00750	vvi-miR828a	-	Probable helicase MAGATAMA 3||P-loop containing nucleoside triphosphate hydrolase
VIT_09s0054g01030	vvi-miR3629a-3p	-	Mitochodrial transcription termination factor-related
VIT_09s0054g01080	vvi-miR3629a-3p	-	Pectin lyase fold/virulence factor||Pectin lyase fold
VIT_09s0054g01110	vvi-miR845a	-	Terpenoid cyclases/protein prenyltransferase alpha-alpha toroid||Squalene cyclase||Terpene synthase, conserved site
VIT_09s0054g01180	vvi-miR845d,vvi-miR845c	-	Prenyltransferase/squalene oxidase||Squalene cyclase||Terpenoid cyclases/protein prenyltransferase alpha-alpha toroid
VIT_09s0054g01250	vvi-miR3629a-3p	-	Terpenoid cyclases/protein prenyltransferase alpha-alpha toroid
VIT_09s0054g01520	vvi-miR845d,vvi-miR3629a-5p,vvi-miR845c	-	Squalene cyclase||Prenyltransferase/squalene oxidase||Terpene synthase, conserved site||Terpenoid cyclases/protein prenyltransferase alpha-alpha toroid
VIT_09s0054g01720	vvi-miR156b	-	Domain of unknown function DUF547
VIT_09s0070g00030	vvi-miR3629a-5p	-	Glycosyltransferase 39 like||MIR motif
VIT_09s0070g00210	vvi-miR3629a-5p	-	Natural resistance-associated macrophage protein
VIT_09s0070g00410	vvi-miR3629a-3p	-	Homeodomain-like||MYB-CC type transcription factor, LHEQLE-containing domain||Myb domain||Myb domain, plants||SANT/Myb domain
VIT_10s0003g00250	vvi-miR319e,vvi-miR3633a-5p,vvi-miR159c,vvi-miR845d	-	ACT domain||Glycosyl transferase, family 35||Glycogen/starch/alpha-glucan phosphorylase
VIT_10s0003g00670	vvi-miR394b	-	Armadillo-type fold||Armadillo-like helical||Apoptosis inhibitory 5
VIT_10s0003g00810	vvi-miR394b	-	Helicase-associated domain||Helicase, superfamily 1/2, ATP-binding domain||DNA/RNA helicase, ATP-dependent, DEAH-box type, conserved site||Helicase, C-terminal||P-loop containing nucleoside triphosphate hydrolase||Domain of unknown function DUF1605
VIT_10s0003g01880	vvi-miR390	-	Serine/threonine- / dual specificity protein kinase, catalytic domain||Serine/threonine-protein kinase, active site||Leucine-rich repeat||Protein kinase-like domain||Protein kinase, catalytic domain||Concanavalin A-like lectin/glucanase, subgroup||Serine-threonine/tyrosine-protein kinase catalytic domain||Malectin
VIT_10s0003g01890	vvi-miR390	-	Leucine-rich repeat
VIT_10s0003g02020	vvi-miR159a	-	Protein kinase, ATP binding site||Protein kinase-like domain||Serine/threonine-protein kinase, active site||Serine/threonine- / dual specificity protein kinase, catalytic domain||Concanavalin A-like lectin/glucanase, subgroup||Protein kinase, catalytic domain||Malectin
VIT_10s0003g02090	vvi-miR477a	-	SGNH hydrolase-type esterase domain||Lipase, GDSL
VIT_10s0003g02160	vvi-miR156a,vvi-miR319e,vvi-miR159c	-	Trehalose-phosphatase||HAD-like domain||Glycosyl transferase, family 20
VIT_10s0003g02210	vvi-miR396a,vvi-miR396b	-	Pentatricopeptide repeat
VIT_10s0003g02590	vvi-miR319e,vvi-miR159c	-	Arfaptin homology (AH) domain/BAR domain||Src homology-3 domain
VIT_10s0003g02690	vvi-miR403a	-	Dullard phosphatase domain, eukaryotic||HAD-like domain||NLI interacting factor
VIT_10s0003g02800	novel_141	-	Ion transport 2||EF-Hand 1, calcium-binding site||Two pore domain potassium channel, plant||EF-hand-like domain
VIT_10s0003g02930	vvi-miR390	-	Protein kinase-like domain||Protein kinase, catalytic domain||Leucine-rich repeat, typical subtype||Leucine-rich repeat
VIT_10s0003g03050	vvi-miR396a,vvi-miR396b	-	High mobility group (HMG) box domain
VIT_10s0003g03190	vvi-miR156a	-	Lupus La protein||RNA-binding protein Lupus La||Nucleotide-binding, alpha-beta plait||RNA recognition motif domain||Winged helix-turn-helix DNA-binding domain
VIT_10s0003g03290	vvi-miR408	-	Domain X||Reverse transcriptase
VIT_10s0003g03370	vvi-miR845c,vvi-miR845d	-	Gag-polypeptide of LTR copia-type
VIT_10s0003g03500	vvi-miR3626-5p	-	AAA+ ATPase domain||ATPase, AAA-type, core||P-loop containing nucleoside triphosphate hydrolase
VIT_10s0003g03510	vvi-miR3629a-3p	-	SGS||Siah interacting protein, N-terminal||HSP20-like chaperone||CS-like domain
VIT_10s0003g03540	vvi-miR3633b-5p	-	Terpenoid cyclases/protein prenyltransferase alpha-alpha toroid||Prenyltransferase/squalene oxidase
VIT_10s0003g03640	vvi-miR845c,vvi-miR845a,vvi-miR845d	-	Ribokinase-like||Protein kinase-like domain||Protein kinase, catalytic domain
VIT_10s0003g04360	vvi-miR394b	-	WD40-repeat-containing domain||Cleavage/polyadenylation specificity factor, A subunit, C-terminal||WD40/YVTN repeat-like-containing domain
VIT_10s0003g04390	vvi-miR156f,vvi-miR156b,vvi-miR156a	-	AAA+ ATPase domain||P-loop containing nucleoside triphosphate hydrolase||ABC transporter, conserved site||ABC transporter, transmembrane domain, type 1||ABC transporter-like
VIT_10s0003g04450	vvi-miR319e,vvi-miR159c	-	ABC transporter-like||ABC transporter, transmembrane domain, type 1||P-loop containing nucleoside triphosphate hydrolase
VIT_10s0003g04470	vvi-miR3629a-5p,vvi-miR845a,vvi-miR319e,vvi-miR159c	-	P-loop containing nucleoside triphosphate hydrolase||ABC transporter-like||ABC transporter, conserved site||ABC transporter, transmembrane domain, type 1||AAA+ ATPase domain
VIT_10s0003g04480	vvi-miR845c	-	Domain of unknown function DUF630||Domain of unknown function DUF632
VIT_10s0003g04750	vvi-miR3631a-3p,vvi-miR3631b-3p	-	Putative S-adenosyl-L-methionine-dependent methyltransferase MidA
VIT_10s0003g05020	vvi-miR399d,vvi-miR399g,vvi-miR535a	-	TGS-like domain||Beta-grasp domain||P-loop containing nucleoside triphosphate hydrolase||TGS-like||Domain of unknown function DUF933||Conserved hypothetical protein CHP00092||GTP binding domain||OBG-type guanine nucleotide-binding (G) domain
VIT_10s0003g05380	vvi-miR3629a-3p	-	Fatty acid hydroxylase
VIT_10s0042g00180	vvi-miR3629a-3p	-	E2F-associated phosphoprotein
VIT_10s0042g00610	vvi-miR3632-3p,vvi-miR845c,vvi-miR845d	-	Serine/threonine- / dual specificity protein kinase, catalytic domain||Integrase, catalytic core||Leucine rich repeat 4||Protein kinase-like domain||Tyrosine-protein kinase, active site||Ribonuclease H-like domain||Protein kinase, catalytic domain||Reverse transcriptase, RNA-dependent DNA polymerase
VIT_10s0042g00950	vvi-miR845a	-	ATP-citrate lyase/succinyl-CoA ligase||NAD(P)-binding domain||ATP-citrate lyase/succinyl-CoA ligase, active site||Succinyl-CoA ligase, alpha subunit||Succinyl-CoA synthetase-like||CoA-binding
VIT_10s0042g01150	vvi-miR403a	-	Argonaute/Dicer protein, PAZ||Ribonuclease H-like domain||Domain of unknown function DUF1785||Stem cell self-renewal protein Piwi
VIT_10s0042g01180	vvi-miR403a	-	Ribonuclease H-like domain||Argonaute/Dicer protein, PAZ||Domain of unknown function DUF1785||Stem cell self-renewal protein Piwi
VIT_10s0071g00930	vvi-miR396a,vvi-miR396b	-	Peptidase S9A, N-terminal domain||Alpha/Beta hydrolase fold||Peptidase S9, prolyl oligopeptidase, catalytic domain||Peptidase S9A, prolyl oligopeptidase
VIT_10s0071g00950	vvi-miR172c,vvi-miR172b	-	Metallophosphoesterase domain||Metallo-dependent phosphatase-like||Serine/threonine-specific protein phosphatase/bis(5-nucleosyl)-tetraphosphatase
VIT_10s0071g00980	vvi-miR2111-3p	-	Protein of unknown function DUF639
VIT_10s0116g00020	vvi-miR3623-5p	-	Domain of unknown function DUF1084
VIT_10s0116g00050	vvi-miR3629a-3p,vvi-miR3629a-5p	-	Protein kinase-like domain
VIT_10s0116g00100	vvi-miR3629a-3p,vvi-miR3629a-5p	-	Concanavalin A-like lectin/glucanase, subgroup||Protein kinase, catalytic domain||Leucine-rich repeat||Protein kinase-like domain||Leucine-rich repeat-containing N-terminal, type 2
VIT_10s0116g00210	vvi-miR3626-3p	-	UBX||Ubiquitin-related domain||SEP domain
VIT_10s0116g00290	vvi-miR3626-3p	-	SEP domain
VIT_10s0116g00670	vvi-miR159c	-	CTLH/CRA C-terminal to LisH motif domain||CRA domain||Reverse transcriptase, RNA-dependent DNA polymerase||LisH dimerisation motif||CTLH, C-terminal LisH motif
VIT_10s0116g00700	vvi-miR403a	-	Zinc finger, RING-type||Helicase, C-terminal||Helicase, superfamily 1/2, ATP-binding domain||SNF2-related||Zinc finger, RING-type, conserved site||Zinc finger, RING/FYVE/PHD-type||P-loop containing nucleoside triphosphate hydrolase
VIT_10s0116g00910	vvi-miR3626-5p	-	Serine/threonine-protein kinase, active site||Serine/threonine- / dual specificity protein kinase, catalytic domain||Protein kinase, ATP binding site||Protein kinase-like domain||Serine-threonine/tyrosine-protein kinase catalytic domain||Protein kinase, catalytic domain||Concanavalin A-like lectin/glucanase, subgroup
VIT_10s0116g00950	vvi-miR396b,vvi-miR396a	-	HAD-like domain
VIT_10s0116g00980	vvi-miR3629a-5p	-	Glycosyl transferase, family 14
VIT_10s0116g01650	vvi-miR3631b-3p	-	Thioredoxin-like fold||Thioredoxin domain||Thioredoxin-independent 5'-adenylylsulphate reductase||Phosphoadenosine phosphosulphate reductase||Rossmann-like alpha/beta/alpha sandwich fold
VIT_10s0116g01710	vvi-miR3629a-5p	-	Domain of unknown function DUF4094||Glycosyl transferase, family 31
VIT_10s0116g01840	vvi-miR398a	-	Protein of unknown function DUF4228
VIT_10s0116g01860	novel_141	-	Multi antimicrobial extrusion protein
VIT_10s0597g00040	vvi-miR396b	-	Tetratricopeptide-like helical||Pentatricopeptide repeat
VIT_11s0016g00160	novel_141,vvi-miR845d	-	Tensin phosphatase, C2 domain||Protein-tyrosine phosphatase-like||C2 calcium-dependent membrane targeting||Actin-binding FH2
VIT_11s0016g00190	vvi-miR845d,vvi-miR845a,vvi-miR845c	-	Domain of unknown function DUF547||Ternary complex factor MIP1, leucine-zipper
VIT_11s0016g00350	vvi-miR3630-3p,novel_141	-	Cullin repeat-like-containing domain||Conserved oligomeric Golgi complex, subunit 3
VIT_11s0016g00450	vvi-miR169t,vvi-miR169o,vvi-miR169r	-	SAC3/GANP/Nin1/mts3/eIF-3 p25||Armadillo-type fold||Translation initiation factor 3, subunit 12, N-terminal, eukaryotic||Eukaryotic translation initiation factor 3 subunit K||Winged helix-turn-helix DNA-binding domain
VIT_11s0016g00640	vvi-miR390	-	Phox/Bem1p||AUX/IAA protein||Auxin response factor||DNA-binding pseudobarrel domain||B3 DNA binding domain
VIT_11s0016g00800	vvi-miR156a	-	Organic solute transporter Ost-alpha
VIT_11s0016g01120	vvi-miR3629a-3p	-	Tubulin-tyrosine ligase||Tubulin--tyrosine ligase-like protein 12
VIT_11s0016g01180	vvi-miR156e,vvi-miR3623-5p	-	Leucine-rich repeat, cysteine-containing subtype
VIT_11s0016g01480	vvi-miR156e,vvi-miR169f,vvi-miR169l,vvi-miR169e,vvi-miR169v,vvi-miR169m,vvi-miR169a,vvi-miR169x,vvi-miR169o	-	CCAAT-binding transcription factor, subunit B
VIT_11s0016g01500	vvi-miR3629a-5p	-	Zinc finger, FYVE/PHD-type||Zinc finger, PHD-type, conserved site||Zinc finger, PHD-finger||Zinc finger, PHD-type||Zinc finger, RING/FYVE/PHD-type||Protein of unknown function DUF3594
VIT_11s0016g01650	vvi-miR156f	-	PGG domain||Ankyrin repeat-containing domain||Caskin/Ankyrin repeat-containing protein||Ankyrin repeat
VIT_11s0016g01800	vvi-miR3629a-3p	-	Serine/threonine-protein kinase, active site||Serine/threonine- / dual specificity protein kinase, catalytic domain||Protein kinase, ATP binding site||Protein kinase-like domain||Protein kinase, C-terminal||AGC-kinase, C-terminal||Protein kinase, catalytic domain
VIT_11s0016g02010	vvi-miR3629a-5p	-	Survival protein SurE-like phosphatase/nucleotidase||Heat shock factor (HSF)-type, DNA-binding||Winged helix-turn-helix DNA-binding domain
VIT_11s0016g02130	vvi-miR159c,vvi-miR319e	-	Cwf19-like, C-terminal domain-1||Zinc finger, CCCH-type||HIT-like domain||Cwf19-like protein, C-terminal domain-2
VIT_11s0016g02480	novel_141	-	Phosphatase PHOSPHO-type||HAD-like domain||Pyridoxal phosphate phosphatase-related||HAD-superfamily hydrolase, subfamily IB, PSPase-like
VIT_11s0016g02870	vvi-miR3629a-5p	-	Peptidase M16 domain||Peptidase M16, N-terminal||Metalloenzyme, LuxS/M16 peptidase-like||Peptidase M16, zinc-binding site||Peptidase M16, C-terminal domain
VIT_11s0016g03020	novel_141	-	Pectin lyase fold/virulence factor||Pectinesterase, active site||Pectinesterase, catalytic||Pectin lyase fold
VIT_11s0016g03160	novel_141	-	AAA+ ATPase domain||P-loop containing nucleoside triphosphate hydrolase||ABC transporter, transmembrane domain, type 1||ABC transporter, conserved site||ABC transporter-like
VIT_11s0016g03220	vvi-miR156e	-	RNA-dependent RNA polymerase, eukaryotic-type
VIT_11s0016g03450	vvi-miR3639-3p	-	Bicoid-interacting 3||Bin3-type S-adenosyl-L-methionine binding domain||S-adenosyl-L-methionine-dependent methyltransferase-like
VIT_11s0016g03960	vvi-miR156b	-	Kinesin, motor region, conserved site||Kinesin, motor domain||P-loop containing nucleoside triphosphate hydrolase||Kinesin-like protein
VIT_11s0016g03990	vvi-miR477a	-	P-loop containing nucleoside triphosphate hydrolase||NB-ARC
VIT_11s0016g04180	vvi-miR3629a-5p	-	WD40/YVTN repeat-like-containing domain||Tetratricopeptide-like helical||WD40 repeat||Coatomer beta' subunit (COPB2)||Coatomer, WD associated region||G-protein beta WD-40 repeat||WD40-repeat-containing domain
VIT_11s0016g04200	vvi-miR3636-5p	-	TMS membrane protein/tumour differentially expressed protein
VIT_11s0016g04230	vvi-miR845d	-	Protein of unknown function DUF538
VIT_11s0016g04300	vvi-miR3629a-3p	-	NUDIX hydrolase domain||NUDIX hydrolase domain-like
VIT_11s0016g04320	vvi-miR3629a-3p	-	NUDIX hydrolase domain-like||NUDIX hydrolase domain
VIT_11s0016g04740	vvi-miR156a	-	Bicarbonate transporter, eukaryotic||Bicarbonate transporter, C-terminal
VIT_11s0016g04820	vvi-miR3629a-3p	-	Agenet-like domain||Tudor-like, plant
VIT_11s0016g04940	vvi-miR159c	-	Zinc finger, CCCH-type
VIT_11s0016g05010	vvi-miR319b,vvi-miR159c,vvi-miR319g,vvi-miR319e,vvi-miR159a	-	Glyoxalase-like domain||Glyoxalase/Bleomycin resistance protein/Dihydroxybiphenyl dioxygenase
VIT_11s0016g05090	vvi-miR3629a-5p,vvi-miR3629a-3p	-	Helicase, superfamily 1/2, ATP-binding domain||Helicase, C-terminal||RNA helicase, DEAD-box type, Q motif||P-loop containing nucleoside triphosphate hydrolase||DNA/RNA helicase, DEAD/DEAH box type, N-terminal
VIT_11s0016g05110	vvi-miR3626-3p	-	Mitochondrial carrier domain||Mitochondrial carrier protein||Mitochondrial substrate/solute carrier
VIT_11s0016g05130	novel_141	-	Peptidase S24/S26A/S26B||Peptidase S24/S26A/S26B/S26C||Peptidase S26B, eukaryotic signal peptidase||Peptidase S24/S26, beta-ribbon domain
VIT_11s0016g05170	vvi-miR156a	-	Proton-dependent oligopeptide transporter family||PTR2 family proton/oligopeptide symporter, conserved site||Major facilitator superfamily domain
VIT_11s0016g05240	vvi-miR845c,vvi-miR845d	-	Nucleoporin Nup186/Nup192/Nup205
VIT_11s0016g05250	vvi-miR159c,vvi-miR319e,vvi-miR845d	-	Methyltransferase FkbM||S-adenosyl-L-methionine-dependent methyltransferase-like
VIT_11s0016g05280	vvi-miR845a	-	Haem peroxidase, plant/fungal/bacterial||Peroxidases heam-ligand binding site||Plant peroxidase||Haem peroxidase
VIT_11s0016g05310	vvi-miR3631a-3p,vvi-miR3631a-5p	-	Peroxidases heam-ligand binding site||Haem peroxidase||Haem peroxidase, plant/fungal/bacterial
VIT_11s0016g05390	vvi-miR3629a-5p	-	Ribosomal protein L36
VIT_11s0016g05660	vvi-miR828a	-	SANT/Myb domain||Myb domain||Homeodomain-like
VIT_11s0016g05790	vvi-miR3629a-3p	-	Rif1||Rap1-interacting factor 1 N-terminal||Armadillo-type fold
VIT_11s0016g05810	vvi-miR169v	-	Ankyrin repeat||Cyclic nucleotide-binding domain||Ankyrin repeat-containing domain||Potassium channel, voltage-dependent, EAG/ELK/ERG||Potassium channel, plant-type||Cyclic nucleotide-binding-like||RmlC-like jelly roll fold||Ion transport domain
VIT_11s0037g00130	vvi-miR396b,vvi-miR3638-3p,vvi-miR396a	-	Pre-mRNA polyadenylation factor Fip1
VIT_11s0037g00320	novel_141	-	Peptidase S10, serine carboxypeptidase||Peptidase S10, serine carboxypeptidase, active site||Alpha/Beta hydrolase fold
VIT_11s0037g00750	vvi-miR845c,vvi-miR845a,vvi-miR845d	-	Cdk-activating kinase assembly factor MAT1, centre||Cdk-activating kinase assembly factor MAT1/Tfb3
VIT_11s0037g01040	vvi-miR2950-5p	-	HAD-like domain||HAD-superfamily hydrolase, subfamily IG, 5'-nucleotidase
VIT_11s0037g01120	vvi-miR3632-3p	-	Cytochrome c oxidase, subunit VIb
VIT_11s0052g00180	vvi-miR3629a-3p	-	Las1-like
VIT_11s0052g00330	vvi-miR3629a-5p	-	Aromatic-ring-hydroxylating dioxygenase, alpha subunit||Aromatic-ring-hydroxylating dioxygenase, alpha subunit, C-terminal domain||Rieske [2Fe-2S] iron-sulphur domain
VIT_11s0052g00930	vvi-miR159c,vvi-miR319e	-	SET domain
VIT_11s0052g01400	vvi-miR394b,vvi-miR394a	-	Carbohydrate kinase, FGGY, C-terminal||Carbohydrate kinase, FGGY, N-terminal||Carbohydrate kinase, FGGY-related
VIT_11s0052g01470	vvi-miR845d,vvi-miR845c	-	Serine/threonine- / dual specificity protein kinase, catalytic domain||Protein kinase-like domain||Protein kinase, ATP binding site||Leucine-rich repeat||Leucine-rich repeat, typical subtype||Protein kinase, catalytic domain
VIT_11s0052g01660	novel_141	-	Domain of unknown function DUF676, lipase-like||Alpha/Beta hydrolase fold
VIT_11s0052g01840	vvi-miR2950-5p,vvi-miR477b-5p	-	Diacylglycerol kinase, accessory domain||Diacylglycerol kinase, catalytic domain||ATP-NAD kinase-like domain||Diacylglycerol kinase, plant
VIT_11s0052g01850	vvi-miR3638-5p,vvi-miR845a	-	TFIIEalpha/SarR/Rpc3 HTH domain||Winged helix-turn-helix DNA-binding domain||Zinc finger, RING/FYVE/PHD-type||Transcription factor TFE/TFIIEalpha HTH domain||Transcription factor TFIIE, alpha subunit
VIT_11s0065g00150	novel_141	-	Starch synthase, catalytic domain||Glycosyl transferase, family 1||Glycogen/starch synthases, ADP-glucose type
VIT_11s0065g00300	vvi-miR845d,vvi-miR159c	-	GHMP kinase, C-terminal domain
VIT_11s0065g00850	vvi-miR845d	-	Chlorophyll A-B binding protein||Chlorophyll a/b binding protein domain
VIT_11s0078g00310	vvi-miR845d,vvi-miR845c	-	Glycosyl hydrolase, family 13, all-beta||Glycoside hydrolase, superfamily||Glycosyl hydrolase, family 13, subfamily, catalytic domain||Glycoside hydrolase, catalytic domain||Glycoside hydrolase, family 13||Glycosyl hydrolase, family 13, catalytic domain
VIT_11s0078g00400	vvi-miR3623-5p	-	Auxin responsive SAUR protein
VIT_11s0078g00420	vvi-miR2950-5p	-	Ribosomal protein S5 domain 2-type fold, subgroup||Ribosomal protein S5 domain 2-type fold
VIT_11s0078g00430	vvi-miR845a	-	Mevalonate/galactokinase||Ribosomal protein S5 domain 2-type fold||GHMP kinase, C-terminal domain||Galactokinase||Ribosomal protein S5 domain 2-type fold, subgroup
VIT_11s0103g00310	vvi-miR172d	-	Domain of unknown function DUF632||Domain of unknown function DUF630
VIT_11s0103g00490	vvi-miR3639-3p	-	Glycosyl transferase, family 14
VIT_11s0103g00550	vvi-miR3629a-5p	-	Proteinase inhibitor I9||Peptidase S8, subtilisin-related||Peptidase S8/S53 domain||Proteinase inhibitor, propeptide||Protease-associated domain, PA||Peptidase S8A, DUF1034 C-terminal||Peptidase S8, subtilisin, Ser-active site||Peptidase S8, subtilisin, Asp-active site
VIT_11s0118g00220	vvi-miR156b	-	Chloride channel ClC-plant||Chloride channel, core||Cystathionine beta-synthase, core||Chloride channel, voltage gated
VIT_11s0118g00510	vvi-miR3639-3p	-	Ubiquitin||Ubiquitin-associated/translation elongation factor EF1B, N-terminal, eukaryote||UBA-like||Ubiquitin-associated/translation elongation factor EF1B, N-terminal||Ubiquitin-related domain
VIT_11s0149g00100	vvi-miR3629a-5p	-	Helicase, superfamily 1/2, ATP-binding domain||P-loop containing nucleoside triphosphate hydrolase||DNA/RNA helicase, DEAD/DEAH box type, N-terminal
VIT_11s0149g00210	vvi-miR3629a-5p	-	H+ transporting P-type ATPase, subfamily IIIA||P-type ATPase, cytoplasmic domain N||Cation-transporting P-type ATPase, N-terminal||P-type ATPase, transmembrane domain||P-type ATPase, phosphorylation site||P-type ATPase, A domain||Cation-transporting P-type ATPase||HAD-like domain
VIT_11s0206g00150	vvi-miR3629a-3p	-	Metallo-dependent phosphatase-like
VIT_12s0028g00350	vvi-miR156a	-	Chaperonin TCP-1, conserved site||TCP-1-like chaperonin intermediate domain||Chaperonin Cpn60/TCP-1||GroEL-like equatorial domain||T-complex protein 1, epsilon subunit||GroEL-like apical domain||Chaperone, tailless complex polypeptide 1
VIT_12s0028g00400	vvi-miR169v	-	Callose synthase||Glycosyl transferase, family 48||1,3-beta-glucan synthase subunit FKS1-like, domain-1
VIT_12s0028g00440	vvi-miR3629a-5p	-	Protein phosphatase 2C||Protein phosphatase 2C (PP2C)-like
VIT_12s0028g00540	vvi-miR172a	-	Alpha/Beta hydrolase fold||Alpha/beta hydrolase fold-1||Epoxide hydrolase-like
VIT_12s0028g00630	novel_141	-	Beta-lactamase-like
VIT_12s0028g01110	vvi-miR3633a-5p	-	Myc-type, basic helix-loop-helix (bHLH) domain||Basic helix-loop-helix (bHLH) transcription factors ALC-like, plant
VIT_12s0028g01140	vvi-miR156f	-	Pentatricopeptide repeat||Tetratricopeptide-like helical
VIT_12s0028g01170	vvi-miR169l,vvi-miR169o,vvi-miR169x,vvi-miR169f,vvi-miR169m,vvi-miR169a,vvi-miR167c	-	B3 DNA binding domain||DNA-binding pseudobarrel domain||Auxin response factor||Phox/Bem1p||AUX/IAA protein
VIT_12s0028g01200	vvi-miR3629a-5p	-	Zinc finger, RING/FYVE/PHD-type||Zinc finger, RING-CH-type
VIT_12s0028g01230	vvi-miR159c	-	Fanconi anaemia protein FANCD2||Armadillo-like helical
VIT_12s0028g01350	vvi-miR3629a-5p	-	Protein kinase-like domain||Protein kinase, catalytic domain||Concanavalin A-like lectin/glucanase, subgroup||Malectin||Serine-threonine/tyrosine-protein kinase catalytic domain||Protein kinase, ATP binding site||Serine/threonine-protein kinase, active site||Serine/threonine- / dual specificity protein kinase, catalytic domain||Leucine-rich repeat
VIT_12s0028g01370	vvi-miR3631a-3p	-	PMR5 N-terminal domain||PC-Esterase||Protein trichome birefringence-like 36-43||Trichome birefringence-like family
VIT_12s0028g01750	vvi-miR3629a-5p,vvi-miR156a	-	Peptidoglycan-binding lysin domain
VIT_12s0028g01860	vvi-miR845d,vvi-miR845c	-	Leucine-rich repeat||Concanavalin A-like lectin/glucanase, subgroup||Protein kinase, catalytic domain||Leucine-rich repeat, typical subtype||Serine/threonine-protein kinase, active site||Serine/threonine- / dual specificity protein kinase, catalytic domain||Protein kinase-like domain
VIT_12s0028g03350	vvi-miR156a,vvi-miR156b,vvi-miR156e,vvi-miR156f	-	Transcription factor, SBP-box
VIT_12s0028g03700	vvi-miR396b,vvi-miR396a	-	Ion transport domain||Two pore calcium channel protein 1
VIT_12s0028g03940	vvi-miR2950-5p	-	Bromodomain, conserved site||Ubiquitin-related domain||TAFII-230 TBP-binding||Transcription initiation factor TFIID subunit 1, domain of unknown function||Ubiquitin||Bromodomain
VIT_12s0034g00660	vvi-miR156a	-	Protein kinase-like domain||Serine/threonine- / dual specificity protein kinase, catalytic domain||Serine/threonine-protein kinase, active site||Leucine-rich repeat, typical subtype||Protein kinase, catalytic domain||Leucine-rich repeat||Leucine rich repeat 4
VIT_12s0034g00670	novel_141	-	Kinetochore protein Ndc80
VIT_12s0034g00750	novel_141	-	Protein kinase, catalytic domain||Serine/threonine- / dual specificity protein kinase, catalytic domain||Serine/threonine-protein kinase, active site||Protein kinase-like domain
VIT_12s0034g00850	vvi-miR3631b-3p,vvi-miR3631a-3p	-	Leucine-rich repeat, typical subtype||P-loop containing nucleoside triphosphate hydrolase||Toll/interleukin-1 receptor homology (TIR) domain||Leucine rich repeat 4||Leucine-rich repeat||NB-ARC||Leucine-rich repeat 3
VIT_12s0034g01010	vvi-miR169t,vvi-miR169r	-	Exon junction complex, Pym
VIT_12s0034g01130	vvi-miR3629a-5p	-	UDP-glucuronosyl/UDP-glucosyltransferase
VIT_12s0034g01140	vvi-miR408	-	Cupredoxin||Plastocyanin-like||Blue (type 1) copper protein, binding site
VIT_12s0034g01150	vvi-miR408	-	Cupredoxin||Plastocyanin-like
VIT_12s0034g01930	vvi-miR845c,vvi-miR845d	-	11-S seed storage protein, plant||RmlC-like jelly roll fold||RmlC-like cupin domain||Cupin 1
VIT_12s0034g02140	vvi-miR319e,vvi-miR159c	-	Membralin
VIT_12s0034g02180	vvi-miR156b	-	Glycine cleavage T-protein/YgfZ, C-terminal domain||Glycine cleavage T-protein, N-terminal||YgfZ/GcvT conserved site||GTP-binding protein TrmE/Glycine cleavage system T protein, domain 1||Glycine cleavage T-protein, C-terminal barrel
VIT_12s0034g02390	vvi-miR3629a-5p	-	T-complex 11
VIT_12s0035g00200	vvi-miR399a	-	Phospholipase D family||Phospholipase D, C-terminal||Phospholipase D/Transphosphatidylase
VIT_12s0035g00620	vvi-miR3629a-3p	-	Basic-leucine zipper domain
VIT_12s0035g00660	vvi-miR845d,vvi-miR845c	-	Zinc finger C2H2-type/integrase DNA-binding domain||Zinc finger, C2H2||Zinc finger, C2H2-like
VIT_12s0035g00800	vvi-miR159c,vvi-miR394b,vvi-miR319e	-	P-loop containing nucleoside triphosphate hydrolase||Domain of unknown function DUF1605||DNA/RNA helicase, DEAD/DEAH box type, N-terminal||Helicase, C-terminal||Helicase, superfamily 1/2, ATP-binding domain||Helicase-associated domain
VIT_12s0035g00810	vvi-miR3629a-5p	-	Transmembrane protein 18
VIT_12s0035g00890	novel_141	-	NAD(P)-binding domain||CASTOR/POLLUX/SYM8 ion channels||Regulator of K+ conductance, C-terminal
VIT_12s0035g00910	vvi-miR3629a-5p	-	Bile acid:sodium symporter
VIT_12s0035g00920	vvi-miR3637-5p	-	Protein of unknown function DUF679
VIT_12s0035g00960	vvi-miR3629a-5p	-	Pseudouridine synthase I, TruA||Pseudouridine synthase I, TruA, C-terminal||Pseudouridine synthase, catalytic domain||Pseudouridine synthase I, TruA, N-terminal||Pseudouridine synthase I, TruA, alpha/beta domain
VIT_12s0035g01330	vvi-miR3630-5p	-	P-loop containing nucleoside triphosphate hydrolase||Leucine-rich repeat||NB-ARC
VIT_12s0035g01430	vvi-miR394b	-	Zinc finger, PHD-type||GYF||Zinc finger, RING/FYVE/PHD-type||Zinc finger, FYVE/PHD-type||Plus-3||Plus-3 domain, subgroup||SWIB/MDM2 domain
VIT_12s0035g01750	vvi-miR396b	-	Acyl-CoA N-acyltransferase||Protein of unknown function DUF482
VIT_12s0035g01770	vvi-miR396b	-	S-adenosyl-L-methionine-dependent methyltransferase-like||C-5 cytosine methyltransferase||DNA methylase, C-5 cytosine-specific, active site
VIT_12s0035g01780	vvi-miR2950-3p	-	Glucose/ribitol dehydrogenase||Short-chain dehydrogenase/reductase, conserved site||Short-chain dehydrogenase/reductase SDR||NAD(P)-binding domain
VIT_12s0035g01860	vvi-miR396b	-	ATPase, AAA-type, core||P-loop containing nucleoside triphosphate hydrolase||Clp protease, ATP-binding subunit ClpX||Clp ATPase, C-terminal||AAA+ ATPase domain
VIT_12s0055g00360	vvi-miR477b-3p	-	Pinin/SDK/MemA protein
VIT_12s0055g00420	vvi-miR3629a-3p	-	Basic-leucine zipper domain||Protein ABSCISIC ACID-INSENSITIVE 5
VIT_12s0055g00430	novel_141	-	Alpha/Beta hydrolase fold||Protein of unknown function DUF3657||Domain of unknown function DUF676, lipase-like
VIT_12s0055g00710	vvi-miR159c,vvi-miR319e	-	Calcium-binding EF-hand||EF-Hand 1, calcium-binding site||Phosphatidylserine decarboxylase-related||EF-hand-like domain
VIT_12s0055g00900	vvi-miR3629a-5p	-	WD40 repeat||G-protein beta WD-40 repeat||WD40-repeat-containing domain||WD40/YVTN repeat-like-containing domain
VIT_12s0055g00930	vvi-miR394b	-	Heavy metal-associated domain, HMA
VIT_12s0057g00120	vvi-miR3633a-5p	-	Protein of unknown function wound-induced
VIT_12s0057g00380	vvi-miR159c	-	Glycoside hydrolase, family 28||Pectin lyase fold||Pectin lyase fold/virulence factor||Parallel beta-helix repeat
VIT_12s0057g00890	vvi-miR3629a-3p	-	Glycoside hydrolase, superfamily||X8||Glycoside hydrolase, family 17||Glycoside hydrolase, catalytic domain
VIT_12s0057g01100	vvi-miR845c,vvi-miR845d,vvi-miR845a	-	NUDIX hydrolase domain||NUDIX hydrolase, conserved site||Nudix hydrolase 6-like||NUDIX hydrolase domain-like
VIT_12s0057g01210	novel_141,vvi-miR156b	-	Pathogenic type III effector avirulence factor Avr cleavage site
VIT_12s0059g00180	vvi-miR3629a-5p	-	Tetraspanin/Peripherin
VIT_12s0059g00540	vvi-miR3629a-3p	-	DNA (cytosine-5)-methyltransferase 1, replication foci domain
VIT_12s0059g00650	vvi-miR171b,vvi-miR171a,vvi-miR171h,vvi-miR171e,vvi-miR171f	-	DVL
VIT_12s0059g00760	vvi-miR395a	-	Thioredoxin-like fold||Thioredoxin domain||Thioredoxin-independent 5'-adenylylsulphate reductase||Adenosine 5'-phosphosulphate reductase||Phosphoadenosine phosphosulphate reductase||Rossmann-like alpha/beta/alpha sandwich fold
VIT_12s0059g01070	vvi-miR159c	-	Condensin complex subunit 2/barren
VIT_12s0059g01280	novel_141	-	Nucleobase-ascorbate transporter 1/2||Xanthine/uracil/vitamin C permease
VIT_12s0059g01350	novel_141	-	P-loop containing nucleoside triphosphate hydrolase
VIT_12s0059g01590	vvi-miR477a	-	SGNH hydrolase-type esterase domain||Lipase, GDSL
VIT_12s0059g01800	novel_141	-	Protein of unknown function DUF789
VIT_12s0121g00080	vvi-miR397a	-	von Willebrand factor, type A||Protein BONZAI||C2 calcium-dependent membrane targeting||Copine
VIT_12s0121g00290	vvi-miR3631b-3p	-	P-loop containing nucleoside triphosphate hydrolase||ATP-NAD kinase-like domain||NB-ARC||Diacylglycerol kinase, accessory domain
VIT_12s0121g00300	vvi-miR845a,vvi-miR845c	-	Leucine-rich repeat-containing N-terminal, type 2||Somatic embryogenesis receptor-like kinase||Leucine-rich repeat||Leucine rich repeat 4
VIT_12s0121g00310	vvi-miR845d,vvi-miR845a,vvi-miR845c	-	Protein kinase-like domain||Somatic embryogenesis receptor-like kinase||Protein kinase, catalytic domain
VIT_12s0142g00170	vvi-miR3629a-3p,vvi-miR845d	-	K+ potassium transporter
VIT_12s0142g00330	vvi-miR319e,vvi-miR159c	-	Cation-transporting P-type ATPase||Cation-transporting P-type ATPase, subfamily IB||P-type ATPase, phosphorylation site||P-type ATPase, A domain||HAD-like domain||P-type ATPase, cytoplasmic domain N
VIT_12s0142g00700	vvi-miR845d,vvi-miR3632-3p,vvi-miR845c	-	Serine/threonine- / dual specificity protein kinase, catalytic domain||Serine/threonine-protein kinase, active site||Protein kinase-like domain||Protein kinase, catalytic domain
VIT_12s0142g00760	novel_141	-	Protein kinase, ATP binding site||Leucine-rich repeat, typical subtype||Leucine-rich repeat||Leucine rich repeat 4||Protein kinase-like domain||Tyrosine-protein kinase, active site||Concanavalin A-like lectin/glucanase, subgroup||Protein kinase, catalytic domain
VIT_13s0019g00010	vvi-miR3629a-5p	-	Sulphate anion transporter, conserved site||Sulfate transporter N-terminal domain with GLY motif||STAS domain||Sulphate anion transporter||Sulphate transporter
VIT_13s0019g00880	vvi-miR3629a-5p	-	P-loop containing nucleoside triphosphate hydrolase||CWF11 family
VIT_13s0019g01050	vvi-miR156f	-	NB-ARC||Leucine-rich repeat||P-loop containing nucleoside triphosphate hydrolase
VIT_13s0019g01230	vvi-miR169v	-	Glycosyl transferase, family 2||Nucleotide-diphospho-sugar transferases
VIT_13s0019g01450	vvi-miR159c	-	FMN-binding split barrel
VIT_13s0019g01670	vvi-miR3629a-5p	-	Myb domain||Telomere repeat-binding protein, plant||SANT/Myb domain||Ubiquitin-related domain||Homeodomain-like
VIT_13s0019g01810	vvi-miR156a	-	Transcription factor GRAS
VIT_13s0019g01920	vvi-miR397a	-	Multicopper oxidase, type 2||Laccase||Multicopper oxidase, copper-binding site||Multicopper oxidase, type 3||Multicopper oxidase, type 1||Cupredoxin
VIT_13s0019g01930	vvi-miR397a	-	Multicopper oxidase, type 2||Multicopper oxidase, copper-binding site||Laccase||Cupredoxin||Multicopper oxidase, type 1||Multicopper oxidase, type 3
VIT_13s0019g01940	vvi-miR397a	-	Multicopper oxidase, type 2||Laccase||Multicopper oxidase, copper-binding site||Multicopper oxidase, type 3||Multicopper oxidase, type 1||Cupredoxin
VIT_13s0019g02150	vvi-miR397a	-	Multicopper oxidase, copper-binding site||Laccase||Cupredoxin||Multicopper oxidase, type 1||Multicopper oxidase, type 3||Multicopper oxidase, type 2
VIT_13s0019g02160	vvi-miR397a	-	Multicopper oxidase, type 2||Cupredoxin||Multicopper oxidase, type 3||Multicopper oxidase, type 1||Multicopper oxidase, copper-binding site||Laccase
VIT_13s0019g02360	vvi-miR3629a-5p	-	Gamma-glutamyl phosphate reductase GPR, conserved site||Aldehyde dehydrogenase, N-terminal||Delta l-pyrroline-5-carboxylate synthetase||Gamma-glutamyl phosphate reductase GPR||Glutamate 5-kinase/delta-1-pyrroline-5-carboxylate synthase||Glutamate/acetylglutamate kinase||Aldehyde dehydrogenase domain||Aldehyde dehydrogenase, C-terminal||Aldehyde/histidinol dehydrogenase||Aspartate/glutamate/uridyl…
VIT_13s0019g02860	vvi-miR3629a-5p	-	UDP-glucuronosyl/UDP-glucosyltransferase
VIT_13s0019g02940	vvi-miR171a	-	UDP-glucuronosyl/UDP-glucosyltransferase
VIT_13s0019g03320	vvi-miR156a	-	Acid phosphatase (Class B)
VIT_13s0019g03480	vvi-miR156f	-	HAD-superfamily hydrolase, subfamily IIA||HAD-like domain||HAD-superfamily hydrolase, subfamily IIA, CECR5
VIT_13s0019g03490	vvi-miR3629a-3p	-	Zinc finger, CCCH-type
VIT_13s0019g03540	vvi-miR3631a-5p,vvi-miR169o	-	MIF4G-like, type 3||Up-frameshift suppressor 2||MIF4-like, type 1/2/3||Armadillo-type fold
VIT_13s0019g03550	vvi-miR172d,vvi-miR172b,vvi-miR172c,vvi-miR172a	-	AP2-like ethylene-responsive transcription factor||DNA-binding, integrase-type||AP2/ERF domain
VIT_13s0019g03560	vvi-miR3629a-5p	-	Protein of unknown function DUF155
VIT_13s0019g03960	vvi-miR319e,vvi-miR159c	-	Taxilin family
VIT_13s0019g04100	vvi-miR159c,vvi-miR159a	-	Zinc finger, RING-type||Zinc finger, RING/FYVE/PHD-type
VIT_13s0019g04240	vvi-miR845a,vvi-miR3629a-5p,vvi-miR396b,vvi-miR396a	-	Thioredoxin, conserved site||Thioredoxin domain||Protein disulphide isomerase||Thioredoxin-like fold
VIT_13s0019g04260	novel_141	-	Alpha/beta hydrolase, N-terminal||Alpha/Beta hydrolase fold
VIT_13s0019g04350	vvi-miR3633a-5p	-	Peptidase M28
VIT_13s0019g04360	vvi-miR394b	-	Acyl-CoA N-acyltransferase||GNAT domain
VIT_13s0019g04660	vvi-miR172b	-	Amino acid transporter, transmembrane
VIT_13s0019g04860	vvi-miR394b	-	Uncharacterised protein family UPF0402
VIT_13s0019g05000	vvi-miR167c	-	Sec1-like, domain 2||Sec1-like protein
VIT_13s0019g05230	vvi-miR3629a-5p	-	No apical meristem (NAM) protein
VIT_13s0047g00050	vvi-miR159a	-	Major facilitator superfamily||Major facilitator superfamily domain
VIT_13s0047g00200	vvi-miR3631a-5p	-	Protease-associated domain, PA||Proteinase inhibitor I9||Peptidase S8/S53 domain||Peptidase S8, subtilisin, Ser-active site||Peptidase S8, subtilisin-related
VIT_13s0047g00330	vvi-miR3639-3p	-	MULE transposase domain||FHY3/FAR1 family||Zinc finger, PMZ-type||Zinc finger, SWIM-type||FAR1 DNA binding domain
VIT_13s0047g00500	vvi-miR482	-	Crotonase superfamily||ClpP/crotonase-like domain
VIT_13s0047g00770	vvi-miR845c,vvi-miR845a,vvi-miR845d	-	NAD(P)-binding domain
VIT_13s0047g01050	vvi-miR159c,vvi-miR319e,vvi-miR3632-3p,vvi-miR398a,vvi-miR2950-5p	-	Valyl/Leucyl/Isoleucyl-tRNA synthetase, class Ia, editing domain||Valyl/Leucyl/Isoleucyl-tRNA synthetase, class I, anticodon-binding||Rossmann-like alpha/beta/alpha sandwich fold||Aminoacyl-tRNA synthetase, class Ia||Valyl-tRNA synthetase, tRNA-binding arm||Valine-tRNA ligase||Aminoacyl-tRNA synthetase, class I, conserved site||tRNA-binding arm||Aminoacyl-tRNA synthetase, class 1a, anticodon-bind…
VIT_13s0047g01100	vvi-miR3629a-5p	-	Winged helix-turn-helix DNA-binding domain||Vacuolar protein sorting protein 36, GLUE domain||EAP30
VIT_13s0047g01140	vvi-miR396b	-	GPI inositol-deacylase PGAP1-like
VIT_13s0047g01200	vvi-miR3629a-5p,vvi-miR3629a-3p	-	Cytochrome P450||Cytochrome P450, conserved site||Cytochrome P450, E-class, group IV
VIT_13s0064g00010	vvi-miR3629a-3p	-	WD40/YVTN repeat-like-containing domain||WD40-repeat-containing domain||WD40 repeat||F-box domain, cyclin-like
VIT_13s0064g00360	vvi-miR394b	-	NLE||WD40/YVTN repeat-like-containing domain||WD40 repeat, conserved site||WD40 repeat||G-protein, beta subunit||G-protein beta WD-40 repeat||WD40-repeat-containing domain
VIT_13s0064g00550	vvi-miR3632-3p	-	P-loop containing nucleoside triphosphate hydrolase||NB-ARC
VIT_13s0064g00860	vvi-miR169v,vvi-miR169a,vvi-miR169m,vvi-miR169d,vvi-miR169x,vvi-miR169l,vvi-miR169e	-	CCAAT-binding factor, conserved site||CCAAT-binding transcription factor, subunit B
VIT_13s0064g00970	vvi-miR3629a-5p,vvi-miR156a	-	ATPase, F1 complex, OSCP/delta subunit||ATPase, F1 complex, OSCP/delta subunit, conserved site||F1F0 ATP synthase OSCP/delta subunit, N-terminal domain
VIT_13s0064g01150	vvi-miR3639-3p	-	WD40/YVTN repeat-like-containing domain||AT hook-like||WD40 repeat||WD40-repeat-containing domain||HMG-I/HMG-Y, DNA-binding, conserved site
VIT_13s0064g01230	vvi-miR3629a-5p	-	U6 snRNA-associated Sm-like protein LSm7||Ribonucleoprotein LSM domain||Like-Sm (LSM) domain||Ribonucleoprotein LSM domain, eukaryotic/archaea-type
VIT_13s0064g01350	vvi-miR3625-5p	-	Clustered mitochondria protein||Tetratricopeptide repeat||Tetratricopeptide repeat-containing domain||GSKIP/TIF31 domain||Tetratricopeptide-like helical||Protein of unknown function DUF727||CLU domain||Clustered mitochondria protein, N-terminal
VIT_13s0064g01570	vvi-miR3631a-5p,vvi-miR319b,vvi-miR319g	-	Glycoside hydrolase, catalytic domain||Glycoside hydrolase, family 1, active site||Glycoside hydrolase, superfamily||Glycoside hydrolase, family 1
VIT_13s0064g01600	vvi-miR3631a-5p	-	Glycoside hydrolase, catalytic domain||Glycoside hydrolase, superfamily||Glycoside hydrolase, family 1
VIT_13s0064g01690	vvi-miR319e,vvi-miR319g,vvi-miR3631a-5p,vvi-miR319b	-	Glycoside hydrolase, catalytic domain||Glycoside hydrolase, family 1||Glycoside hydrolase, superfamily
VIT_13s0067g00490	vvi-miR845c,vvi-miR845d	-	Leucine-rich repeat, typical subtype||Leucine-rich repeat||Protein kinase, ATP binding site||Serine/threonine- / dual specificity protein kinase, catalytic domain||Serine/threonine-protein kinase, active site||Concanavalin A-like lectin/glucanase, subgroup||Protein kinase, catalytic domain||Protein kinase-like domain
VIT_13s0067g00730	vvi-miR156b	-	Lipase, GDSL||SGNH hydrolase-type esterase domain
VIT_13s0067g00760	vvi-miR3632-3p	-	P-loop containing nucleoside triphosphate hydrolase||NB-ARC
VIT_13s0067g00780	vvi-miR3632-3p	-	NB-ARC||P-loop containing nucleoside triphosphate hydrolase
VIT_13s0067g00790	vvi-miR3632-3p	-	P-loop containing nucleoside triphosphate hydrolase||NB-ARC
VIT_13s0067g00830	vvi-miR3632-3p	-	NB-ARC||Sieve element occlusion, C-terminal||P-loop containing nucleoside triphosphate hydrolase
VIT_13s0067g01060	vvi-miR845a	-	SAC3/GANP/Nin1/mts3/eIF-3 p25
VIT_13s0067g01630	vvi-miR159a,vvi-miR319e,vvi-miR159c,vvi-miR319g	-	SANT/Myb domain||Myb domain||Homeodomain-like
VIT_13s0067g01710	vvi-miR828a	-	Translation initiation factor 2, alpha subunit, middle domain||Translation initiation factor 2, alpha subunit||Translation initiation factor 2, alpha subunit, C-terminal||RNA-binding domain, S1||Ribosomal protein S1, RNA-binding domain||Nucleic acid-binding, OB-fold
VIT_13s0067g01920	vvi-miR3629a-5p	-	Armadillo-type fold||Importin-beta, N-terminal
VIT_13s0067g01960	vvi-miR3629a-5p	-	DNA-binding, integrase-type||AP2/ERF domain
VIT_13s0067g02060	vvi-miR156e	-	Single hybrid motif||Biotin/lipoyl attachment
VIT_13s0067g02170	vvi-miR3629a-5p	-	Tetratricopeptide-like helical
VIT_13s0067g02210	vvi-miR3629a-5p	-	Tetratricopeptide repeat||Tetratricopeptide-like helical||NSF attachment protein
VIT_13s0067g02620	vvi-miR845a	-	SAC3/GANP/Nin1/mts3/eIF-3 p25
VIT_13s0067g02930	vvi-miR156a	-	Barwin-like endoglucanase||Expansin||Expansin, cellulose-binding-like domain||Barwin-related endoglucanase||Expansin/Lol pI||Expansin/pollen allergen, DPBB domain
VIT_13s0067g02970	vvi-miR3629a-3p	-	Domain of unknown function DUF250
VIT_13s0067g02980	vvi-miR3631a-5p	-	Multi antimicrobial extrusion protein
VIT_13s0067g03280	vvi-miR399i,vvi-miR399e,vvi-miR399a,vvi-miR399b	-	General substrate transporter||Phosphate permease||Major facilitator superfamily domain
VIT_13s0067g03330	novel_141	-	SNF2-related||Helicase, C-terminal||Helicase, superfamily 1/2, ATP-binding domain||Zinc finger, RING-type, conserved site||P-loop containing nucleoside triphosphate hydrolase||Zinc finger, CW-type||F-box domain, cyclin-like
VIT_13s0067g03410	vvi-miR156a,vvi-miR156b	-	Protein kinase-like domain||Protein kinase, ATP binding site||Concanavalin A-like lectin/glucanase, subgroup||Protein kinase, catalytic domain
VIT_13s0073g00130	vvi-miR159c	-	Pentatricopeptide repeat||Tetratricopeptide-like helical||Nucleotide-binding, alpha-beta plait||RNA recognition motif domain
VIT_13s0073g00440	vvi-miR2950-5p	-	Kelch-type beta propeller
VIT_13s0073g00560	vvi-miR3631a-5p	-	HSP40/DnaJ peptide-binding||Chaperone DnaJ||Chaperone DnaJ, C-terminal||Heat shock protein DnaJ, cysteine-rich domain||DnaJ domain, conserved site||DnaJ domain
VIT_13s0073g00690	vvi-miR156a	-	Glycosyl transferase, family 14
VIT_13s0074g00160	vvi-miR2950-5p	-	Uncharacterised conserved protein UCP012318||Ferritin/ribonucleotide reductase-like||Protein of unknown function DUF455
VIT_13s0074g00310	vvi-miR396b	-	Translation elongation factor EFTu/EF1A, domain 2||Translation initiation factor 2, gamma subunit, C-terminal||Translation elongation factor EF1A/initiation factor IF2gamma, C-terminal||P-loop containing nucleoside triphosphate hydrolase||Translation elongation/initiation factor/Ribosomal, beta-barrel||Elongation factor, GTP-binding domain
VIT_13s0074g00430	vvi-miR394b,vvi-miR3639-5p	-	Serine/threonine-protein kinase, active site||Serine/threonine- / dual specificity protein kinase, catalytic domain||Serine/threonine-protein kinase CTR1/EDR1||Protein kinase, ATP binding site||Protein kinase-like domain||Serine-threonine/tyrosine-protein kinase catalytic domain||Protein kinase, catalytic domain
VIT_13s0074g00440	vvi-miR3633a-5p	-	S-adenosyl-L-methionine-dependent methyltransferase-like
VIT_13s0074g00620	vvi-miR159c,vvi-miR319e,vvi-miR408	-	Kelch repeat type 1||Kelch-type beta propeller||Galactose oxidase, beta-propeller||Ribonuclease H-like domain
VIT_13s0084g00070	vvi-miR156a,vvi-miR3629a-5p	-	Cytochrome P450||Cytochrome P450, conserved site||Cytochrome P450, E-class, group I
VIT_13s0084g00090	novel_141	-	WAT1-related protein||Drug/metabolite transporter
VIT_13s0084g00170	vvi-miR3639-5p	-	RNA polymerase Rpb2, domain 3||DNA-directed RNA polymerase, subunit 2, domain 6||RNA polymerase, beta subunit, protrusion||RNA polymerase Rpb2, domain 5||DNA-directed RNA polymerase, subunit 2||RNA polymerase Rpb2, domain 2||RNA polymerase Rpb2, domain 4
VIT_13s0084g00180	vvi-miR319e,vvi-miR159c	-	RNA polymerase, beta subunit, conserved site||RNA polymerase Rpb2, domain 7||DNA-directed RNA polymerase, subunit 2, domain 6||DNA-directed RNA polymerase, subunit 2||RNA polymerase Rpb2, OB-fold
VIT_13s0084g00220	vvi-miR159c,vvi-miR319e	-	BRCT domain
VIT_13s0084g00520	vvi-miR845d,vvi-miR396b,vvi-miR159c,vvi-miR319e,vvi-miR396a	-	THO complex, subunit THOC1
VIT_13s0084g00580	vvi-miR3633a-5p	-	Zinc finger, GRF-type||Exonuclease, RNase T/DNA polymerase III||Ribonuclease H-like domain||Exonuclease
VIT_13s0084g00630	vvi-miR396b,vvi-miR396a	-	Munc13 homology 1||Mammalian uncoordinated homology 13, domain 2||Protein of unknown function DUF810
VIT_13s0101g00070	vvi-miR477b-5p	-	Heat shock protein 70, conserved site
VIT_13s0101g00360	vvi-miR2950-5p	-	Valyl/Leucyl/Isoleucyl-tRNA synthetase, class Ia, editing domain||Aminoacyl-tRNA synthetase, class 1a, anticodon-binding||Aminoacyl-tRNA synthetase, class Ia||Rossmann-like alpha/beta/alpha sandwich fold||Valine-tRNA ligase
VIT_13s0101g00380	vvi-miR3629a-5p,vvi-miR159a	-	Winged helix-turn-helix DNA-binding domain||EAP30
VIT_13s0106g00740	vvi-miR2950-5p,vvi-miR396a,vvi-miR396b	-	Putative sodium bile acid cotransporter
VIT_13s0106g00790	vvi-miR3629a-3p	-	Diphosphomevalonate decarboxylase||Ribosomal protein S5 domain 2-type fold||Ribosomal protein S5 domain 2-type fold, subgroup||GHMP kinase N-terminal domain||GHMP kinase, C-terminal domain
VIT_13s0139g00170	vvi-miR3629a-3p	-	Phosphoribosyltransferase domain||Orotate phosphoribosyltransferase||Ribulose-phosphate binding barrel||Orotidine 5'-phosphate decarboxylase||Phosphoribosyltransferase-like||Aldolase-type TIM barrel||Orotate phosphoribosyl transferase domain||Orotidine 5'-phosphate decarboxylase, active site||Orotidine 5'-phosphate decarboxylase domain
VIT_13s0139g00200	vvi-miR3629a-3p	-	Aldolase-type TIM barrel||Ribulose-phosphate binding barrel||Orotidine 5'-phosphate decarboxylase domain
VIT_13s0147g00110	vvi-miR3629a-5p	-	2Fe-2S ferredoxin-type domain||Ferredoxin [2Fe-2S], plant||2Fe-2S ferredoxin, iron-sulphur binding site||Beta-grasp domain
VIT_13s0147g00220	vvi-miR3629a-3p	-	ACT domain
VIT_13s0158g00050	vvi-miR477b-3p	-	Peptidase S10, serine carboxypeptidase||Peptidase S10, serine carboxypeptidase, active site||Alpha/Beta hydrolase fold
VIT_13s0158g00340	vvi-miR845a,vvi-miR845d,vvi-miR845c	-	Glycerol-3-phosphate dehydrogenase, NAD-dependent, C-terminal||6-phosphogluconate dehydrogenase, C-terminal-like||NAD(P)-binding domain||Glycerol-3-phosphate dehydrogenase, NAD-dependent, N-terminal||Glycerol-3-phosphate dehydrogenase, NAD-dependent||Dehydrogenase, multihelical
VIT_13s0158g00430	vvi-miR3639-5p	-	P-loop containing nucleoside triphosphate hydrolase||NB-ARC
VIT_13s0175g00120	vvi-miR397a	-	Basic-leucine zipper domain
VIT_14s0006g00430	vvi-miR845c,vvi-miR845d	-	Alpha/Beta hydrolase fold||Alpha/beta hydrolase fold-3
VIT_14s0006g01020	vvi-miR3638-5p	-	RNA recognition motif domain||Nucleotide-binding, alpha-beta plait||Friend of PRMT1 duplication
VIT_14s0006g01250	vvi-miR397a	-	C2 calcium-dependent membrane targeting
VIT_14s0006g01440	vvi-miR3629a-5p	-	Double-stranded RNA-binding protein||Double-stranded RNA-binding domain
VIT_14s0006g01730	vvi-miR845a,vvi-miR845d,vvi-miR845c	-	Tafazzin
VIT_14s0006g02280	vvi-miR396a,vvi-miR396b	-	Protein kinase, catalytic domain||Protein kinase-like domain||Protein kinase, ATP binding site||Serine/threonine- / dual specificity protein kinase, catalytic domain||Serine/threonine-protein kinase, active site
VIT_14s0006g03040	vvi-miR3630-5p	-	Ubiquitin||Ubiquitin-associated/translation elongation factor EF1B, N-terminal, eukaryote||UV excision repair protein Rad23||Heat shock chaperonin-binding||XPC-binding domain||Ubiquitin-associated/translation elongation factor EF1B, N-terminal||Ubiquitin-related domain||UBA-like
VIT_14s0006g03070	vvi-miR319e,vvi-miR845c	-	Flavoprotein-like||NADPH-dependent diflavin oxidoreductase 1||NADPH-cytochrome p450 reductase, FAD-binding, alpha-helical domain-3||Flavodoxin||Ferredoxin reductase-type FAD-binding domain||Riboflavin synthase-like beta-barrel||Flavodoxin/nitric oxide synthase||FAD-binding, type 1||Flavoprotein pyridine nucleotide cytochrome reductase||Oxidoreductase FAD/NAD(P)-binding
VIT_14s0006g03210	vvi-miR3629a-3p	-	Cytochrome c oxidase biogenesis protein Cmc1-like
VIT_14s0030g00220	vvi-miR169d,vvi-miR3635-3p	-	General substrate transporter||Sugar/inositol transporter||Major facilitator superfamily domain||Sugar transporter, conserved site
VIT_14s0030g00260	vvi-miR3629a-3p	-	General substrate transporter||Sugar transporter, conserved site||Major facilitator superfamily domain
VIT_14s0030g00290	vvi-miR3631b-3p	-	Major facilitator superfamily domain
VIT_14s0030g00620	vvi-miR3629a-5p	-	Development/cell death domain
VIT_14s0030g00630	vvi-miR159a	-	Ribosomal protein L18/L5
VIT_14s0030g00960	vvi-miR156a	-	P-loop containing nucleoside triphosphate hydrolase||Leucine-rich repeat||NB-ARC
VIT_14s0030g01160	vvi-miR156a	-	P-loop containing nucleoside triphosphate hydrolase||Leucine-rich repeat||NB-ARC||AAA+ ATPase domain
VIT_14s0030g01240	vvi-miR393b	-	Leucine-rich repeat, cysteine-containing subtype||F-box domain, cyclin-like
VIT_14s0030g01280	vvi-miR3629a-5p	-	Double-stranded RNA-binding domain||Double-stranded RNA-binding protein
VIT_14s0030g01340	vvi-miR3629a-3p	-	Alpha/Beta hydrolase fold||Alpha/beta hydrolase fold-1||Diacylglycerol acyltransferase
VIT_14s0030g01530	vvi-miR845d,vvi-miR2950-5p,vvi-miR172c	-	Armadillo-like helical||Armadillo-type fold||Monensin-resistant homologue 2
VIT_14s0030g01580	vvi-miR319e,vvi-miR159c	-	Zinc finger, CCHC-type||5'-3' exoribonuclease||Putative 5-3 exonuclease
VIT_14s0030g01870	novel_141	-	Protein kinase, catalytic domain||Serine/threonine- / dual specificity protein kinase, catalytic domain||Serine/threonine-protein kinase, active site||Protein kinase-like domain||Protein kinase, ATP binding site
VIT_14s0030g02010	vvi-miR396b,vvi-miR845c,vvi-miR845d,vvi-miR845a	-	NADP-dependent oxidoreductase domain||Aldo/keto reductase
VIT_14s0030g02170	vvi-miR3629a-5p	-	Calcium-binding EF-hand||EF-hand-like domain
VIT_14s0036g00330	vvi-miR3629a-3p	-	NB-ARC||P-loop containing nucleoside triphosphate hydrolase
VIT_14s0036g00420	vvi-miR3629a-3p	-	Protein kinase, catalytic domain||Protein kinase, ATP binding site||Protein kinase-like domain||Serine/threonine-protein kinase, active site||Serine/threonine- / dual specificity protein kinase, catalytic domain
VIT_14s0036g00630	vvi-miR845c,vvi-miR845d	-	RNA recognition motif domain||Nucleotide-binding, alpha-beta plait
VIT_14s0036g00660	vvi-miR396b,vvi-miR159c,vvi-miR319e,vvi-miR2950-5p	-	CRM1 C-terminal domain||Armadillo-type fold||Armadillo-like helical
VIT_14s0036g00840	vvi-miR159c	-	DUF71 domain||Rossmann-like alpha/beta/alpha sandwich fold||Diphthine--ammonia ligase/Uncharacterised protein MJ0570
VIT_14s0036g00850	vvi-miR394b	-	YjgF/Yer057p/UK114 family||Rossmann-like alpha/beta/alpha sandwich fold||DUF71 domain||Reverse transcriptase, RNA-dependent DNA polymerase||Endoribonuclease L-PSP/chorismate mutase-like||Diphthine--ammonia ligase/Uncharacterised protein MJ0570
VIT_14s0036g00980	vvi-miR169d	-	Transcription initiation factor TFIID, 23-30kDa subunit
VIT_14s0036g01520	novel_141	-	Anticodon-binding||Brix domain
VIT_14s0060g00320	vvi-miR3631a-3p,vvi-miR3631b-3p	-	Zinc finger, C2H2||G-patch domain
VIT_14s0060g00470	vvi-miR171b,vvi-miR169v,vvi-miR171h	-	AAA+ ATPase domain||ABC-transporter extracellular N-terminal domain||ABC transporter-like||P-loop containing nucleoside triphosphate hydrolase||ABC-2 type transporter||Plant PDR ABC transporter associated
VIT_14s0060g00580	vvi-miR3629a-5p	-	FACT complex subunit Spt16, N-terminal lobe domain||Domain of unknown function DUF1747||Peptidase M24, structural domain||Creatinase/Aminopeptidase P/Spt16, N-terminal||FACT complex subunit Spt16p/Cdc68p
VIT_14s0060g00800	vvi-miR3631a-3p	-	Glycosyl transferase, family 8||Nucleotide-diphospho-sugar transferases||Galactinol synthase
VIT_14s0060g01120	vvi-miR3629a-5p	-	Pentatricopeptide repeat||Tetratricopeptide-like helical
VIT_14s0060g01140	novel_141	-	INO80 complex, subunit Ies2||Zinc finger, HIT-type||PAPA-1-like conserved region
VIT_14s0060g01430	vvi-miR3629a-3p	-	Domain of unknown function DUF4378
VIT_14s0060g01580	vvi-miR3629a-3p,vvi-miR3629a-5p	-	Protein phosphatase 2C (PP2C)-like||Protein phosphatase 2C
VIT_14s0060g01670	vvi-miR3636-3p	-	Xyloglucan endo-transglycosylase, C-terminal||Concanavalin A-like lectin/glucanase, subgroup||Glycoside hydrolase, family 16
VIT_14s0060g01750	vvi-miR3629a-5p	-	Serine/threonine-specific protein phosphatase/bis(5-nucleosyl)-tetraphosphatase||Metallophosphoesterase domain||Metallo-dependent phosphatase-like
VIT_14s0060g01970	vvi-miR3629a-5p	-	Leucine-rich repeat, cysteine-containing subtype
VIT_14s0060g01980	vvi-miR3629a-5p	-	Protein of unknown function DUF1399
VIT_14s0060g02080	vvi-miR845c	-	Lipase, GDSL||SGNH hydrolase-type esterase domain
VIT_14s0060g02370	novel_141	-	Peptidase S1C||Trypsin-like cysteine/serine peptidase domain||PDZ domain
VIT_14s0066g00790	novel_141	-	Nucleotide-binding, alpha-beta plait||Zinc finger, CCCH-type||RNA recognition motif domain
VIT_14s0066g01220	vvi-miR828a	-	Homeodomain-like||SANT/Myb domain||Myb domain
VIT_14s0066g01660	vvi-miR156a	-	PDZ domain||Trypsin-like cysteine/serine peptidase domain||Peptidase S1||Peptidase S1C
VIT_14s0068g00410	vvi-miR3629a-5p	-	NLE||WD40 repeat, conserved site||WD40/YVTN repeat-like-containing domain||WD repeat WDR12/Ytm1||G-protein beta WD-40 repeat||WD40-repeat-containing domain||WD40 repeat
VIT_14s0068g00420	vvi-miR477b-5p,vvi-miR159c,vvi-miR319e	-	Alpha-amylase, C-terminal beta-sheet||Glycoside hydrolase, catalytic domain||Glycoside hydrolase, family 13||Glycosyl hydrolase, family 13, catalytic domain||Glycoside hydrolase, superfamily||Glycosyl hydrolase, family 13, all-beta||Glycosyl hydrolase, family 13, subfamily, catalytic domain
VIT_14s0068g00630	vvi-miR167b,vvi-miR167c	-	Armadillo-like helical||Armadillo-type fold||Exportin-1/Importin-beta-like
VIT_14s0068g00870	novel_141	-	NUDIX hydrolase domain||NUDIX hydrolase, conserved site||NUDIX hydrolase domain-like
VIT_14s0068g01030	vvi-miR3625-5p	-	Rieske iron-sulphur protein||Rieske [2Fe-2S] iron-sulphur domain||Ubiquinol cytochrome reductase, transmembrane domain||Ubiquinol-cytochrome c reductase, iron-sulphur subunit||Rieske iron-sulphur protein, C-terminal
VIT_14s0068g01330	vvi-miR393b	-	Leucine-rich repeat, cysteine-containing subtype||F-box domain, cyclin-like
VIT_14s0068g01390	vvi-miR3629a-5p	-	BRO1 domain
VIT_14s0068g01440	vvi-miR3625-5p	-	Diacylglycerol acyltransferase||Alpha/beta hydrolase fold-1||Alpha/Beta hydrolase fold
VIT_14s0068g01780	vvi-miR156b,vvi-miR156e,vvi-miR156f,vvi-miR156a	-	Transcription factor, SBP-box
VIT_14s0068g01840	vvi-miR169a	-	Protein of unknown function DUF3339
VIT_14s0068g02130	novel_141	-	AAA+ ATPase domain||P-loop containing nucleoside triphosphate hydrolase||ATPase, AAA-type, core||Vps4 oligomerisation, C-terminal||ATPase, AAA-type, conserved site
VIT_14s0068g02150	vvi-miR2111-5p	-	Kelch repeat type 1||Galactose oxidase, beta-propeller
VIT_14s0081g00240	novel_141	-	ATP-grasp fold, subdomain 2||ATP-grasp fold, subdomain 1||Phosphoribosylaminoimidazole carboxylase, ATPase subunit||N5-carboxyaminoimidazole ribonucleotide mutase PurE domain||Phosphoribosylaminoimidazole carboxylase||ATP-grasp fold||ATP-grasp fold, ATP-dependent carboxylate-amine ligase-type||Pre-ATP-grasp domain||Rudiment single hybrid motif
VIT_14s0081g00320	vvi-miR3629a-5p	-	Zein-binding domain
VIT_14s0081g00580	vvi-miR3639-5p	-	Peptidase C13, legumain||GPI-anchor transamidase
VIT_14s0081g00600	novel_141	-	Associate of Myc 1
VIT_14s0083g00040	vvi-miR845a	-	Sugar/inositol transporter||General substrate transporter||Major facilitator superfamily domain||Sugar transporter, conserved site
VIT_14s0083g00440	novel_141	-	BRCT domain||Zinc finger, RING-type||Zinc finger, RING-type, conserved site||Zinc finger, FYVE/PHD-type||Zinc finger, RING/FYVE/PHD-type
VIT_14s0083g00630	vvi-miR3629a-3p	-	FBD||F-box domain, cyclin-like
VIT_14s0083g00750	vvi-miR319e,vvi-miR159c	-	Armadillo-like helical||Armadillo-type fold||Cell morphogenesis protein N-terminal||Cell morphogenesis central region||Cell morphogenesis protein C-terminal
VIT_14s0083g01170	vvi-miR3626-3p	-	Mitochondrial substrate/solute carrier||Mitochondrial carrier domain
VIT_14s0108g00050	vvi-miR2111-3p	-	DNA-binding, integrase-type||AP2/ERF domain||AP2-like ethylene-responsive transcription factor
VIT_14s0108g01070	vvi-miR164a	-	No apical meristem (NAM) protein
VIT_14s0108g01390	novel_141	-	U box domain||Ubiquitin conjugation factor E4, core||Zinc finger, RING/FYVE/PHD-type
VIT_14s0108g01660	novel_141	-	Biotin-binding site||Acetyl-CoA biotin carboxyl carrier||Single hybrid motif||Biotin/lipoyl attachment
VIT_14s0128g00190	novel_141	-	Heavy metal-associated domain, HMA
VIT_14s0128g00220	vvi-miR845d	-	Signal peptidase 22kDa subunit
VIT_14s0128g00230	vvi-miR3629a-3p	-	Myb/SANT-like domain
VIT_14s0128g00400	vvi-miR3629a-5p	-	Mitochondrial Rho-like||EF hand associated, type-1||MIRO||Small GTPase superfamily, mitochondrial rho type||EF-Hand 1, calcium-binding site||EF-hand-like domain||EF hand associated, type-2||P-loop containing nucleoside triphosphate hydrolase||Small GTPase superfamily, Ras type||Small GTPase superfamily, Rab type||Small GTPase superfamily||Small GTPase superfamily, Rho type||Calcium-binding EF-hand
VIT_14s0128g00520	vvi-miR159a	-	Lipase, GDSL||SGNH hydrolase-type esterase domain
VIT_14s0171g00260	vvi-miR3626-3p,vvi-miR3629a-3p	-	Phosducin, thioredoxin-like domain||Thioredoxin-like fold
VIT_14s0171g00490	vvi-miR3629a-3p	-	Glucose-6-phosphate dehydrogenase||NAD(P)-binding domain||Glucose-6-phosphate dehydrogenase, C-terminal||Glucose-6-phosphate dehydrogenase, active site||Glucose-6-phosphate dehydrogenase, NAD-binding
VIT_14s0219g00120	vvi-miR169d	-	Cystinosin/ERS1p repeat||Lysosomal cystine transporter
VIT_14s0219g00130	vvi-miR169b	-	Cystinosin/ERS1p repeat||Lysosomal cystine transporter
VIT_14s0219g00170	vvi-miR156b	-	Zinc finger, CCCH-type
VIT_14s0219g00280	novel_141	-	Glycerol-3-phosphate dehydrogenase, NAD-dependent, N-terminal||NAD(P)-binding domain||6-phosphogluconate dehydrogenase, C-terminal-like||Glycerol-3-phosphate dehydrogenase, NAD-dependent, C-terminal||Glycerol-3-phosphate dehydrogenase, NAD-dependent, eukaryotic||Dehydrogenase, multihelical||Glycerol-3-phosphate dehydrogenase, NAD-dependent
VIT_15s0021g00040	vvi-miR845c,vvi-miR845a,vvi-miR845d	-	Uncharacterised domain Wax2, C-terminal||Fatty acid hydroxylase
VIT_15s0021g00090	vvi-miR3629a-5p	-	Sister chromatid cohesion protein Dcc1
VIT_15s0021g00650	vvi-miR3631a-5p,vvi-miR3631a-3p,vvi-miR3631b-3p	-	Purine permease, plant||Domain of unknown function DUF250
VIT_15s0021g00990	vvi-miR159c,vvi-miR319e	-	Zinc finger, LSD1-type||Caspase-like domain||Peptidase C14, caspase catalytic
VIT_15s0021g01010	vvi-miR3631a-3p	-	MORN motif
VIT_15s0021g01380	vvi-miR159c	-	Protein kinase, catalytic domain||Serine/threonine-protein kinase, active site||Serine/threonine- / dual specificity protein kinase, catalytic domain||Protein kinase-like domain
VIT_15s0021g01390	vvi-miR408	-	Plastocyanin-like||Cupredoxin
VIT_15s0021g01560	vvi-miR845a	-	S-adenosyl-L-methionine-dependent methyltransferase-like||Leucine carboxyl methyltransferase||Leucine carboxyl methyltransferase, LCTM1 1
VIT_15s0021g01810	vvi-miR3632-3p	-	Armadillo||F-box domain, cyclin-like||Armadillo-type fold||Armadillo-like helical
VIT_15s0021g01850	vvi-miR845d	-	Protein-tyrosine phosphatase-like||Protein-tyrosine/Dual specificity phosphatase||Protein-tyrosine phosphatase, active site||Dual specificity phosphatase, subgroup, catalytic domain||Peptidyl-prolyl cis-trans isomerase, FKBP-type||Peptidyl-prolyl cis-trans isomerase, FKBP-type, domain||Dual specificity phosphatase, catalytic domain
VIT_15s0021g01870	vvi-miR3629a-3p	-	ARP2/3 complex, 16kDa subunit (p16-Arc)
VIT_15s0021g01940	vvi-miR3629a-5p	-	K Homology domain, type 1||K Homology domain
VIT_15s0021g02000	novel_141	-	Protein of unknown function DUF1639
VIT_15s0021g02090	vvi-miR3624-3p	-	Chaperone DnaJ, C-terminal||HSP40/DnaJ peptide-binding||Chaperone DnaJ||DnaJ domain, conserved site||DnaJ domain||Heat shock protein DnaJ, cysteine-rich domain
VIT_15s0021g02280	vvi-miR156b	-	Peptidase M10A||Metallopeptidase, catalytic domain||Peptidase, metallopeptidase||Peptidoglycan binding-like||Peptidase M10, metallopeptidase
VIT_15s0021g02290	vvi-miR156a,vvi-miR156e,vvi-miR156f,vvi-miR156b	-	Transcription factor, SBP-box
VIT_15s0021g02580	vvi-miR3640-5p,vvi-miR396a,vvi-miR396b	-	CCR4-Not complex, Not1 subunit, domain of unknown function DUF3819
VIT_15s0024g00160	novel_141	-	Vacuolar protein sorting-associated protein 13
VIT_15s0024g00480	vvi-miR845a	-	Phloem protein 2-like
VIT_15s0024g00820	vvi-miR3629a-5p	-	Protein of unknown function DUF1005
VIT_15s0045g00540	vvi-miR319b,vvi-miR394b	-	von Willebrand factor, type A||Gelsolin domain||Zinc finger, Sec23/Sec24-type||ADF-H/Gelsolin-like domain||Sec23/Sec24 beta-sandwich||Sec23/Sec24, helical domain||Sec23/Sec24, trunk domain
VIT_15s0045g01110	vvi-miR159c	-	Initiation factor eIF-4 gamma, MA3||MIF4G-like, type 3||Armadillo-type fold||MIF4-like, type 1/2/3
VIT_15s0045g01170	vvi-miR845c	-	Crotonase superfamily||ClpP/crotonase-like domain
VIT_15s0045g01190	vvi-miR395a	-	ClpP/crotonase-like domain
VIT_15s0045g01250	vvi-miR319e,vvi-miR396a,vvi-miR396b,vvi-miR159c,vvi-miR394b	-	Nucleotide-diphospho-sugar transferases||Armadillo-type fold||MIF4-like, type 1/2/3||Nucleotidyl transferase||Bacterial transferase hexapeptide repeat||Trimeric LpxA-like||W2 domain
VIT_15s0045g01340	vvi-miR156a	-	Ribosomal protein L18/L5
VIT_15s0046g00340	vvi-miR319b	-	JmjC domain||WRC||Zinc finger, RING-type
VIT_15s0046g00390	novel_141	-	TRAF-like||SIAH-type domain||Zinc finger, RING-type||Seven-in-absentia protein, TRAF-like domain||Zinc finger, RING/FYVE/PHD-type||Zinc finger, SIAH-type||E3 ubiquitin-protein ligase SINA like
VIT_15s0046g00470	vvi-miR3629a-5p	-	P-loop containing nucleoside triphosphate hydrolase||Dynamin, GTPase domain||Dynamin, GTPase region, conserved site||Dynamin||Dynamin-type guanine nucleotide-binding (G) domain||Dynamin GTPase effector||GTPase effector domain, GED||Dynamin central domain
VIT_15s0046g00860	vvi-miR845c	-	F-box domain, cyclin-like
VIT_15s0046g00970	novel_141	-	Plant lipid transfer protein/Par allergen||Bifunctional inhibitor/plant lipid transfer protein/seed storage helical domain
VIT_15s0046g01080	vvi-miR3629a-5p	-	Glycoside hydrolase, superfamily||Chitinase II||Glycoside hydrolase, family 18, catalytic domain||Glycoside hydrolase, catalytic domain
VIT_15s0046g01230	vvi-miR156f	-	PMR5 N-terminal domain||Protein trichome birefringence-like 23-26||Trichome birefringence-like family||PC-Esterase
VIT_15s0046g01370	vvi-miR166a	-	Mitochondrial carrier protein||Mitochondrial substrate/solute carrier||Mitochondrial carrier domain
VIT_15s0046g01660	vvi-miR3629a-3p	-	Protein of unknown function DUF2358
VIT_15s0046g01770	vvi-miR3629a-5p	-	Diacylglycerol kinase, catalytic domain||Diacylglycerol/lipid kinase||ATP-NAD kinase-like domain
VIT_15s0046g01780	vvi-miR3629a-5p	-	Ribosomal protein L5, bacterial-type||Ribosomal protein L5||Ribosomal protein L5 domain||Ribosomal protein L5, conserved site
VIT_15s0046g01790	novel_141	-	ARID/BRIGHT DNA-binding domain
VIT_15s0046g01840	vvi-miR2111-5p	-	EGF-like, conserved site||Protein of unknown function DUF3522
VIT_15s0046g02050	vvi-miR3636-3p	-	Protein of unknown function DUF2358
VIT_15s0046g02330	vvi-miR156e	-	HAD-like domain
VIT_15s0046g02440	vvi-miR169r	-	Transcription factor TFIIB||Cyclin-like
VIT_15s0046g02510	vvi-miR156f	-	Mediator complex, subunit Med12
VIT_15s0046g02600	vvi-miR3631b-3p	-	Domain of unknown function DUF4409||Domain of unknown function DUF239
VIT_15s0046g02610	vvi-miR3631b-3p,vvi-miR3631a-5p,vvi-miR3631a-3p	-	Domain of unknown function DUF4409||Domain of unknown function DUF239
VIT_15s0046g03070	vvi-miR167b	-	Lipopolysaccharide-modifying protein
VIT_15s0046g03120	vvi-miR167b	-	Lipopolysaccharide-modifying protein
VIT_15s0046g03360	vvi-miR3631b-3p	-	Protein of unknown function DUF1446
VIT_15s0046g03410	vvi-miR3629a-3p	-	Nucleophile aminohydrolases, N-terminal||Peptidase T2, asparaginase 2
VIT_15s0048g00270	vvi-miR171h,vvi-miR171e,vvi-miR171f,vvi-miR171b,vvi-miR171a	-	Transcription factor GRAS
VIT_15s0048g00530	vvi-miR156b,vvi-miR156e	-	Auxin responsive SAUR protein
VIT_15s0048g00600	vvi-miR3629a-5p	-	Major sperm protein||Vesicle-associated membrane protein||PapD-like
VIT_15s0048g00960	vvi-miR3631b-3p	-	WD40 repeat||WD40-repeat-containing domain||WD40/YVTN repeat-like-containing domain||WD40 repeat, conserved site
VIT_15s0048g01320	vvi-miR3639-3p	-	Oxoglutarate/iron-dependent dioxygenase||Isopenicillin N synthase-like||Non-haem dioxygenase N-terminal domain||Isopenicillin N synthase
VIT_15s0048g01340	vvi-miR3631a-5p	-	PAP/25A-associated
VIT_15s0048g01410	vvi-miR394b	-	Calcium-dependent lipid-binding transcriptional regulator, plant||C2 calcium-dependent membrane targeting
VIT_15s0048g01430	vvi-miR845a,vvi-miR845d,vvi-miR845c	-	Sterol methyltransferase C-terminal||S-adenosyl-L-methionine-dependent methyltransferase-like
VIT_15s0048g01830	vvi-miR3629a-3p	-	Pentatricopeptide repeat||Tetratricopeptide-like helical
VIT_15s0048g02000	novel_141	-	Homeodomain-like||Homeobox, conserved site||Homeodomain||START domain
VIT_15s0048g02150	vvi-miR3632-3p	-	Winged helix-turn-helix DNA-binding domain||Peptidase M24, structural domain||Peptidase M24, methionine aminopeptidase||Peptidase M24A, methionine aminopeptidase, subfamily 2||Peptidase M24A, methionine aminopeptidase, subfamily 2, binding site
VIT_15s0048g02230	vvi-miR395a	-	Metallo-dependent phosphatase-like||Metallophosphoesterase domain||Phosphoesterase At2g46880
VIT_15s0048g02560	vvi-miR3629a-5p	-	RNA recognition motif domain||Nucleotide-binding, alpha-beta plait
VIT_15s0107g00120	vvi-miR477b-5p,novel_141	-	Transcription factor, MADS-box||Transcription factor, K-box
VIT_15s0107g00310	vvi-miR167b,vvi-miR167a,vvi-miR167c	-	Calcium-binding EF-hand||EF-hand-like domain
VIT_15s0107g00350	vvi-miR845a,vvi-miR845c	-	Diacylglycerol kinase, accessory domain
VIT_15s0107g00410	vvi-miR169d	-	Reverse transcriptase, RNA-dependent DNA polymerase||Domain of unknown function DUF1336||START-like domain||START domain
VIT_15s0107g00450	vvi-miR156e	-	AMP-dependent synthetase/ligase||AMP-binding, conserved site
VIT_16s0013g00490	vvi-miR319e,vvi-miR159c	-	Structural maintenance of chromosomes protein 6||SMCs flexible hinge||P-loop containing nucleoside triphosphate hydrolase||RecF/RecN/SMC
VIT_16s0013g01430	vvi-miR159c	-	Armadillo-type fold||Armadillo-like helical||F-box domain, cyclin-like||Armadillo
VIT_16s0013g01520	vvi-miR3629a-3p	-	U3 small nucleolar RNA-associated protein 10||Armadillo-like helical||Armadillo-type fold
VIT_16s0013g01680	vvi-miR3629a-3p	-	Peptidase T2, asparaginase 2||Nucleophile aminohydrolases, N-terminal
VIT_16s0013g01750	vvi-miR169x,novel_141	-	Diacylglycerol kinase, catalytic domain||ATP-NAD kinase-like domain
VIT_16s0013g02000	vvi-miR395a	-	RFT1
VIT_16s0013g02100	vvi-miR396a,vvi-miR396b	-	P-loop containing nucleoside triphosphate hydrolase||Cellulose synthase
VIT_16s0022g00640	vvi-miR3640-3p,vvi-miR3640-5p	-	IQ motif, EF-hand binding site
VIT_16s0022g00980	vvi-miR3633a-5p	-	UMP-CMP kinase||Adenylate kinase||P-loop containing nucleoside triphosphate hydrolase
VIT_16s0022g01820	vvi-miR3629a-5p	-	Microtubule-associated protein, MAP65/Ase1/PRC1
VIT_16s0022g01870	novel_141	-	Protein of unknown function DUF668||Protein of unknown function DUF3475
VIT_16s0022g02150	vvi-miR162	-	Cytochrome P450, E-class, group I||Cytochrome P450
VIT_16s0039g00520	vvi-miR845d	-	AAA+ ATPase domain||Helicase, superfamily 1/2, ATP-binding domain||P-loop containing nucleoside triphosphate hydrolase
VIT_16s0039g00570	vvi-miR408	-	Chloramphenicol acetyltransferase-like domain||Transferase
VIT_16s0039g00970	vvi-miR172a,vvi-miR172b	-	Glutathione S-transferase, C-terminal||Glutathione S-transferase, N-terminal||Glutathione S-transferase, C-terminal-like||Thioredoxin-like fold
VIT_16s0039g00990	vvi-miR172a	-	Glutathione S-transferase, C-terminal||Thioredoxin-like fold||Glutathione S-transferase, N-terminal||Glutathione S-transferase, C-terminal-like
VIT_16s0039g01030	vvi-miR156a	-	Glycosyl hydrolases family 31, conserved site||Galactose mutarotase-like domain||Glycoside hydrolase family 31, N-terminal domain||WD40 repeat, conserved site||WD40/YVTN repeat-like-containing domain||Glycosyl hydrolases family 31, active site||WD40-repeat-containing domain||WD40 repeat||Glycoside hydrolase, family 31||Glycoside hydrolase, superfamily
VIT_16s0039g01390	vvi-miR3629a-5p	-	Alanyl-tRNA synthetase, class IIc, N-terminal||Alanine-tRNA ligase, class IIc||Alanyl-tRNA synthetase, class IIc, core domain||Alanine-tRNA ligase, class IIc, anti-codon-binding domain||Threonyl/alanyl tRNA synthetase, SAD||Alanine-tRNA ligase, eukaryota/bacteria||Translation elongation/initiation factor/Ribosomal, beta-barrel||Threonyl/alanyl tRNA synthetase, class II-like, putative editing doma…
VIT_16s0039g01420	vvi-miR3629a-3p	-	Nucleotide-diphospho-sugar transferases
VIT_16s0039g01430	vvi-miR156b,vvi-miR156e	-	Origin recognition complex, subunit 3
VIT_16s0039g01610	vvi-miR3629a-5p	-	Armadillo-like helical||Armadillo-type fold||Armadillo||ATPase, V1 complex, subunit H, C-terminal||ATPase, V1 complex, subunit H
VIT_16s0039g01750	vvi-miR3633a-5p	-	Myb domain||SANT/Myb domain||Myb-like domain||Homeodomain-like
VIT_16s0039g02000	vvi-miR156a,vvi-miR156f	-	Peptidyl-tRNA hydrolase II domain||Peptidyl-tRNA hydrolase, PTH2
VIT_16s0039g02120	vvi-miR3629a-5p	-	Zinc finger, CHCC-type
VIT_16s0039g02150	vvi-miR394b	-	P-loop containing nucleoside triphosphate hydrolase
VIT_16s0039g02170	vvi-miR3629a-5p	-	Major facilitator superfamily domain||Sugar transporter, conserved site||Sugar/inositol transporter||General substrate transporter
VIT_16s0039g02260	vvi-miR164a	-	HD/PDEase domain||RelA/SpoT||Beta-grasp domain||TGS
VIT_16s0039g02270	vvi-miR3629a-5p	-	Protein phosphatase 4 core regulatory subunit R2
VIT_16s0039g02470	vvi-miR3629a-3p,vvi-miR3629a-5p	-	S-adenosyl-L-methionine-dependent methyltransferase-like||Bromo adjacent homology (BAH) domain
VIT_16s0039g02640	vvi-miR3629a-5p	-	5'-3' exoribonuclease||Putative 5-3 exonuclease
VIT_16s0050g00060	vvi-miR3629a-5p	-	Longin domain||Longin-like domain
VIT_16s0050g00180	vvi-miR156f	-	Leucine-rich repeat-containing N-terminal, type 2||Leucine-rich repeat, typical subtype||Leucine-rich repeat
VIT_16s0050g00200	vvi-miR156f	-	Leucine-rich repeat, typical subtype||Leucine rich repeat 4||Leucine-rich repeat||Leucine-rich repeat-containing N-terminal, type 2
VIT_16s0050g00410	vvi-miR3631a-3p,vvi-miR3631b-3p	-	PAR1
VIT_16s0050g00600	vvi-miR3629a-5p	-	S-layer homology domain
VIT_16s0050g01190	vvi-miR3629a-3p	-	Heavy metal-associated domain, HMA
VIT_16s0050g01230	vvi-miR3629a-3p	-	Heavy metal-associated domain, HMA
VIT_16s0050g01440	vvi-miR3629a-5p	-	FMN-binding split barrel
VIT_16s0050g01490	vvi-miR3629a-3p,vvi-miR3626-3p	-	ETC complex I subunit
VIT_16s0050g01790	vvi-miR3629a-3p	-	Reticulon
VIT_16s0050g01830	vvi-miR845d	-	ATPase, AAA-type, conserved site||ATPase, AAA-type, core||P-loop containing nucleoside triphosphate hydrolase||AAA+ ATPase domain
VIT_16s0050g01870	vvi-miR3626-3p	-	CAAX amino terminal protease
VIT_16s0050g02000	vvi-miR477a	-	WD40 repeat, conserved site||WD40/YVTN repeat-like-containing domain||WD40-repeat-containing domain||WD40 repeat
VIT_16s0050g02240	vvi-miR393b,vvi-miR3629a-5p	-	Domain of unknown function DUF4308
VIT_16s0050g02420	vvi-miR3629a-5p	-	Myosin tail 2
VIT_16s0050g02440	vvi-miR3629a-5p	-	Zinc finger, BED-type predicted||HAT dimerisation||Ribonuclease H-like domain||Domain of unknown function DUF659
VIT_16s0050g02460	vvi-miR477b-5p	-	Domain of unknown function DUF4094||Glycosyl transferase, family 31
VIT_16s0050g02710	vvi-miR3626-5p	-	Wall-associated receptor kinase galacturonan-binding domain
VIT_16s0098g00430	vvi-miR395a	-	Protein kinase-like domain||Protein kinase, catalytic domain||Protein kinase, ATP binding site||Leucine-rich repeat-containing N-terminal, type 2||Serine/threonine- / dual specificity protein kinase, catalytic domain||Serine/threonine-protein kinase, active site||Leucine-rich repeat, typical subtype||Leucine rich repeat 4||Leucine-rich repeat
VIT_16s0098g00520	vvi-miR845c,vvi-miR845d	-	Gag-polypeptide of LTR copia-type
VIT_16s0098g00680	vvi-miR169v	-	DNA mismatch repair protein MutS, type 2||DNA mismatch repair protein MutS, C-terminal||DNA mismatch repair protein MutS, core||P-loop containing nucleoside triphosphate hydrolase
VIT_16s0098g00970	vvi-miR3630-3p	-	Peptidase S8/S53 domain||Mitochodrial transcription termination factor-related||Proteinase inhibitor I9||Protease-associated domain, PA||Peptidase S8, subtilisin, Ser-active site||Peptidase S8, subtilisin-related
VIT_16s0098g01010	novel_141	-	Ribosomal protein L12 family
VIT_16s0098g01040	vvi-miR3629a-5p	-	Nucleotide-binding, alpha-beta plait||Ataxin-2, C-terminal||RNA recognition motif domain
VIT_16s0098g01090	vvi-miR390	-	Protein kinase-like domain||Protein kinase, ATP binding site||Leucine-rich repeat||Protein kinase, catalytic domain||Concanavalin A-like lectin/glucanase, subgroup||Leucine-rich repeat, typical subtype
VIT_16s0098g01140	novel_141	-	EF-hand-like domain||Protein kinase, catalytic domain||Serine/threonine- / dual specificity protein kinase, catalytic domain||Serine/threonine-protein kinase, active site||Protein kinase-like domain||Protein kinase, ATP binding site
VIT_16s0098g01300	vvi-miR3629a-3p	-	F-box domain, cyclin-like
VIT_16s0098g01880	vvi-miR162,vvi-miR3629a-3p	-	Peptidase S9B, dipeptidylpeptidase IV N-terminal||Peptidase S9, prolyl oligopeptidase, catalytic domain||Alpha/Beta hydrolase fold
VIT_16s0100g00360	vvi-miR3629a-5p	-	Per1-like
VIT_16s0100g00370	vvi-miR159c,vvi-miR319e	-	Valyl/Leucyl/Isoleucyl-tRNA synthetase, class Ia, editing domain||Valyl/Leucyl/Isoleucyl-tRNA synthetase, class I, anticodon-binding||Integrase, catalytic core||Aminoacyl-tRNA synthetase, class I, conserved site||Aminoacyl-tRNA synthetase, class 1a, anticodon-binding||Rossmann-like alpha/beta/alpha sandwich fold||Ribonuclease H-like domain||Aminoacyl-tRNA synthetase, class Ia||Valine-tRNA ligase
VIT_16s0100g01300	vvi-miR3629a-3p	-	XPG-I domain||XPG/Rad2 endonuclease||5'-3' exonuclease, C-terminal domain||PIN domain-like||Helix-hairpin-helix motif, class 2||XPG N-terminal||Chromo domain-like
VIT_16s0115g00070	vvi-miR159c,vvi-miR319e	-	Methyltransferase-like||Nicotinamide N-methyltransferase-like||Methyltransferase type 12||S-adenosyl-L-methionine-dependent methyltransferase-like
VIT_16s0115g00080	vvi-miR3629a-3p	-	Ribosomal protein L35, conserved site||Ribosomal protein L35||Ribosomal protein L35, non-mitochondrial
VIT_16s0115g00300	novel_141	-	Methyltransferase-like||Nicotinamide N-methyltransferase-like||S-adenosyl-L-methionine-dependent methyltransferase-like||Methyltransferase type 12
VIT_16s0115g00310	vvi-miR3629a-3p	-	Ribosomal protein L35||Ribosomal protein L35, conserved site||Ribosomal protein L35, non-mitochondrial
VIT_16s0148g00230	vvi-miR845c,vvi-miR845d,vvi-miR845a	-	Protein kinase, catalytic domain||Protein kinase-like domain||Protein kinase, ATP binding site
VIT_17s0000g00210	vvi-miR394b	-	C2 calcium-dependent membrane targeting||Copine||Protein BONZAI||von Willebrand factor, type A
VIT_17s0000g00300	vvi-miR3629a-3p	-	Signal recognition particle subunit SRP68
VIT_17s0000g00570	vvi-miR3629a-5p	-	Domain of unknown function DUF4210
VIT_17s0000g00600	vvi-miR845a	-	GNAT domain||Acyl-CoA N-acyltransferase
VIT_17s0000g00860	vvi-miR845d	-	CID domain||RNA polymerase II-binding domain||ENTH/VHS
VIT_17s0000g01160	vvi-miR3629a-5p	-	Major facilitator superfamily domain||Nodulin-like
VIT_17s0000g01240	vvi-miR3631a-3p	-	Bacterial transferase hexapeptide repeat||Trimeric LpxA-like
VIT_17s0000g01260	vvi-miR156e,vvi-miR156f,vvi-miR156b,vvi-miR156a	-	Transcription factor, SBP-box
VIT_17s0000g01560	vvi-miR3629a-5p	-	COG complex component, COG2||Conserved oligomeric Golgi complex, subunit 2, N-terminal||COG complex component, COG2, C-terminal
VIT_17s0000g01620	vvi-miR3629a-3p	-	Phosphoribulokinase/uridine kinase||P-loop containing nucleoside triphosphate hydrolase||Uridine kinase-like protein, plant||Phosphoribosyltransferase-like||Uridine kinase
VIT_17s0000g01730	vvi-miR3629a-3p	-	P-loop containing nucleoside triphosphate hydrolase||Adenylate kinase, subfamily||Adenylate kinase, active site lid domain||Adenylate kinase
VIT_17s0000g01840	vvi-miR3629a-3p,vvi-miR394b	-	Short-chain dehydrogenase/reductase SDR||Glucose/ribitol dehydrogenase||Short-chain dehydrogenase/reductase, conserved site||3-oxoacyl-(acyl-carrier-protein) reductase||Polyketide synthase, ketoreductase domain||NAD(P)-binding domain
VIT_17s0000g01860	vvi-miR3629a-5p	-	GAGA binding-like
VIT_17s0000g02000	vvi-miR3623-3p	-	Protein kinase, catalytic domain||AGC-kinase, C-terminal||Protein kinase-like domain||Pleckstrin homology-like domain||Serine/threonine-protein kinase, active site||Serine/threonine- / dual specificity protein kinase, catalytic domain
VIT_17s0000g02030	vvi-miR156a	-	DnaJ domain, conserved site||DnaJ domain||Heat shock protein DnaJ, cysteine-rich domain||Chaperone DnaJ, C-terminal||HSP40/DnaJ peptide-binding||Chaperone DnaJ
VIT_17s0000g02040	vvi-miR3629a-5p	-	Zinc-finger domain of monoamine-oxidase A repressor R1
VIT_17s0000g02140	vvi-miR396b	-	NAD(P)-binding domain||Ketose-bisphosphate aldolase, class-II||Protein of unknown function, DUF1537||3-hydroxyisobutyrate dehydrogenase-related, conserved site||NADP-dependent 3-hydroxyisobutyrate dehydrogenase, NAD-binding domain||6-phosphogluconate dehydrogenase, NADP-binding||Aldolase-type TIM barrel||6-phosphogluconate dehydrogenase, C-terminal-like||Dehydrogenase, multihelical
VIT_17s0000g02160	vvi-miR3633a-5p	-	Protein of unknown function DUF3007
VIT_17s0000g02190	vvi-miR3631a-3p	-	Surfeit locus 1/Shy1
VIT_17s0000g02300	vvi-miR482	-	Telomere end binding protein||Nucleic acid-binding, OB-fold||Protection of telomeres protein 1
VIT_17s0000g02360	vvi-miR845d,vvi-miR845c	-	Protein kinase, catalytic domain||Concanavalin A-like lectin/glucanase, subgroup||Protein kinase-like domain||Tyrosine-protein kinase, active site||Leucine-rich repeat, typical subtype||Leucine-rich repeat||Leucine-rich repeat-containing N-terminal, type 2||Protein kinase, ATP binding site
VIT_17s0000g02760	vvi-miR408	-	Peroxin-3
VIT_17s0000g02820	vvi-miR408	-	Peroxin-3
VIT_17s0000g03010	vvi-miR3631a-3p,vvi-miR3631a-5p,vvi-miR3631b-3p	-	Phosphatidyl serine synthase
VIT_17s0000g03080	vvi-miR159c	-	NB-ARC||P-loop containing nucleoside triphosphate hydrolase||Leucine-rich repeat||Leucine rich repeat 4
VIT_17s0000g03110	vvi-miR3640-3p	-	Prolyl 4-hydroxylase, alpha subunit||Oxoglutarate/iron-dependent dioxygenase
VIT_17s0000g03500	vvi-miR396b	-	JAB1/Mov34/MPN/PAD-1||USP8 dimerisation domain
VIT_17s0000g04030	vvi-miR319e,vvi-miR159c	-	Endonuclease/exonuclease/phosphatase
VIT_17s0000g04450	vvi-miR319b	-	P-type ATPase, cytoplasmic domain N||HAD-like domain||Phospholipid-transporting P-type ATPase, subfamily IV||Cation-transporting P-type ATPase||P-type ATPase, A domain||P-type ATPase, phosphorylation site
VIT_17s0000g04640	vvi-miR167b	-	50S ribosomal protein L30e-like||H/ACA ribonucleoprotein complex, subunit Nhp2, eukaryote||Ribosomal protein L7Ae/L8/Nhp2 family||Ribosomal protein L7Ae/L30e/S12e/Gadd45
VIT_17s0000g04770	vvi-miR3633a-5p	-	Zinc finger, RING-type, conserved site||Zinc finger, FYVE/PHD-type||Zinc finger, PHD-finger||Zinc finger, PHD-type||Zinc finger, RING/FYVE/PHD-type||Zinc finger, RING-type
VIT_17s0000g04780	vvi-miR3633b-5p	-	Phosphatidylinositol 3-/4-kinase, catalytic domain
VIT_17s0000g04900	vvi-miR156a,vvi-miR156b	-	DNA/RNA helicase, DEAD/DEAH box type, N-terminal||Ubiquitin-related domain||P-loop containing nucleoside triphosphate hydrolase||DEAD/DEAH-box helicase, putative||Ubiquitin||Helicase, superfamily 1/2, ATP-binding domain||Helicase, C-terminal
VIT_17s0000g05010	vvi-miR159c	-	F-box associated interaction domain||F-box associated domain, type 1||F-box domain, cyclin-like
VIT_17s0000g05020	vvi-miR156e,vvi-miR156f,vvi-miR156b,vvi-miR156a	-	Transcription factor, SBP-box
VIT_17s0000g05370	vvi-miR3629a-3p	-	Myc-type, basic helix-loop-helix (bHLH) domain||Basic helix-loop-helix (bHLH) transcription factors BEE-like, plant
VIT_17s0000g05820	vvi-miR3629a-5p	-	Ubiquitin-conjugating enzyme/RWD-like||Ubiquitin-conjugating enzyme, E2||Ubiquitin-conjugating enzyme, active site
VIT_17s0000g05850	vvi-miR3631b-3p,vvi-miR3635-3p,vvi-miR3631a-3p	-	AAA+ ATPase domain||P-loop containing nucleoside triphosphate hydrolase||ABC transporter, conserved site||ABC transporter A, ABCA||ABC transporter-like
VIT_17s0000g05970	vvi-miR3629a-5p	-	Ribosomal protein S4/S9, N-terminal||Ribosomal protein S4/S9||RNA-binding S4 domain||Ribosomal protein S4, conserved site||Ribosomal protein S4/S9, eukaryotic/archaeal
VIT_17s0000g06230	vvi-miR156a,vvi-miR3629a-3p	-	Protein of unknown function DUF3675||Zinc finger, RING/FYVE/PHD-type||Zinc finger, RING-CH-type
VIT_17s0000g06320	vvi-miR3631a-5p	-	HNH nuclease||HNH endonuclease
VIT_17s0000g06400	vvi-miR164a	-	No apical meristem (NAM) protein
VIT_17s0000g06580	vvi-miR3638-5p,vvi-miR3638-3p	-	GOSR2/Membrin/Bos1||t-SNARE||Vesicle transport v-SNARE, N-terminal
VIT_17s0000g06880	vvi-miR3629a-5p	-	Glycoside hydrolase, family 79||Glycoside hydrolase, catalytic domain||Glycoside hydrolase, superfamily
VIT_17s0000g07520	vvi-miR396a,vvi-miR396b	-	Protein kinase, C-terminal||AGC-kinase, C-terminal||Protein kinase, catalytic domain||Serine/threonine-protein kinase, active site||Serine/threonine- / dual specificity protein kinase, catalytic domain||Protein kinase, ATP binding site||Protein kinase-like domain
VIT_17s0000g07530	vvi-miR396a,vvi-miR396b	-	Armadillo-like helical||Armadillo-type fold||Exportin-1/Importin-beta-like
VIT_17s0000g07550	vvi-miR3623-3p	-	Zinc finger, RING-type||Zinc finger, RING/FYVE/PHD-type
VIT_17s0000g07580	vvi-miR3629a-3p	-	CheY-like superfamily||Signal transduction response regulator, receiver domain
VIT_17s0000g07650	vvi-miR3634-5p	-	Aldehyde/histidinol dehydrogenase||Aldehyde dehydrogenase, conserved site||Aldehyde dehydrogenase domain||Aldehyde dehydrogenase, N-terminal||Aldehyde dehydrogenase, glutamic acid active site||Aldehyde dehydrogenase, C-terminal
VIT_17s0000g07680	novel_141	-	Alpha-N-acetylglucosaminidase, N-terminal||Alpha-N-acetylglucosaminidase, tim-barrel domain||Alpha-N-acetylglucosaminidase||Alpha-N-acetylglucosaminidase, C-terminal
VIT_17s0000g07700	vvi-miR3629a-3p	-	S-adenosyl-L-methionine-dependent methyltransferase-like||rRNA small subunit methyltransferase G
VIT_17s0000g07760	vvi-miR3629a-5p	-	Glycoside hydrolase, family 47
VIT_17s0000g08230	vvi-miR403a	-	Uncharacterised protein family UPF0497, trans-membrane plant
VIT_17s0000g08330	vvi-miR396a,vvi-miR396b	-	Armadillo-like helical
VIT_17s0000g08470	vvi-miR3631b-3p	-	Carbonic anhydrase
VIT_17s0000g08480	vvi-miR828a	-	Myb domain||SANT/Myb domain||Homeodomain-like
VIT_17s0000g08730	vvi-miR156e	-	Protein phosphatase 2A, regulatory subunit PR55||WD40-repeat-containing domain||WD40 repeat||WD40/YVTN repeat-like-containing domain
VIT_17s0000g08890	vvi-miR396b	-	AAA+ ATPase domain||Aspartate decarboxylase-like domain||ATPase, AAA-type, core||CDC48, N-terminal subdomain||CDC48, domain 2||ATPase, AAA-type, CDC48||CDC48 domain 2-like||P-loop containing nucleoside triphosphate hydrolase||ATPase, AAA-type, conserved site
VIT_17s0000g09720	vvi-miR3629a-3p	-	CENP-S complex, centromere protein X
VIT_17s0000g09740	vvi-miR156f	-	Alpha/beta hydrolase fold-5||Alpha/Beta hydrolase fold
VIT_17s0000g09870	vvi-miR166a	-	Armadillo-type fold||MIF4-like, type 1/2/3||Initiation factor eIF-4 gamma, MA3
VIT_17s0000g10100	vvi-miR3629a-5p	-	Homeodomain-like||Signal transduction response regulator, receiver domain||CheY-like superfamily||Myb domain, plants||SANT/Myb domain
VIT_17s0000g10110	vvi-miR3629a-5p,vvi-miR845a,vvi-miR845d	-	Signal transduction response regulator, receiver domain||CheY-like superfamily||SANT/Myb domain||Myb domain, plants||Homeodomain-like
VIT_17s0000g10240	vvi-miR3629a-5p	-	Peptidase C48, SUMO/Sentrin/Ubl1
VIT_17s0000g10300	vvi-miR477a,vvi-miR477b-5p	-	Transcription factor GRAS||Scarecrow-like protein 28
VIT_17s0053g00680	vvi-miR168	-	Domain of unknown function DUF1785||Ribonuclease H-like domain||Argonaute/Dicer protein, PAZ||Argonaut, glycine-rich domain||Stem cell self-renewal protein Piwi
VIT_17s0053g00760	vvi-miR396a,vvi-miR396b	-	RNA recognition motif domain||Nucleotide-binding, alpha-beta plait
VIT_17s0119g00030	vvi-miR390	-	Guanine nucleotide binding protein (G-protein), alpha subunit||P-loop containing nucleoside triphosphate hydrolase||G protein alpha subunit, helical insertion
VIT_17s0119g00350	vvi-miR319e,vvi-miR3629a-3p,vvi-miR159c	-	Dak kinase||Dak phosphatase||Dihydroxyacetone kinase
VIT_18s0001g00090	novel_141	-	Protein of unknown function DUF760
VIT_18s0001g00380	vvi-miR3625-5p	-	Alcohol dehydrogenase GroES-like||Alcohol dehydrogenase superfamily, zinc-type||GroES-like||NAD(P)-binding domain||Alcohol dehydrogenase, C-terminal||Alcohol dehydrogenase, zinc-type, conserved site
VIT_18s0001g00640	vvi-miR396a,vvi-miR396b	-	Tetratricopeptide-like helical||Pentatricopeptide repeat
VIT_18s0001g01350	vvi-miR156b,vvi-miR156e,vvi-miR156a	-	P-loop containing nucleoside triphosphate hydrolase||DNA helicase, DnaB-like, C-terminal||Twinkle protein
VIT_18s0001g01580	novel_141	-	Zinc finger, RING-type||Zinc finger, RING/FYVE/PHD-type||Zinc finger, PHD-type||Zinc finger, PHD-finger||Zinc finger, FYVE/PHD-type
VIT_18s0001g01600	vvi-miR477b-3p	-	Putative S-adenosyl-L-methionine-dependent methyltransferase||S-adenosyl-L-methionine-dependent methyltransferase-like
VIT_18s0001g01820	novel_141	-	No apical meristem (NAM) protein
VIT_18s0001g01990	vvi-miR3629a-5p	-	Pseudouridine synthase, catalytic domain||Pseudouridine synthase I, TruA, C-terminal||Pseudouridine synthase I, TruA, N-terminal||Pseudouridine synthase I, TruA||Pseudouridine synthase I, TruA, alpha/beta domain
VIT_18s0001g02120	vvi-miR3631a-5p,vvi-miR3631a-3p,vvi-miR3631b-3p	-	Natural resistance-associated macrophage protein
VIT_18s0001g02380	novel_141	-	Kinesin-like protein||P-loop containing nucleoside triphosphate hydrolase||Kinesin, motor domain||Kinesin, motor region, conserved site
VIT_18s0001g02390	vvi-miR845d,vvi-miR845c	-	Multicopper oxidase, type 2||Multicopper oxidase, copper-binding site||Multicopper oxidase, type 1||Cupredoxin
VIT_18s0001g02710	vvi-miR477b-5p	-	TRAM/LAG1/CLN8 homology domain
VIT_18s0001g02760	vvi-miR156e,vvi-miR159a	-	SGNH hydrolase-type esterase domain||Lipase, GDSL
VIT_18s0001g02770	vvi-miR156e,vvi-miR159a	-	Lipase, GDSL||SGNH hydrolase-type esterase domain
VIT_18s0001g02820	vvi-miR3629a-5p	-	WD40 repeat, conserved site||WD40/YVTN repeat-like-containing domain||WD40-repeat-containing domain||WD40 repeat
VIT_18s0001g03070	vvi-miR2111-5p,vvi-miR3629a-5p	-	SPla/RYanodine receptor SPRY||CTLH, C-terminal LisH motif||B30.2/SPRY domain||Concanavalin A-like lectin/glucanase, subgroup||CTLH/CRA C-terminal to LisH motif domain||Protein Ssh4 like||CRA domain
VIT_18s0001g03310	vvi-miR171f	-	Scarecrow-like protein 26/nodulation signalling pathway 2||Transcription factor GRAS
VIT_18s0001g03490	vvi-miR3623-5p	-	Oxoglutarate/iron-dependent dioxygenase||Isopenicillin N synthase-like||Non-haem dioxygenase N-terminal domain
VIT_18s0001g03660	vvi-miR3629a-3p,vvi-miR3629a-5p	-	Homoserine dehydrogenase, catalytic||Aspartate/glutamate/uridylate kinase||Aspartate kinase domain||Bifunctional aspartokinase/homoserine dehydrogenase I||Homoserine dehydrogenase, conserved site||Aspartate kinase, conserved site||NAD(P)-binding domain||Aspartate/homoserine dehydrogenase, NAD-binding||ACT domain
VIT_18s0001g03690	vvi-miR3639-3p	-	RuvA domain 2-like
VIT_18s0001g03710	vvi-miR477b-3p	-	Leucine-rich repeat||Leucine rich repeat 4||Leucine-rich repeat, typical subtype||Toll/interleukin-1 receptor homology (TIR) domain||P-loop containing nucleoside triphosphate hydrolase||NB-ARC
VIT_18s0001g03760	vvi-miR3629a-5p	-	Biotin protein ligase, C-terminal||Biotin/lipoate A/B protein ligase||Biotin--acetyl-CoA-carboxylase ligase
VIT_18s0001g03790	vvi-miR403a	-	Pleckstrin homology-like domain||Oxysterol-binding protein||Pleckstrin homology domain
VIT_18s0001g03950	vvi-miR156a	-	Protein of unknown function DUF1644||Zinc finger, RING/FYVE/PHD-type
VIT_18s0001g04680	vvi-miR159a	-	EEIG1/EHBP1 N-terminal domain
VIT_18s0001g04690	vvi-miR845a	-	Terpenoid synthase||Terpene synthase, metal-binding domain
VIT_18s0001g05270	vvi-miR169f,vvi-miR169x	-	Endoplasmic reticulum vesicle transporter, C-terminal
VIT_18s0001g05590	vvi-miR156b	-	Endonuclease/exonuclease/phosphatase
VIT_18s0001g05700	vvi-miR845c,vvi-miR845d	-	Glucosylceramidase||Beta-glucosidase, GBA2 type||Six-hairpin glycosidase-like||Beta-glucosidase, GBA2 type, N-terminal
VIT_18s0001g05870	vvi-miR159c,vvi-miR477b-3p	-	Tetratricopeptide-like helical
VIT_18s0001g05990	vvi-miR845c,vvi-miR845a,vvi-miR845d	-	UDP-glucuronosyl/UDP-glucosyltransferase
VIT_18s0001g06020	novel_141	-	Phosphate-induced protein 1
VIT_18s0001g06170	novel_141	-	Phosphate-induced protein 1
VIT_18s0001g06330	vvi-miR3629a-3p	-	14-3-3 protein||14-3-3 domain||14-3-3 protein, conserved site
VIT_18s0001g06340	vvi-miR3623-5p	-	Toll/interleukin-1 receptor homology (TIR) domain||P-loop containing nucleoside triphosphate hydrolase||NB-ARC
VIT_18s0001g06460	vvi-miR156e	-	Queuine tRNA-ribosyltransferase||Queuine/other tRNA-ribosyltransferase
VIT_18s0001g06500	vvi-miR159c	-	FAM91, C-terminal domain||FAM91, N-terminal domain
VIT_18s0001g06780	vvi-miR3626-3p	-	Protein kinase-like domain||Protein kinase, ATP binding site||Serine/threonine- / dual specificity protein kinase, catalytic domain||Serine/threonine-protein kinase, active site||Protein kinase, catalytic domain
VIT_18s0001g06900	vvi-miR845a	-	Thioredoxin-like fold||Glutathione S-transferase, N-terminal
VIT_18s0001g07090	vvi-miR169d	-	Serine hydrolase FSH||Alpha/Beta hydrolase fold
VIT_18s0001g07550	vvi-miR169d	-	P-loop containing nucleoside triphosphate hydrolase||Kinesin-like protein||Kinesin, motor domain||Kinesin, motor region, conserved site
VIT_18s0001g07660	vvi-miR3633a-5p	-	M-phase-specific PLK1-interacting protein-like
VIT_18s0001g07710	vvi-miR2950-5p,vvi-miR396a,vvi-miR159c,vvi-miR845c,vvi-miR396b	-	WD40/YVTN repeat-like-containing domain||BEACH domain||WD40 repeat||Armadillo-like helical||WD40-repeat-containing domain||Concanavalin A-like lectin/glucanase, subgroup||PH-BEACH domain||Armadillo-type fold
VIT_18s0001g07740	vvi-miR319e,vvi-miR159c	-	FMP27, C-terminal
VIT_18s0001g07770	vvi-miR3629a-5p	-	CHCH||Cysteine alpha-hairpin motif superfamily
VIT_18s0001g07780	vvi-miR3639-3p,vvi-miR3629a-3p	-	Ribonuclease H-like domain||Ribonuclease H domain||TB2/DP1/HVA22-related protein
VIT_18s0001g07810	vvi-miR156b	-	UBA-like||Ubiquitin interacting motif||Ubiquitin-associated/translation elongation factor EF1B, N-terminal||HECT||Domain of unknown function DUF4414||Ubiquitin-associated/translation elongation factor EF1B, N-terminal, eukaryote||Armadillo-type fold||E3 ubiquitin ligase, domain of unknown function DUF913||E3 ubiquitin ligase, domain of unknown function DUF908
VIT_18s0001g08120	vvi-miR394b	-	Ubiquitin-fold modifier-conjugating enzyme 1||Ubiquitin-conjugating enzyme/RWD-like
VIT_18s0001g10260	vvi-miR3629a-3p	-	Zinc finger, RING/FYVE/PHD-type||Zinc finger, RING-type
VIT_18s0001g10880	novel_141	-	Acyl transferase/acyl hydrolase/lysophospholipase||Patatin/Phospholipase A2-related
VIT_18s0001g10920	novel_141	-	Acyl transferase/acyl hydrolase/lysophospholipase||Patatin/Phospholipase A2-related
VIT_18s0001g10950	novel_141	-	Patatin/Phospholipase A2-related||Acyl transferase/acyl hydrolase/lysophospholipase
VIT_18s0001g10980	vvi-miR845a,novel_141	-	Acyl transferase/acyl hydrolase/lysophospholipase||Patatin/Phospholipase A2-related
VIT_18s0001g11010	novel_141	-	Acyl transferase/acyl hydrolase/lysophospholipase||Patatin/Phospholipase A2-related
VIT_18s0001g11270	vvi-miR3633a-5p	-	Serpin domain||Serpin family||Protease inhibitor I4, serpin, conserved site
VIT_18s0001g11570	vvi-miR845c,vvi-miR845a	-	Cytochrome P450, E-class, group I||Cytochrome P450, conserved site||Cytochrome P450
VIT_18s0001g11700	vvi-miR3631a-3p,vvi-miR3631b-3p	-	Exocyst complex, component Exoc1||Exocyst complex component Sec3, PIP2-binding N-terminal domain
VIT_18s0001g11820	vvi-miR845a	-	Ubiquitin interacting motif||Protein of unknown function DUF3633||Zinc finger, LIM-type
VIT_18s0001g12210	vvi-miR845a	-	Cytochrome P450, E-class, group I||Cytochrome P450, conserved site||Cytochrome P450
VIT_18s0001g12880	vvi-miR3631b-3p,vvi-miR3631a-5p,vvi-miR3631a-3p	-	S-adenosyl-L-methionine-dependent methyltransferase-like||SAM dependent carboxyl methyltransferase
VIT_18s0001g13000	vvi-miR159c	-	AP complex, mu/sigma subunit||Clathrin adaptor, mu subunit||Mu homology domain||Longin-like domain||Clathrin adaptor, mu subunit, C-terminal
VIT_18s0001g13160	vvi-miR156f	-	rRNA small subunit methyltransferase I||Tetrapyrrole methylase, subdomain 1||SAM-dependent methyltransferase RsmI, conserved site||Tetrapyrrole methylase, subdomain 2||Tetrapyrrole methylase
VIT_18s0001g13410	vvi-miR394b	-	ATPase, V0 complex, subunit 116kDa||ATPase, V0 complex, subunit 116kDa, eukaryotic
VIT_18s0001g13530	vvi-miR3629a-5p	-	Arfaptin homology (AH) domain/BAR domain||Src homology-3 domain
VIT_18s0001g13900	vvi-miR394b	-	TLDc
VIT_18s0001g14020	vvi-miR3638-5p	-	Putative 5-3 exonuclease||5'-3' exoribonuclease||Zinc finger, CCHC-type||5'-3' exoribonuclease 2
VIT_18s0001g14070	vvi-miR3629a-5p	-	Myb/SANT-like domain
VIT_18s0001g14100	vvi-miR3629a-3p	-	TB2/DP1/HVA22-related protein
VIT_18s0001g14410	vvi-miR845d	-	Protein of unknown function DUF3475||Protein of unknown function DUF668
VIT_18s0001g14750	vvi-miR845d,vvi-miR845c	-	Zinc finger, FYVE-related||Zinc finger, FYVE-type||Zinc finger, RING/FYVE/PHD-type||Zinc finger, FYVE/PHD-type
VIT_18s0001g14990	vvi-miR159c,vvi-miR319e	-	Concanavalin A-like lectin/glucanase, subgroup||Protein kinase, catalytic domain||Reverse transcriptase, RNA-dependent DNA polymerase||Tyrosine-protein kinase, active site||Protein kinase, ATP binding site||Protein kinase-like domain
VIT_18s0001g15050	vvi-miR3631a-5p	-	Protein phosphatase 2C (PP2C)-like||Protein phosphatase 2C, manganese/magnesium aspartate binding site||Protein phosphatase 2C
VIT_18s0001g15240	vvi-miR408	-	Cupredoxin||Plastocyanin-like
VIT_18s0001g15570	vvi-miR3638-5p	-	Zinc finger, CCCH-type
VIT_18s0041g00100	vvi-miR394b,vvi-miR159c,vvi-miR319e	-	S-adenosyl-L-methionine-dependent methyltransferase-like||N2227-like
VIT_18s0041g00350	vvi-miR3629a-5p,vvi-miR156a	-	Dienelactone hydrolase||Alpha/Beta hydrolase fold
VIT_18s0041g00360	vvi-miR3629a-3p	-	Protein of unknown function DUF543
VIT_18s0041g01430	vvi-miR477b-3p,vvi-miR3631b-3p	-	Leucine-rich repeat, typical subtype||Leucine-rich repeat
VIT_18s0041g01620	vvi-miR3623-5p	-	Leucine-rich repeat 3||NB-ARC||Leucine-rich repeat, cysteine-containing subtype||Leucine rich repeat 4||Leucine-rich repeat||Leucine-rich repeat, typical subtype||P-loop containing nucleoside triphosphate hydrolase||Toll/interleukin-1 receptor homology (TIR) domain
VIT_18s0041g01650	vvi-miR3623-5p	-	Toll/interleukin-1 receptor homology (TIR) domain
VIT_18s0041g01870	vvi-miR845a	-	Rossmann-like alpha/beta/alpha sandwich fold||Cytidyltransferase-like domain||DNA-directed RNA polymerase, RBP11-like
VIT_18s0041g02180	vvi-miR482,vvi-miR3623-5p	-	NB-ARC||P-loop containing nucleoside triphosphate hydrolase||Zinc finger, LIM-type||Protein of unknown function DUF3633
VIT_18s0041g02190	vvi-miR482	-	NB-ARC||Zinc finger, LIM-type||P-loop containing nucleoside triphosphate hydrolase
VIT_18s0041g02230	vvi-miR3635-3p	-	P-loop containing nucleoside triphosphate hydrolase
VIT_18s0041g02300	vvi-miR3629a-5p	-	P-loop containing nucleoside triphosphate hydrolase
VIT_18s0072g00020	vvi-miR3629a-5p	-	Nucleic acid-binding, OB-fold
VIT_18s0072g00140	vvi-miR3629a-3p	-	Serine/threonine-protein kinase, active site||Serine/threonine- / dual specificity protein kinase, catalytic domain||Protein kinase, ATP binding site||Protein kinase-like domain||Protein kinase, catalytic domain
VIT_18s0072g00550	vvi-miR156e	-	WD40-repeat-containing domain||Protein BYPASS-related||WD40/YVTN repeat-like-containing domain
VIT_18s0072g00780	vvi-miR167c	-	Domain of unknown function DUF4205||EF-hand-like domain||Ubiquitin interacting motif
VIT_18s0072g00820	vvi-miR2950-5p	-	F-box domain, cyclin-like||Leucine-rich repeat, cysteine-containing subtype
VIT_18s0072g00860	vvi-miR3629a-5p	-	Tetratricopeptide repeat||Tetratricopeptide-like helical||Tetratricopeptide repeat-containing domain
VIT_18s0072g00950	vvi-miR162	-	Magnesium transporter NIPA
VIT_18s0075g00480	vvi-miR166a	-	Leucine-rich repeat, typical subtype||P-loop containing nucleoside triphosphate hydrolase||Leucine-rich repeat||NB-ARC
VIT_18s0075g00700	vvi-miR159c	-	Multicopper oxidase, type 2||Multicopper oxidase, type 1||Cupredoxin
VIT_18s0076g00210	vvi-miR3626-3p	-	Alpha/Beta hydrolase fold||Alpha/beta hydrolase fold-1
VIT_18s0076g00260	vvi-miR156b,vvi-miR156e	-	Protein of unknown function DUF668||Protein of unknown function DUF3475
VIT_18s0086g00190	vvi-miR396b	-	Magnesium transporter NIPA
VIT_18s0089g00030	vvi-miR3631b-3p	-	Armadillo-type fold||Armadillo-like helical||Protein kinase, catalytic domain||Protein kinase-like domain||Serine/threonine- / dual specificity protein kinase, catalytic domain
VIT_18s0089g00100	vvi-miR396b,vvi-miR396a	-	Leucine-rich repeat||P-loop containing nucleoside triphosphate hydrolase||Toll/interleukin-1 receptor homology (TIR) domain||Leucine-rich repeat, typical subtype||NB-ARC
VIT_18s0089g00360	vvi-miR3629a-5p	-	PUA-like domain||Translation initiation factor SUI1||Pseudouridine synthase/archaeosine transglycosylase||SWIB/MDM2 domain
VIT_18s0089g00660	vvi-miR172c,vvi-miR172a	-	Leucine-rich repeat||Leucine-rich repeat, typical subtype
VIT_18s0089g00730	vvi-miR394b	-	SET domain
VIT_18s0089g00820	vvi-miR3629a-5p	-	Nucleic acid-binding, OB-fold
VIT_18s0089g01240	vvi-miR3627-3p	-	ATPase, AAA-type, core||P-loop containing nucleoside triphosphate hydrolase||Clp protease, ATP-binding subunit ClpX||Clp ATPase, C-terminal||AAA+ ATPase domain
VIT_18s0117g00150	vvi-miR3631a-3p	-	RNA recognition motif domain||Nucleotide-binding, alpha-beta plait
VIT_18s0122g00260	vvi-miR477b-3p	-	Tetratricopeptide-like helical||Tetratricopeptide repeat||Tetratricopeptide TPR-1||Tetratricopeptide repeat-containing domain
VIT_18s0122g00420	vvi-miR397a	-	Multicopper oxidase, type 3||Multicopper oxidase, type 1||Cupredoxin||Laccase||Multicopper oxidase, copper-binding site||Multicopper oxidase, type 2
VIT_18s0122g01280	vvi-miR396b	-	Niemann-Pick C type protein||Patched||Sterol-sensing domain
VIT_18s0122g01290	vvi-miR172b,vvi-miR172a	-	Plant regulator RWP-RK||Phox/Bem1p
VIT_18s0157g00190	vvi-miR3629a-3p	-	Protein kinase-like domain||Choline/Ethanolamine kinase
VIT_18s0166g00290	vvi-miR845c,vvi-miR845d	-	ACT domain||Serine/threonine-protein kinase, active site||Serine/threonine- / dual specificity protein kinase, catalytic domain||Protein kinase-like domain||Serine-threonine/tyrosine-protein kinase catalytic domain||Protein kinase, catalytic domain
VIT_19s0014g00220	vvi-miR3626-3p	-	Serine/threonine- / dual specificity protein kinase, catalytic domain||Mitogen-activated protein (MAP) kinase, conserved site||Protein kinase-like domain||Protein kinase, ATP binding site||Protein kinase, catalytic domain
VIT_19s0014g00620	vvi-miR159c,vvi-miR390,vvi-miR319e	-	Malectin
VIT_19s0014g00870	vvi-miR3631a-3p	-	NB-ARC||P-loop containing nucleoside triphosphate hydrolase||Leucine-rich repeat, typical subtype||BZR1, transcriptional repressor
VIT_19s0014g01210	vvi-miR166a	-	DOG1 domain
VIT_19s0014g01260	vvi-miR3629a-5p	-	Lambda repressor-like, DNA-binding domain||Helix-turn-helix type 3||Multiprotein bridging factor 1, N-terminal
VIT_19s0014g01460	vvi-miR3629a-3p	-	Ubiquitin-conjugating enzyme/RWD-like||Ubiquitin-conjugating enzyme, E2||Ubiquitin-conjugating enzyme, active site
VIT_19s0014g01700	vvi-miR159c	-	Plant transcription factor NOZZLE
VIT_19s0014g01710	vvi-miR3629a-3p	-	EF-hand-like domain||Sodium/calcium exchanger membrane region||Calcium-binding EF-hand||EF-Hand 1, calcium-binding site
VIT_19s0014g01790	vvi-miR394b	-	Apoptosis inhibitory 5||Armadillo-like helical||Armadillo-type fold
VIT_19s0014g01860	vvi-miR2950-5p	-	Exonuclease||Ribonuclease H-like domain||Exonuclease, RNase T/DNA polymerase III
VIT_19s0014g01890	vvi-miR3629a-3p,vvi-miR3629a-5p	-	NAD(P)-binding domain||GroES-like||Alcohol dehydrogenase superfamily, zinc-type||Alcohol dehydrogenase GroES-like||Polyketide synthase, enoylreductase
VIT_19s0014g02200	vvi-miR164a	-	No apical meristem (NAM) protein
VIT_19s0014g02310	novel_141	-	Serine/threonine- / dual specificity protein kinase, catalytic domain||Protein kinase-like domain||Protein kinase, ATP binding site||Protein kinase, catalytic domain
VIT_19s0014g02350	vvi-miR156a,vvi-miR156b,vvi-miR156e	-	Transcription factor, SBP-box
VIT_19s0014g02810	vvi-miR156a,vvi-miR394b	-	PAP/25A-associated||Nucleotidyl transferase domain
VIT_19s0014g02970	vvi-miR3629a-5p	-	Choline transporter-like
VIT_19s0014g03000	vvi-miR3629a-3p	-	Leucine-rich repeat||Leucine rich repeat 4||Leucine-rich repeat, typical subtype
VIT_19s0014g03110	vvi-miR319e	-	Riboflavin synthase-like beta-barrel||FAD-binding, type 1||NADPH-cytochrome p450 reductase, FAD-binding, alpha-helical domain-3
VIT_19s0014g03160	vvi-miR408	-	Light-dependent protochlorophyllide reductase||NAD(P)-binding domain||Short-chain dehydrogenase/reductase SDR||Glucose/ribitol dehydrogenase
VIT_19s0014g03190	vvi-miR3629a-3p	-	Protein of unknown function DUF1218
VIT_19s0014g03360	vvi-miR482	-	Foie gras liver health family 1||TRAPP II complex, TRAPPC10
VIT_19s0014g03440	vvi-miR3629a-5p	-	Pyridoxal phosphate-dependent transferase||Aluminium resistance||Pyridoxal phosphate-dependent transferase, major region, subdomain 1||Cys/Met metabolism, pyridoxal phosphate-dependent enzyme
VIT_19s0014g03790	vvi-miR159c	-	Diacylglycerol kinase, accessory domain||Diacylglycerol kinase, catalytic domain||ATP-NAD kinase-like domain
VIT_19s0014g03940	vvi-miR3629a-5p,vvi-miR3629a-3p	-	Plant transcription factor NOZZLE
VIT_19s0014g04140	vvi-miR845a,vvi-miR845d,vvi-miR845c	-	S-locus glycoprotein, mannose-binding-type||Bulb-type lectin domain
VIT_19s0014g05110	vvi-miR2950-5p	-	Domain of unknown function DUF1995
VIT_19s0014g05150	vvi-miR482	-	NB-ARC||AAA+ ATPase domain||Leucine-rich repeat||P-loop containing nucleoside triphosphate hydrolase
VIT_19s0014g05230	vvi-miR845c,vvi-miR845d	-	Pentatricopeptide repeat
VIT_19s0015g00010	vvi-miR3635-5p	-	P-loop containing nucleoside triphosphate hydrolase||ABC transporter, conserved site||ABC transporter, transmembrane domain, type 1||ABC transporter-like||AAA+ ATPase domain
VIT_19s0015g00020	vvi-miR3635-5p	-	ABC transporter, conserved site||ABC transporter, transmembrane domain, type 1||ABC transporter-like||P-loop containing nucleoside triphosphate hydrolase||AAA+ ATPase domain
VIT_19s0015g00050	vvi-miR3635-5p	-	AAA+ ATPase domain||P-loop containing nucleoside triphosphate hydrolase||ABC transporter-like||ABC transporter, transmembrane domain, type 1||ABC transporter, conserved site
VIT_19s0015g00060	vvi-miR3635-5p	-	ABC transporter-like||ABC transporter, conserved site||ABC transporter, transmembrane domain, type 1||P-loop containing nucleoside triphosphate hydrolase||AAA+ ATPase domain
VIT_19s0015g00580	vvi-miR3629a-3p	-	Transcription factor, NFYB/HAP3, conserved site||Histone-fold||Transcription factor CBF/NF-Y/archaeal histone
VIT_19s0015g00630	vvi-miR3629a-3p,vvi-miR156e,vvi-miR156f,vvi-miR156b,vvi-miR156a	-	Cupredoxin||Plastocyanin-like
VIT_19s0015g00670	novel_141	-	Armadillo-type fold||E3 ubiquitin ligase, domain of unknown function DUF913||Ubiquitin-associated/translation elongation factor EF1B, N-terminal, eukaryote||E3 ubiquitin ligase, domain of unknown function DUF908||Ubiquitin-associated/translation elongation factor EF1B, N-terminal||Ubiquitin interacting motif||Armadillo-like helical||UBA-like
VIT_19s0015g00680	vvi-miR394b	-	HECT||Domain of unknown function DUF4414
VIT_19s0015g02040	vvi-miR319e,vvi-miR319b	-	Putative polysaccharide biosynthesis protein||Nucleotide-sugar transporter
VIT_19s0027g00230	vvi-miR3631b-3p,vvi-miR164a	-	No apical meristem (NAM) protein
VIT_19s0027g00310	vvi-miR394b	-	Ribonuclease Zc3h12a-like
VIT_19s0027g00790	vvi-miR159c,vvi-miR319e	-	Lysozyme-like domain||Lytic transglycosylase-like, catalytic
VIT_19s0027g00910	novel_141	-	No apical meristem (NAM) protein
VIT_19s0027g01170	vvi-miR482	-	Leucine-rich repeat||P-loop containing nucleoside triphosphate hydrolase||NB-ARC
VIT_19s0027g01400	vvi-miR3632-3p	-	P-loop containing nucleoside triphosphate hydrolase||NB-ARC
VIT_19s0027g01790	vvi-miR3629a-3p	-	Pyridoxal phosphate-dependent transferase, major region, subdomain 2||Transaminase, Acetylornithine/Succinylornithine family||Pyridoxal phosphate-dependent transferase||Pyridoxal phosphate-dependent transferase, major region, subdomain 1||Aminotransferase class-III
VIT_19s0085g00600	vvi-miR3629a-3p	-	Glyceraldehyde 3-phosphate dehydrogenase, catalytic domain||Glyceraldehyde/Erythrose phosphate dehydrogenase family||Glyceraldehyde-3-phosphate dehydrogenase, type I||Glyceraldehyde 3-phosphate dehydrogenase, active site||Glyceraldehyde 3-phosphate dehydrogenase, NAD(P) binding domain||NAD(P)-binding domain
VIT_19s0085g00630	vvi-miR3629a-5p	-	Defective-in-cullin neddylation protein||Potentiating neddylation domain||UBA-like
VIT_19s0085g00870	vvi-miR3631b-3p	-	Aldehyde/histidinol dehydrogenase||Aldehyde dehydrogenase domain||Aldehyde dehydrogenase, C-terminal||Aldehyde dehydrogenase, N-terminal
VIT_19s0085g01060	vvi-miR3629a-3p	-	Tetratricopeptide-like helical||Tetratricopeptide repeat||Tetratricopeptide repeat-containing domain
VIT_19s0085g01120	vvi-miR845a	-	Mediator complex, subunit Med22
VIT_19s0090g00220	vvi-miR3629a-3p	-	RNA-binding, CRM domain
VIT_19s0090g00440	vvi-miR3629a-5p	-	HAUS augmin-like complex subunit 4
VIT_19s0090g00590	vvi-miR159c,vvi-miR3629a-5p	-	SANT/Myb domain||Myb domain||Homeodomain-like
VIT_19s0090g00630	novel_141,vvi-miR3629a-5p	-	Tetraacyldisaccharide 4'-kinase
VIT_19s0090g00690	vvi-miR3629a-3p	-	Rab3 GTPase-activating protein catalytic subunit
VIT_19s0090g00990	vvi-miR3629a-5p	-	Acid phosphatase/vanadium-dependent haloperoxidase-related
VIT_19s0090g01180	vvi-miR156a,vvi-miR156b,vvi-miR156e	-	Uncharacterised protein family UPF0041
VIT_19s0090g01230	vvi-miR3629a-5p	-	Microtubule-associated protein, MAP65/Ase1/PRC1
VIT_19s0090g01870	vvi-miR3635-5p	-	P-loop containing nucleoside triphosphate hydrolase||ABC transporter, transmembrane domain, type 1||ABC transporter, conserved site||ABC transporter-like||AAA+ ATPase domain
VIT_19s0093g00380	vvi-miR482	-	P-loop containing nucleoside triphosphate hydrolase||NB-ARC
VIT_19s0093g00480	vvi-miR3629a-3p	-	Peptidyl-prolyl cis-trans isomerase, FKBP-type||Peptidyl-prolyl cis-trans isomerase, FKBP-type, domain
VIT_19s0135g00250	vvi-miR397a	-	Ankyrin repeat||Ankyrin repeat-containing domain
VIT_19s0177g00280	vvi-miR399d	-	DnaJ domain||4Fe-4S ferredoxin-type, iron-sulpur binding domain
